# Supplementary material
Source: Research Square preprint supplement (doi:10.21203/rs.3.rs-9605703/v1)
Supplement: Supplementary file 1 [file 0b608cbac0a292b03e07c3ac.docx]

**Appendix B: Description of Landslide Geologic Units**

| **Grand Mesa Landslide Geologic Unit (Lithology)** | **Symbol** | **Description** | **Primary Source of Unit Description** |
| --- | --- | --- | --- |
| ***Basalt*** | Nb | **Miocene**—Dark-gray, gray-black to reddish-gray basalt that forms the Grand Mesa Volcanic Field (GMVF) capping the Grand Mesa. U.S. Bureau of Reclamation (USBR) well logs on the Palisade Lobe intersected up to 17 individual lava flows (Weston 1987; Cole et al. 2010; Cole et al. 2016). Individual flows are typically highly jointed and texturally zoned from dense to highly vesicular. Long diameters of stretched vesicles approximate flow directions, which generally trend westward. Multiple flows are commonly separated by red paleosols that may be baked by contact metamorphism. Above the mesa rim, the pockmarked, stained, and edge-worn surfaces of the GMVF basalt have been exposed to long-term weathering and periglacial processes since the Miocene. In many areas, subsequent erosion of the soil profile has left reddish-brown-stained basaltic cobble- and boulder-sized rocks exposed at the surface. Reported age dates ranging from 10.49 ± 0.06 to 9.63 ± 0.16 Ma were collected by Inductively Coupled Plasma Mass Spectrometry analyses and Energy-Dispersive X-ray Fluorescence analyses (Cole et al. 2017; Cole et al. 2010; Kunk et al. 2002). The Thickness of the GMVF basalt pile thins to the west, with unit thicknesses ranging from 61 to 122 m, as reported in USBR logs, with 10 sediment interbeds between lava flows (Weston 1987). A gentle westward-dipping gradient of 6.2 m/km is observed at the unconformable contact between the basalts of the GMVF and the underlying Neogene/Paleogene sedimentary bedrock. Present on the mesa top in the Palisade North, Palisade South, Flowing Park Northwest, and Flowing Park Southeast sectors (Ellis and Gabaldo 1989). Two small exposures in the Leon Peak area (Ellis and Freeman 1984). | Chesnutt et al., 2019; White and Palkovic,  2018 |
| ***Goodenough Formation*** | Ng | **Miocene?** —Variegated maroon and greenish-gray, weakly consolidated claystone and siltstone interbedded with tan, brown, and light greenish-gray fine-grained to pebble conglomerate sandstone and minor grayish-white cherty limestone. Pebble clasts are predominantly andesite. The unit may contain streaks of orange-tan staining (Cole et al. 2013) and is in unconformable contact with basalts of the overlying GMVF. Ground movements have disturbed the unit along the rim. | Chesnutt et al., 2019; White and Palkovic,  2018 |
| ***Uinta Formation*** | PƐu | **Eocene**—Light-brown to gray sandstone, gray marlstone, and gray siltstone, which interfingers with the upper part of the Green River Formation (Baum and Odom 1996). Most exposures are in the Leon Peak area. | Chesnutt et al., 2019; White and Palkovic,  2018 |
| ***Green River Formation*** | PƐg | **Eocene**—Gray-white to gray, yellow-tan to light-brown, and light green-gray mudstone, very fine- to fine-grained sandstone, limestone, marlstone, and minor oil shale. This unit creates steeper slopes above the underlying, conformable Wasatch formation contact and an unconformable contact with the overlying Goodenough formation. This unit is prone to slope failure. Disaggregation and flow of rock-mass debris can cause rapid landslides; rock-avalanche/earthflow pathways have moved over 1.6 km down the Grand Mesa slopes. | Chesnutt et al., 2019; White and Palkovic,  2018 |
| ***Wasatch Formation*** | PƐw | **Eocene and Paleocene**—Light-gray to lavender mudstone, reddish-gray sandstone, and siltstone. The unit consists of soft, weakly consolidated mudstones and friable sandstones, which are easily eroded and covered by rocky surficial deposits. Slopes in the Wasatch Formation are prone to instability and landsliding. The formation includes three members in the GMSA: the upper Shire Member is composed of prominently banded, variegated light-gray, gray, lavender, maroon, mudstone, and channel sandstones that may have conglomeritic lenses. The middle Molina Member is a light brown to olive-tan, medium- to coarse-grained friable sandstone, with infrequent gray, green, and maroon beds and lavender mudstone. The basal Atwell Gulch Member is banded light gray, olive-gray, maroon mudstone, and siltstone with a thin (46 m), tan- to brown sandstone. | Chesnutt et al., 2019; White and Palkovic,  2018 |
| ***Mesaverde Group*** | Kmv | **Paleocene (?) to Upper Cretaceous—**There are two exposures of the Mesa Verde group in the GMSA: The Ohio Creek Formation is a gray-white,  light-gray, to light-brown sandstone, conglomerate, and minor thin  beds of mudstone. Massive bedded, medium- to coarse-grained sandstone  beds contain channel-form cross-stratified lenses ranging in grain sizes from  very coarse-grained sandstone, granule conglomerate, to very coarse-pebble  conglomerate with scattered small cobbles <8 cm. Polylithic, rounded  to subrounded pebbles consist of chert, quartzite, sandstone, minor igneous  and metamorphic rocks, and clay rip-up clasts. Dark-gray to lavender  mudstone beds are thin, ranging from lamination partings to 1 m thick. Sandstone at the lower contact with mudstone beds contains vertical root casts. The Williams Fork Formation is a buff to tan, massive, cross-stratified, non-calcareous sandstone, interbedded with gray siltstone, dark-gray shale, carbonaceous shale, and basal coal. This unit was deposited in a terrestrial floodplain environment. The top half of the unit is predominantly massive bedded, laterally extensive, cross-stratified sandstone interbedded with thin- to medium-bedded siltstone and shale. In rare occurrences, narrow shale beds are maroon-red. The sandstone is very coarse- to medium-grained, well-sorted, and contains occasional lenses of shale rip-up clasts. There are common small iron-oxide concretions. Contorted penecontemporaneous load-deformation structures occur. The upper part of the unit forms steep bench-forming cliffs. Down section, the unit becomes increasingly shaley and slope-forming, composed of stacked sequences of thick mudstone beds and interbedded, laterally discontinuous channel sandstone benches. Orange-brown concretions and fossil wood are present. | White and Palkovic, 2018; Noe et al., 2015 |
| ***Mancos Group*** | Km | **Upper Cretaceous**—Olive-gray to pale-yellowish-brown, non-calcareous, silty to sandy shale is the most prominent in the GMSA. There are four members in addition to the upper part described above: the Sharon Springs Member, a dark-gray to black, organic-rich clay shale. In outcrop, it weathers to mottled pale to moderate red to grayish red. This relatively thin unit is mostly covered by landslides but is well-exposed at a few locations. The Prairie Canyon Member is a light- to medium-gray to pale-yellowish-brown, silty to sandy shale. In outcrop, it weathers to a grayish-orange to grayish-yellow color. This unit forms extensive, residuum-covered outcrops. The Smoky Hill Member consists mainly of dark-gray to light-gray and slightly calcareous to calcareous shale. It crops out extensively just to the north of the Gunnison River. Finally, the Fort Hays Member forms the basal strata of the Niobrara interval and overlies a regional unconformity. It consists of thinly interbedded limestone, marl, and shale beds. | Noe et al., 2015 |
