# Supplementary material
Source: Research Square preprint supplement (doi:10.21203/rs.3.rs-9605703/v1)
Supplement: Supplementary file 2 [file c0ef0c7545ce7a2f5b14e48d.xlsx]

## Sheet: Sheet1
											Appendix A: Grand Mesa Landslide Inventory
Count/FID	Lat	Long	UTM_N	UTM_E	Sector	Region	Varnes	Litho	Hmax_ft	Hmax_m	Hmin_ft	Hmin_m	HΔ_ft	HΔ_m	L_ft	L_m	αpre	αhs	αΔ	Slopepre	Slopehs	SlopeΔ	Heims	Mob	Φinsol	SDS	Style	Agefield	Age14C	Agegeo	Area_m2	Area_km2	V_m3	logV_m3	V_km3	V_Mm3	Remarks
Landslide Count	Latitude (Landslide Runout Deposit Centroid)	Longitude (Landslide Runout Deposit Centroid)	Northing UTM (Zone 12) Centerpoint of Runout	Easting UTM (Zone 12) Centerpoint of Runout	Sector of the Grand Mesa	Region of the Grand Mesa	Mass Wasting Type	Primary Headscarp Lithology	Maximum Headscarp Crown Elevation	Maximum Headscarp Crown Elevation	Runout Deposit Toe Elevation	Runout Deposit Toe Elevation	Difference in Crown and Toe Elevation (Hmax_ft - Hmin_ft)	Difference in Crown and Toe Elevation (Hmax_m - Hmin_m)	Runout Length	Runout Length	Average Aspect of Slope Pre-rupture	Average Aspect of Headscarp Slope	Difference in Pre & Post Rupture Aspect (αhs - αpre)	Average Slope Angle of the Area Adjacent to the Headscarp Pre-rupture	Average Slope Angle of the Headscarp	Difference in Pre & Post Rupture Slope (Slopehs - Slopepre)	Heim's Ratio (HΔ / L)	Mobility Index (L / HΔ)	Annual Insolation (computed for 2013)	Mean Standard Deviation of Slope (proxy for surface roughness)	Style of Activity	Age Estimate by Geologic Mappers	Calibrated Radiocarbon Age or CE Date	Geomorphic Age	Runout Deposit Area	Runout Deposit Area	Runout Volume Estimation (Larsen) V=0.4261×A^(1.2572)	log10 of Runout Volume Estimation (Larsen)	Runout Volume Estimation (Larsen)	Runout Volume Estimation (Larsen) (million meters cubed)	Remarks
n/a	Decimal Degrees	Decimal Degrees	UTMs	UTMs	n/a	n/a	n/a	n/a	ft	m	ft	m	ft	m	ft	m	degrees	degrees	degrees	degrees	degrees	degrees	none	none	kw-hr/m2	degrees	n/a	n/a	2σ cal ybp or CE	n/a	m2	km2	m3	m3	km3	Million m3
1	39.0793	-108.094	4.32969e+06	751501	Palisade North	Mesa Creek Basin	DS	Green River	9577	2919	8670	2643	907	276	2703	824	263	267	4	7	29	22	0.34	2.98	1646	11.17	Complex	Qefr		AR	112904	0.1129	958909	5.9818	0.000959	0.95891	White Slide: South side reactivate in 2008 according to eyewitness account
2	39.0834	-108.091	4.33014e+06	751576	Palisade North	Mesa Creek Basin	DS	Green River	9603	2927	8834	2693	769	234	2959	902	275	280	5	2	16	14	0.26	3.85	1721	9.28	Complex	Qefr		DY	176952	0.177	1687007	6.2271	0.001687	1.68701
3	39.0978	-108.08	4.33169e+06	752516	Palisade North	The Breaks	ES	Green River	9498	2895	8589	2618	909	277	7636	2328	17	12	5	2	15	13	0.12	8.4	1651	10.55	Composite	Qefi		DM	891842	0.8918	12888839	7.1102	0.012889	12.8888
4	39.1066	-108.057	4.33237e+06	754521	Palisade North	Bull Basin	EF	Green River	9447	2879	8023	2445	1424	434	9315	2840	299	307	8	7	21	14	0.15	6.54	1649	11.42	Composite	Qefr		DY	486628	0.4866	6018051	6.7795	0.006018	6.01805
5	39.1042	-108.063	4.33244e+06	754005	Palisade North	Bull Basin	EF	Green River	9441	2878	8342	2543	1099	335	8659	2640	355	344	11	8	18	10	0.13	7.88	1600	11.25	Composite	Qefr		DY	840045	0.84	11954861	7.0775	0.011955	11.9549
6	39.0916	-108.101	4.33093e+06	751225	Palisade North	The Breaks	EF	Green River	9473	2887	7673	2339	1800	549	9984	3044	335	322	13	5	14	9	0.18	5.55	1650	9.78	Composite	Qefi		DM	410038	0.41	4852370	6.686	0.004852	4.85237
7	39.1065	-108.049	4.33253e+06	755234	Palisade North	Bull Basin	EF	Green River	9432	2875	7711	2350	1721	525	7465	2276	326	312	14	9	25	16	0.23	4.34	1555	9.6	Complex	Qefi		DM	244939	0.2449	2538844	6.4046	0.002539	2.53884
8	39.096	-108.065	4.33153e+06	753828	Palisade North	Bull Basin	EF	Green River	9504	2897	9063	2762	441	134	4444	1355	322	339	17	2	21	19	0.1	10.08	1628	8.99	Complex	Qefo		DR	232652	0.2327	2379772	6.3765	0.00238	2.37977
9	39.1047	-108.044	4.33255e+06	755616	Palisade North	Bull Basin	ES	Green River	9300	2835	8951	2728	349	106	1571	479	29	31	2	10	26	16	0.22	4.5	1328	10.22	Complex	Qefi		DM	21618	0.0216	120019	5.0793	0.00012	0.12002
10	39.1051	-108.042	4.33256e+06	755817	Palisade North	Bull Basin	EF	Green River	9269	2825	8710	2655	559	170	1840	561	44	37	7	13	31	18	0.3	3.29	1349	10.6	Complex	Qefi		DM	25640	0.0256	148732	5.1724	0.000149	0.14873
11	39.1137	-108.04	4.33356e+06	755936	Palisade North	Bull Basin	EF	Green River	8417	2566	7958	2426	459	140	2555	779	21	20	1	12	23	11	0.18	5.57	1427	10.44	Single	Qefi		DM	72004	0.072	544732	5.7362	0.000545	0.54473
12	39.1245	-108.049	4.33444e+06	755126	Palisade North	Bull Basin	EF	Green River	7753	2363	7115	2169	638	194	7452	2272	4	18	14	3	14	11	0.09	11.68	1546	11.21	Composite	Qefi		DM	199564	0.1996	1962339	6.2928	0.001962	1.96234
13	39.1133	-108.094	4.33338e+06	751294	Palisade North	The Breaks	EF	Green River	8528	2599	7774	2370	754	230	5966	1819	311	321	10	2	20	18	0.13	7.91	1557	10.07	Complex	Qefi		DM	347590	0.3476	3942231	6.5957	0.003942	3.94223
14	39.1132	-108.002	4.33361e+06	759224	Palisade North	Bull Basin	RS	Green River	9553	2912	7860	2396	1693	516	9292	2833	32	26	6	4	28	24	0.18	5.49	1467	10.14	Composite	Qefo	1321±36	DR	1325780	1.3258	21216933	7.3267	0.021217	21.2169	Cottonwood Creek Slide: Almost certainly older than the 14C date based on extensive revegetation and the shallow 14C sample depth, and sample not from the runout area
15	39.0945	-108.071	4.33135e+06	753340	Palisade North	Bull Basin	DS	Green River	9656	2943	9122	2780	534	163	3651	1113	11	10	1	1	16	15	0.15	6.84	1638	11.66	Composite	Qefr		DY	216874	0.2169	2178673	6.3382	0.002179	2.17867
16	39.1047	-108.037	4.33254e+06	756184	Palisade North	Bull Basin	EF	Green River	9349	2850	8231	2509	1118	341	3431	1046	71	69	2	7	25	18	0.33	3.07	1569	11.02	Composite	Qefi		DM	42437	0.0424	280232	5.4475	0.00028	0.28023
17	39.102	-108.036	4.33231e+06	756357	Palisade North	Bull Basin	EF	Green River	9373	2857	8384	2555	989	301	2480	756	55	53	2	9	34	25	0.4	2.51	1565	8.3	Composite	Qefi		DM	38121	0.0381	244879	5.389	0.000245	0.24488
18	39.1112	-108.077	4.33278e+06	752769	Palisade North	The Breaks	EF	Green River	8791	2679	7960	2426	831	253	5583	1702	30	33	3	7	37	30	0.15	6.72	1441	10.65	Single	Qefi		DM	99708	0.0997	820191	5.9139	0.00082	0.82019
19	39.1119	-108.086	4.33298e+06	752006	Palisade North	The Breaks	EF	Green River	8685	2647	7843	2391	842	257	7820	2384	359	353	6	4	14	10	0.11	9.29	1561	8.86	Single	Qefo		DR	349357	0.3494	3967429	6.5985	0.003967	3.96743
20	39.1241	-108.087	4.33447e+06	751932	Palisade North	The Breaks	ES	Wasatch	7825	2385	7458	2273	367	112	2818	859	353	343	10	2	16	14	0.13	7.68	1497	9.94	Complex	Qefi		DM	96576	0.0966	787935	5.8965	0.000788	0.78794
21	39.1194	-108.082	4.33405e+06	752267	Palisade North	The Breaks	DS	Green River	8174	2491	7729	2356	445	136	2922	891	43	46	3	6	23	17	0.15	6.57	1437	9.1	Single	Qefo		DR	94173	0.0942	763360	5.8827	0.000763	0.76336
22	39.1214	-108.068	4.33437e+06	753458	Palisade North	Bull Basin	EF	Green River	8315	2534	7528	2295	787	240	5150	1570	341	346	5	9	17	8	0.15	6.54	1483	10.92	Single	Qefi		DM	109827	0.1098	926175	5.9667	0.000926	0.92618
23	39.0663	-108.123	4.32808e+06	748926	Palisade North	West Bench	RS	Green River	9401	2865	8653	2637	748	228	2608	795	33	22	11	10	19	9	0.29	3.49	1400	10.52	Successive			DY	69155	0.0692	517775	5.7141	0.000518	0.51778
24	39.0828	-108.117	4.33034e+06	749213	Palisade North	Mesa Creek Basin	EF	Green River	9496	2894	7195	2193	2301	701	19129	5832	301	323	22	8	33	25	0.12	8.31	1546	9.34	Composite	Qefi		DM	2889212	2.8892	56494145	7.752	0.056494	56.4941	Mesa Creek Slide
25	39.0797	-108.133	4.32954e+06	748016	Palisade North	Mesa Creek Basin	EF	Green River	8229	2508	7274	2217	955	291	9417	2871	25	26	1	2	22	20	0.1	9.86	1644	9.89	Complex	Qefr		DY	1200579	1.2006	18729309	7.2725	0.018729	18.7293
26	39.0802	-108.144	4.33031e+06	746805	Palisade North	West Bench	EF	Green River	9326	2843	7084	2159	2242	683	15423	4702	2	356	6	16	40	24	0.15	6.88	1369	10.01	Complex	Qefr	458±108	DY	1639035	1.639	27700780	7.4425	0.027701	27.7008	Powderhorn Slide: reactivated in 2017-2019 as evidenced by road distortion. Likely still moving a few inches a year
27	39.0607	-108.13	4.32744e+06	748294	Palisade North	West Bench	DS	Goodenough	9785	2982	8943	2726	842	257	3496	1066	350	357	7	1	27	26	0.24	4.15	1605	11.2	Composite	Qefr		DY	287105	0.2871	3099986	6.4914	0.0031	3.09999
28	39.0558	-108.148	4.32652e+06	746842	Palisade North	West Bench	EF	Goodenough	9770	2978	8380	2554	1390	424	7495	2285	358	8	10	2	22	20	0.19	5.39	1682	12.07	Composite	Qefr		DY	568881	0.5689	7323596	6.8647	0.007324	7.3236
29	39.0599	-108.148	4.3273e+06	746805	Palisade North	West Bench	RS	Green River	9245	2818	8734	2662	511	156	1994	608	358	5	7	7	24	17	0.26	3.9	1510	11.14	Successive	Qefr		DY	64120	0.0641	470833	5.6729	0.000471	0.47083
30	39.0556	-108.152	4.32677e+06	746423	Palisade North	West Bench	EF	Goodenough	9553	2912	8861	2701	692	211	2558	780	2	357	5	7	43	36	0.27	3.7	1340	11.09	Successive	Qefr		DY	66141	0.0661	489566	5.6898	0.00049	0.48957
31	39.055	-108.155	4.32667e+06	746179	Palisade North	West Bench	EF	Goodenough	9690	2954	8905	2714	785	239	2824	861	43	46	3	9	23	14	0.28	3.6	1563	9.72	Single	Qefr		DY	47856	0.0479	325930	5.5131	0.000326	0.32593
32	39.0576	-108.157	4.32702e+06	746031	Palisade North	West Bench	EF	Green River	9424	2872	8862	2701	562	171	2568	783	20	19	1	7	34	27	0.22	4.57	1238	10.72	Successive	Qefr		DY	74323	0.0743	566871	5.7535	0.000567	0.56687
33	39.0633	-108.157	4.32783e+06	746113	Palisade North	West Bench	EF	Goodenough	9547	2910	8153	2485	1394	425	7085	2160	50	45	5	6	34	28	0.2	5.08	1350	11.12	Composite	Qefr		AR	568470	0.5685	7316945	6.8643	0.007317	7.31695
34	39.0638	-108.172	4.32771e+06	744682	Palisade North	West Bench	RS	Goodenough	9714	2961	8341	2542	1373	418	4592	1400	47	55	8	2	34	32	0.3	3.34	1673	9.63	Single	Qefr		DY	241252	0.2413	2490884	6.3964	0.002491	2.49088
35	39.0599	-108.166	4.32724e+06	745186	Palisade North	West Bench	RS	Goodenough	9748	2971	8393	2558	1355	413	5140	1567	9	14	5	1	25	24	0.26	3.79	1564	10.38	Complex	Qefr		DY	496830	0.4968	6177084	6.7908	0.006177	6.17708
36	39.0615	-108.17	4.32756e+06	744766	Palisade North	West Bench	RS	Goodenough	9587	2922	8804	2683	783	239	2221	677	45	50	5	5	39	34	0.35	2.84	1228	9.75	Composite	Qefr		DY	44180	0.0442	294776	5.4695	0.000295	0.29478
37	39.0677	-108.181	4.32808e+06	743882	Palisade North	West Bench	EF	Goodenough	9694	2955	8280	2524	1414	431	4920	1500	40	45	5	3	34	31	0.29	3.48	1603	9.43	Single	Qefr		DY	542526	0.5425	6899613	6.8388	0.0069	6.89961
38	39.0737	-108.189	4.32871e+06	743142	Palisade North	West Bench	RS	Goodenough	9732	2966	8232	2509	1500	457	5314	1620	32	38	6	4	40	36	0.28	3.54	1681	9.41	Single	Qefr		DY	504917	0.5049	6303754	6.7996	0.006304	6.30375
39	39.0787	-108.193	4.32908e+06	742668	Palisade North	West Bench	RS	Goodenough	9601	2926	8211	2503	1390	424	4579	1396	51	50	1	3	25	22	0.3	3.29	1461	10.39	Single	Qefr		DY	144817	0.1448	1311272	6.1177	0.001311	1.31127
40	39.0888	-108.176	4.33002e+06	743930	Palisade North	Mesa Creek Basin	EF	Green River	8148	2484	7307	2227	841	256	8781	2677	58	62	4	1	20	19	0.1	10.44	1527	12.11	Complex	Qefr		DY	835465	0.8355	11872987	7.0746	0.011873	11.873
41	39.0936	-108.215	4.33086e+06	740879	Palisade North	West Bench	RS	Green River	9601	2926	8487	2587	1114	340	3159	963	65	44	21	1	21	20	0.35	2.84	1510	10.97	Composite	Qefr		DY	153819	0.1538	1414560	6.1506	0.001415	1.41456
42	39.0957	-108.217	4.33093e+06	740642	Palisade North	West Bench	RS	Green River	9603	2927	8130	2478	1473	449	4638	1414	50	58	8	6	34	28	0.32	3.15	1195	9.46	Composite	Qefi		DM	330916	0.3309	3705966	6.5689	0.003706	3.70597
43	39.1083	-108.184	4.33258e+06	743510	Palisade North	Chalk Mountain	EF	Green River	8133	2479	6805	2074	1328	405	13202	4025	20	11	9	3	27	24	0.1	9.94	1516	10.73	Composite	Qefi		DM	1623128	1.6231	27363199	7.4372	0.027363	27.3632
44	39.1057	-108.17	4.33232e+06	744680	Palisade North	Mesa Creek Basin	ES	Wasatch	7260	2213	6906	2105	354	108	1820	555	73	85	12	12	37	25	0.19	5.14	1454	12.24	Successive	Qefr		DY	97084	0.0971	793142	5.8994	0.000793	0.79314
45	39.1053	-108.18	4.33225e+06	743823	Palisade North	Chalk Mountain	EF	Green River	7908	2410	7065	2153	843	257	7275	2218	39	45	6	5	14	9	0.12	8.63	1547	9.71	Single	Qefo		DR	340691	0.3407	3844113	6.5848	0.003844	3.84411
46	39.1009	-108.162	4.33181e+06	745401	Palisade North	Mesa Creek Basin	ES	Wasatch	7310	2228	6741	2055	569	173	6327	1929	23	39	16	6	25	19	0.09	11.12	1519	9.67	Single	Qefi		DM	1186538	1.1865	18454333	7.2661	0.018454	18.4543
47	39.0811	-108.163	4.32961e+06	745397	Palisade North	Mesa Creek Basin	ES	Green River	8214	2504	7367	2245	847	258	9420	2872	63	70	7	1	18	17	0.09	11.12	1531	9.98	Multiple	Qefi		DM	3819883	3.8199	80253654	7.9045	0.080254	80.2536	Little Beaver Creek Slide
48	39.117	-108.226	4.33312e+06	739821	Palisade North	Chalk Mountain	EF	Wasatch	7729	2356	6991	2131	738	225	3428	1045	56	50	6	5	40	35	0.22	4.64	1182	14.49	Single			DY	32796	0.0328	202677	5.3068	0.000203	0.20268
49	39.1837	-107.808	4.34315e+06	775388	Leon Peak North	The Flat Tops	EF	Green River	9443	2878	7439	2267	2004	611	45953	14010	330	333	3	3	22	19	0.04	22.93	1705	9.72	Multiple			DR	8424496	8.4245	216922880	8.3363	0.216923	216.923	Leon Creek Slide
50	39.168	-107.77	4.34039e+06	779097	Leon Peak North	The Flat Tops	ES	Green River	10246	3123	9568	2916	678	207	3683	1123	266	286	20	2	19	17	0.18	5.43	1785	10.7	Complex			DM	193365	0.1934	1886020	6.2755	0.001886	1.88602
51	39.1818	-107.854	4.34167e+06	771787	Leon Peak North	Vega	RS	Green River	9560	2914	7460	2274	2100	640	15439	4707	342	353	11	4	59	55	0.14	7.14	1609	13.57	Composite		2014 CE	AR	2246399	2.2464	41171907	7.6146	0.041172	41.1719	West Salt Creek Slide: Occurred May 2014 and reactivated in 2016.
52	39.1215	-107.784	4.33515e+06	777914	Leon Peak North	The Flat Tops	EF	Green River	10086	3074	9566	2916	520	158	3870	1180	284	273	11	6	20	14	0.13	7.44	1732	11.33	Complex			DM	129711	0.1297	1141683	6.0575	0.001142	1.14168
53	39.0893	-108.241	4.33031e+06	738646	Palisade North	The Blowout	EF	Green River	8565	2611	7803	2378	762	232	5035	1535	355	9	14	16	50	34	0.15	6.61	1443	13.15	Composite	Qefr	3418±52	DY	700007	0.7	9505491	6.978	0.009505	9.50549	Rapid Creek Slide, also called the Thunderbird Landslide Complex
54	39.0934	-108.225	4.33086e+06	739939	Palisade North	The Blowout	RS	Goodenough	9589	2923	9117	2779	472	144	1138	347	331	317	14	3	31	28	0.41	2.41	1247	10.79	Single	Qefr		DY	20487	0.0205	112176	5.0499	0.000112	0.11218
55	39.1069	-108.238	4.33222e+06	738986	Palisade North	The Blowout	EF	Green River	8262	2518	7313	2229	949	289	7587	2313	325	355	30	4	21	17	0.13	7.99	1488	11.47	Single	Qefr		DY	160778	0.1608	1495474	6.1748	0.001495	1.49547
56	38.9877	-108.153	4.31927e+06	746570	Palisade South	Kannah Creek Basin	EF	Green River	9645	2940	7934	2418	1711	522	10138	3091	165	156	9	4	41	37	0.17	5.93	1863	12.92	Complex			AR	905876	0.9059	13144331	7.1187	0.013144	13.1443	Sheep Creek Slide: Pre-1950, reactivated ~1980
57	39.0478	-108.266	4.32567e+06	736665	Palisade South	The Blowout	EF	Wasatch	8812	2686	8263	2519	549	167	3008	917	235	215	20	4	21	17	0.18	5.48	1797	12.51	Composite			DY	54327	0.0543	382269	5.5824	0.000382	0.38227
58	39.0306	-108.249	4.32382e+06	738141	Palisade South	Whitewater Basin	EF	Green River	8296	2529	7596	2315	700	213	2703	824	179	172	7	3	15	12	0.26	3.86	1718	10.46	Successive			DM	116559	0.1166	998095	5.9992	0.000998	0.9981
59	39.0357	-108.267	4.32448e+06	736689	Palisade South	Whitewater Basin	RS	Wasatch	8611	2625	7121	2170	1490	454	3674	1120	208	222	14	3	27	24	0.41	2.47	1781	8.41	Single			DM	113899	0.1139	969542	5.9866	0.00097	0.96954
60	39.1576	-107.82	4.33904e+06	774549	Leon Peak North	Vega	EF	Goodenough	9977	3041	9017	2748	960	293	6340	1933	26	23	3	2	21	19	0.15	6.6	1647	10.23	Multiple			DM	256735	0.2567	2693490	6.4303	0.002693	2.69349
61	39.2025	-107.958	4.34342e+06	762926	Palisade North	Kansas Mesa	EF	Wasatch	7036	2145	6281	1914	755	230	16062	4897	8	4	4	4	13	9	0.05	21.27	1512	6.17	Successive			DR	1582380	1.5824	26502398	7.4233	0.026502	26.5024
62	39.1682	-107.834	4.34005e+06	773470	Leon Peak North	Vega	EF	Green River	9802	2988	8848	2697	954	291	3779	1152	5	3	2	2	20	18	0.25	3.96	1718	10.37	Single			DM	86408	0.0864	685089	5.8357	0.000685	0.68509
63	39.1635	-107.869	4.33972e+06	770233	Leon Peak North	Horse Mountain	EF	Green River	9315	2839	8082	2463	1233	376	4198	1280	304	302	2	15	27	12	0.29	3.41	1410	10.63	Single			DR	163969	0.164	1532890	6.1855	0.001533	1.53289
64	39.1648	-107.891	4.33986e+06	768583	Leon Peak North	Horse Mountain	EF	Green River	9801	2987	7236	2206	2565	782	17049	5198	2	12	10	7	34	27	0.15	6.65	1666	10.25	Single			DR	1291664	1.2917	20532835	7.3124	0.020533	20.5328
65	39.1634	-107.915	4.33948e+06	766449	Leon Peak North	Horse Mountain	EF	Green River	7919	2414	7427	2264	492	150	2880	878	316	313	3	8	35	27	0.17	5.85	1485	13.1	Single			DM	62257	0.0623	453695	5.6568	0.000454	0.4537
66	39.1686	-107.91	4.34004e+06	766991	Leon Peak North	Horse Mountain	DS	Green River	7877	2401	7596	2315	281	86	1525	465	298	302	4	8	38	30	0.18	5.43	1309	12.89	Single			DM	48440	0.0484	330944	5.5198	0.000331	0.33094
67	39.2013	-108.03	4.34333e+06	756507	Palisade North	Mormon Mesa	ES	Wasatch	6460	1969	6290	1917	170	52	1102	336	317	312	5	9	18	9	0.15	6.48	1449	12.68	Successive			DY	9484	0.0095	42599	4.6294	4.3e-05	0.0426
68	39.1914	-108.032	4.34222e+06	756315	Palisade North	Mormon Mesa	ES	Wasatch	6551	1997	6374	1943	177	54	1014	309	259	240	19	5	21	16	0.17	5.73	1591	13.1	Successive			DY	25297	0.0253	146238	5.1651	0.000146	0.14624
69	39.185	-108.022	4.34153e+06	757235	Palisade North	Mormon Mesa	ES	Wasatch	6736	2053	6432	1960	304	93	1742	531	223	233	10	2	42	40	0.17	5.73	1536	13.92	Complex			DY	95722	0.0957	779185	5.8916	0.000779	0.77919
70	39.1838	-108.007	4.34147e+06	758445	Palisade North	Mormon Mesa	ES	Wasatch	6821	2079	6663	2031	158	48	948	289	38	39	1	3	21	18	0.17	6	1460	13.29	Complex			DY	30663	0.0307	186245	5.2701	0.000186	0.18625
71	39.1831	-108.003	4.34137e+06	758864	Palisade North	Mormon Mesa	ES	Wasatch	6733	2052	6661	2030	72	22	590	180	12	21	9	4	11	7	0.12	8.2	1477	13.11	Single			DY	7287	0.0073	30585	4.4855	3.1e-05	0.03059
72	39.1816	-108	4.34121e+06	759097	Palisade North	Mormon Mesa	ES	Wasatch	6755	2059	6622	2018	133	41	777	237	98	97	1	2	15	13	0.17	5.84	1518	13.28	Single			DY	12283	0.0123	58963	4.7706	5.9e-05	0.05896
73	39.1797	-108.001	4.341e+06	759074	Palisade North	Mormon Mesa	ES	Wasatch	6760	2060	6666	2032	94	29	577	176	111	93	18	5	14	9	0.16	6.14	1535	12.66	Single			DY	6382	0.0064	25888	4.4131	2.6e-05	0.02589
74	39.1903	-108.011	4.34216e+06	758166	Palisade North	Mormon Mesa	ES	Wasatch	6674	2034	6534	1992	140	43	1014	309	33	27	6	2	15	13	0.14	7.24	1482	13.72	Single			DY	17770	0.0178	93805	4.9722	9.4e-05	0.09381
75	39.1918	-108.012	4.34231e+06	758064	Palisade North	Mormon Mesa	ES	Wasatch	6679	2036	6532	1991	147	45	1000	305	55	57	2	3	30	27	0.15	6.81	1521	13.47	Successive			DY	20618	0.0206	113078	5.0534	0.000113	0.11308
76	39.1995	-108.012	4.34317e+06	758007	Palisade North	Mormon Mesa	ES	Wasatch	6592	2009	6451	1966	141	43	1230	375	89	97	8	2	21	19	0.11	8.72	1504	13.44	Composite			DY	45352	0.0454	304635	5.4838	0.000305	0.30464
77	39.214	-108.005	4.34481e+06	758601	Palisade North	Kansas Mesa	DS	Wasatch	6239	1902	5955	1815	284	87	1581	482	286	273	13	6	30	24	0.18	5.57	1386	13.81	Composite			DY	51603	0.0516	358334	5.5543	0.000358	0.35833
78	39.2153	-108.007	4.34494e+06	758428	Palisade North	Kansas Mesa	DS	Wasatch	6175	1882	5979	1822	196	60	945	288	255	238	17	12	21	9	0.21	4.82	1396	14.42	Composite			DY	13277	0.0133	65024	4.8131	6.5e-05	0.06502
79	39.2111	-108.028	4.34441e+06	756567	Palisade North	Mormon Mesa	EF	Wasatch	6193	1888	5707	1739	486	148	2040	622	319	321	2	3	41	38	0.24	4.2	1440	11.8	Complex			DY	29011	0.029	173719	5.2398	0.000174	0.17372
80	39.2122	-108.027	4.34453e+06	756670	Palisade North	Mormon Mesa	EF	Wasatch	6154	1876	5740	1750	414	126	2135	651	320	325	5	5	33	28	0.19	5.16	1256	12.86	Complex			DY	30469	0.0305	184767	5.2666	0.000185	0.18477
81	39.2124	-108.023	4.34457e+06	757033	Palisade North	Mormon Mesa	ES	Wasatch	6224	1897	6082	1854	142	43	968	295	336	343	7	2	30	28	0.15	6.81	1212	14.3	Single			DY	23659	0.0237	134432	5.1285	0.000134	0.13443
82	39.2149	-108.027	4.34484e+06	756662	Palisade North	Mormon Mesa	EF	Wasatch	6062	1848	5618	1712	444	135	1676	511	319	301	18	8	18	10	0.26	3.77	1470	11.41	Complex			DY	40231	0.0402	262043	5.4184	0.000262	0.26204
83	39.2179	-108.01	4.34522e+06	758126	Palisade North	Kansas Mesa	DS	Wasatch	6120	1865	5933	1808	187	57	1260	384	277	268	9	2	24	22	0.15	6.74	1386	13.85	Single			DY	37027	0.037	236074	5.373	0.000236	0.23607
84	38.8978	-108.194	4.30918e+06	743383	Flowing Park Northwest	Indian Point	RS	Wasatch	9422	2872	7665	2336	1757	536	8544	2605	263	277	14	3	34	31	0.21	4.86	1709	11.26	Successive			DM	485981	0.486	6007990	6.7787	0.006008	6.00799
85	39.1579	-108.051	4.33844e+06	754823	Palisade North	Georgia Mesa	ES	Wasatch	6640	2024	6418	1956	222	68	1433	437	89	93	4	5	21	16	0.15	6.46	1466	10.74	Single			DY	83191	0.0832	653177	5.815	0.000653	0.65318
86	39.1584	-108.055	4.33849e+06	754502	Palisade North	Georgia Mesa	ES	Wasatch	6698	2042	6445	1964	253	77	2234	681	24	16	8	5	30	25	0.11	8.83	1484	9.12	Single			DM	112777	0.1128	957555	5.9812	0.000958	0.95756
87	39.1416	-108.105	4.33622e+06	750394	Palisade North	The Breaks	EF	Wasatch	7135	2175	6557	1999	578	176	5058	1542	249	255	6	3	16	13	0.11	8.75	1531	9.21	Single			DR	93400	0.0934	755497	5.8782	0.000755	0.7555
88	39.0957	-107.977	4.3318e+06	761458	Palisade North	Horse Mountain	EF	Green River	9768	2977	9134	2784	634	193	4576	1395	46	70	24	8	32	24	0.14	7.22	1611	13.27	Single			DY	157420	0.1574	1456319	6.1633	0.001456	1.45632
89	39.0965	-107.965	4.33187e+06	762473	Palisade North	Horse Mountain	EF	Goodenough	9613	2930	9415	2870	198	60	1696	517	308	336	28	6	22	16	0.12	8.56	1711	12.57	Single			DM	17743	0.0177	93625	4.9714	9.4e-05	0.09363
90	39.0933	-108.238	4.33076e+06	738891	Palisade North	The Blowout	DS	Green River	8699	2651	8084	2464	615	187	2657	810	277	264	13	11	30	19	0.23	4.32	1649	11.68	Single	Qlsu		DM	163085	0.1631	1522503	6.1826	0.001523	1.5225
91	39.0759	-108.299	4.32867e+06	733633	Palisade North	The Blowout	EF	Mesaverde	6539	1993	6033	1839	506	154	1414	431	288	267	21	13	71	58	0.36	2.79	1346	10.52	Complex			DM	35694	0.0357	225440	5.353	0.000225	0.22544
92	38.9819	-108.272	4.31831e+06	736261	Palisade South	Coal Creek Basin	DS	Mancos	6185	1885	5887	1794	298	91	2453	748	251	220	31	4	29	25	0.12	8.23	1554	10.55	Single			DY	80743	0.0807	629109	5.7987	0.000629	0.62911
93	38.9794	-108.271	4.31803e+06	736419	Palisade South	Coal Creek Basin	DS	Mancos	6145	1873	5878	1792	267	81	1666	508	237	257	20	3	26	23	0.16	6.24	1523	10.17	Single			DY	31737	0.0317	194479	5.2889	0.000194	0.19448
94	38.9076	-108.198	4.31046e+06	743326	Flowing Park Northwest	Indian Point	RS-DS	Green River	9614	2930	6468	1971	3146	959	20349	6204	280	271	9	8	29	21	0.15	6.47	1741	12.25	Composite			DM	2264564	2.2646	41590888	7.619	0.041591	41.5909	Deer Creek Slide
95	38.9271	-108.048	4.31283e+06	755887	Flowing Park Southeast	Hells Kitchen	DS	Wasatch	8205	2501	7987	2434	218	66	958	292	73	99	26	7	28	21	0.23	4.39	1527	10.14	Single			DR	26203	0.0262	152845	5.1843	0.000153	0.15285
96	38.9423	-108.03	4.31457e+06	757447	Flowing Park Southeast	Hells Kitchen	DS	Mesaverde	7194	2193	6962	2122	232	71	1220	372	151	172	21	7	35	28	0.19	5.26	1740	7.32	Single			DR	37285	0.0373	238147	5.3768	0.000238	0.23815
97	39.1162	-108.27	4.33323e+06	736019	Palisade North	Chalk Mountain	DS	Mesaverde	6515	1986	6176	1882	339	103	1020	311	339	325	14	8	51	43	0.33	3.01	1382	12.09	Single			DR	34669	0.0347	217333	5.3371	0.000217	0.21733
98	39.0818	-107.918	4.33037e+06	766634	Palisade North	Horse Mountain	RS-DS	Basalt	10603	3232	9997	3047	606	185	5724	1745	42	55	13	5	39	34	0.11	9.44	1693	9.4	Multiple			DM	699426	0.6994	9495574	6.9775	0.009496	9.49557
99	39.1335	-107.942	4.33592e+06	764342	Palisade North	Horse Mountain	EF	Green River	9598	2925	8209	2502	1389	423	6016	1834	335	345	10	2	22	20	0.23	4.33	1623	10.98	Single			DM	351538	0.3515	3998594	6.6019	0.003999	3.99859
100	39.1314	-107.931	4.33578e+06	765299	Palisade North	Horse Mountain	EF	Green River	9603	2927	8558	2608	1045	319	4513	1376	76	58	18	2	27	25	0.23	4.32	1418	11.51	Single			DM	140110	0.1401	1257917	6.0997	0.001258	1.25792
101	39.1454	-107.899	4.33714e+06	768425	Leon Peak North	Horse Mountain	EF	Green River	9841	3000	8170	2490	1671	509	10266	3130	310	294	16	1	17	16	0.16	6.14	1733	10.55	Complex			DM	1255719	1.2557	19817055	7.297	0.019817	19.8171
102	39	-108.297	4.32025e+06	734038	Palisade South	Whitewater Basin	DS	Mancos	6145	1873	5683	1732	462	141	3034	925	293	310	17	2	24	22	0.15	6.57	1548	8.98	Single			DM	590637	0.5906	7677430	6.8852	0.007677	7.67743
103	39.0118	-108.247	4.32169e+06	738324	Palisade South	Whitewater Basin	ES	Wasatch	8230	2509	7931	2417	299	91	1378	420	276	252	24	6	30	24	0.22	4.61	1512	9.8	Single			DR	47904	0.0479	326347	5.5137	0.000326	0.32635
104	39.1341	-108.094	4.33568e+06	751186	Palisade North	The Breaks	EF	Wasatch	7588	2313	6614	2016	974	297	9086	2770	17	31	14	9	26	17	0.11	9.33	1509	8.99	Multiple			DR	722234	0.7222	9886477	6.995	0.009886	9.88648
105	38.8959	-107.998	4.30951e+06	760393	Flowing Park Southeast	Hells Kitchen	ES	Mancos	6056	1846	5894	1796	162	49	882	269	240	221	19	4	20	16	0.18	5.45	1555	9.26	Single			DY	23439	0.0234	132861	5.1234	0.000133	0.13286
106	38.897	-107.999	4.30963e+06	760232	Flowing Park Southeast	Hells Kitchen	ES	Mancos	6072	1851	5933	1808	139	42	653	199	171	177	6	2	12	10	0.21	4.7	1571	12.62	Multiple			DY	8045	0.008	34638	4.5396	3.5e-05	0.03464
107	38.8973	-108.001	4.30965e+06	760081	Flowing Park Southeast	Hells Kitchen	ES	Mancos	6086	1855	5870	1789	216	66	751	229	184	201	17	3	13	10	0.29	3.48	1556	10.65	Single			DY	20644	0.0206	113255	5.0541	0.000113	0.11326
108	38.8978	-108.003	4.30971e+06	759944	Flowing Park Southeast	Hells Kitchen	ES	Mancos	6101	1860	5895	1797	206	63	672	205	199	201	2	5	11	6	0.31	3.26	1587	11.38	Single			DY	12174	0.0122	58309	4.7657	5.8e-05	0.05831
109	38.8965	-107.973	4.30965e+06	762538	Flowing Park Southeast	Bluenose Mesa	ES	Mancos	5923	1805	5691	1735	232	71	836	255	148	149	1	3	35	32	0.28	3.61	1573	10.7	Single			DY	20898	0.0209	115012	5.0607	0.000115	0.11501
110	38.9	-107.971	4.31004e+06	762658	Flowing Park Southeast	Bluenose Mesa	ES	Mancos	5991	1826	5877	1791	114	35	548	167	121	125	4	2	10	8	0.21	4.8	1562	12.55	Multiple			DY	48055	0.0481	327635	5.5154	0.000328	0.32764
111	38.9064	-107.971	4.31075e+06	762676	Flowing Park Southeast	Bluenose Mesa	ES	Mancos	6075	1852	5941	1811	134	41	604	184	115	116	1	3	23	20	0.22	4.5	1571	13.62	Multiple			DY	30022	0.03	181360	5.2585	0.000181	0.18136
112	38.9081	-107.971	4.31094e+06	762629	Flowing Park Southeast	Bluenose Mesa	ES	Mancos	6081	1853	5974	1821	107	33	584	178	86	92	6	4	11	7	0.18	5.46	1518	10.88	Single			DM	12889	0.0129	62644	4.7969	6.3e-05	0.06264
113	38.9096	-107.972	4.3111e+06	762602	Flowing Park Southeast	Bluenose Mesa	ES	Mancos	6110	1862	6001	1829	109	33	554	169	107	99	8	3	22	19	0.2	5.09	1532	10.35	Single			DM	13012	0.013	63397	4.8021	6.3e-05	0.0634
114	38.9105	-107.972	4.3112e+06	762556	Flowing Park Southeast	Bluenose Mesa	ES	Mancos	6115	1864	6011	1832	104	32	508	155	81	90	9	3	10	7	0.2	4.89	1512	12.25	Single			DY	10090	0.0101	46045	4.6632	4.6e-05	0.04605
115	38.9687	-107.932	4.31769e+06	765715	Flowing Park Southeast	Happy Hollow Gulch	ES	Wasatch	7914	2412	7160	2182	754	230	4218	1286	177	174	3	3	14	11	0.18	5.59	1634	8.35	Single			DM	500621	0.5006	6236405	6.7949	0.006236	6.23641
116	39.0441	-107.894	4.32627e+06	768816	Leon Peak South	Southeast Bench	RS	Goodenough	10478	3194	10067	3068	411	125	3772	1150	109	110	1	1	29	28	0.11	9.18	1721	11.39	Complex			DM	270892	0.2709	2881529	6.4596	0.002882	2.88153
117	39.1416	-107.872	4.33715e+06	770319	Leon Peak North	Horse Mountain	EF	Goodenough	10144	3092	9115	2778	1029	314	6199	1890	27	50	23	4	30	26	0.17	6.02	1753	11.06	Single			DM	667749	0.6677	8958090	6.9522	0.008958	8.95809
118	39.1504	-107.865	4.33815e+06	770907	Leon Peak North	Horse Mountain	EF	Green River	9792	2985	9016	2748	776	237	4231	1290	2	3	1	3	15	12	0.18	5.45	1610	12	Single			DM	147306	0.1473	1339674	6.127	0.00134	1.33967
119	39.1578	-107.879	4.33893e+06	769704	Leon Peak North	Horse Mountain	EF	Green River	8798	2682	8644	2635	154	47	643	196	322	325	3	4	24	20	0.24	4.17	1389	10.41	Single			DY	10336	0.0103	47464	4.6764	4.7e-05	0.04746
120	39.1559	-107.878	4.33872e+06	769766	Leon Peak North	Horse Mountain	EF	Green River	9148	2788	8792	2680	356	109	1627	496	329	315	14	12	30	18	0.22	4.57	1252	11.37	Single			DY	23058	0.0231	130150	5.1144	0.00013	0.13015
121	39.1221	-107.971	4.3347e+06	761844	Palisade North	Horse Mountain	EF	Green River	9471	2887	8886	2708	585	178	2309	704	254	272	18	2	12	10	0.25	3.95	1743	10.35	Single			DR	47773	0.0478	325218	5.5122	0.000325	0.32522
122	39.1198	-107.969	4.33444e+06	762018	Palisade North	Horse Mountain	EF	Goodenough	9567	2916	9086	2769	481	147	3090	942	300	287	13	3	11	8	0.16	6.42	1684	11.13	Single			DM	75754	0.0758	580632	5.7639	0.000581	0.58063
123	39.1718	-107.878	4.34049e+06	769717	Leon Peak North	Horse Mountain	DS	Green River	8063	2458	7811	2381	252	77	774	236	271	281	10	29	37	8	0.33	3.07	1483	13.62	Single			DM	9414	0.0094	42203	4.6253	4.2e-05	0.0422
124	39.1693	-107.878	4.3402e+06	769716	Leon Peak North	Horse Mountain	EF	Green River	8073	2461	7816	2382	257	78	768	234	246	264	18	18	24	6	0.33	2.99	1716	12.43	Single			DM	6136	0.0061	24639	4.3916	2.5e-05	0.02464
125	39.2058	-107.891	4.34422e+06	768422	Leon Peak North	Kansas Mesa	EF	Green River	7817	2383	7066	2154	751	229	3992	1217	298	272	26	3	22	19	0.19	5.32	1487	10.72	Single			DR	363375	0.3634	4168590	6.62	0.004169	4.16859
126	39.2375	-107.847	4.34788e+06	772168	Leon Peak North	Vega	ES	Wasatch	7685	2342	7532	2296	153	47	735	224	328	331	3	22	37	15	0.21	4.8	1255	14	Single			DY	8588	0.0086	37599	4.5752	3.8e-05	0.0376
127	39.1678	-107.958	4.3398e+06	762780	Palisade North	Kansas Mesa	DS	Wasatch	7639	2328	7179	2188	460	140	1666	508	251	267	16	6	31	25	0.28	3.62	1605	11.3	Single			DY	39349	0.0393	254837	5.4063	0.000255	0.25484
128	39.1711	-107.964	4.34016e+06	762307	Palisade North	Kansas Mesa	DS	Wasatch	7286	2221	7022	2140	264	80	1227	374	228	254	26	20	24	4	0.22	4.65	1614	12.34	Single			DY	17749	0.0177	93663	4.9716	9.4e-05	0.09366
129	39.1715	-107.966	4.34019e+06	762072	Palisade North	Kansas Mesa	DS	Wasatch	7087	2160	6856	2090	231	70	1794	547	244	233	11	3	18	15	0.13	7.77	1622	9.81	Single			DM	46059	0.0461	310622	5.4922	0.000311	0.31062
130	39.1733	-107.967	4.34039e+06	762002	Palisade North	Kansas Mesa	DS	Wasatch	7093	2162	6938	2115	155	47	436	133	222	250	28	21	34	13	0.36	2.81	1626	11.96	Single			DY	3479	0.0035	12075	4.0819	1.2e-05	0.01208
131	39.1728	-107.959	4.34034e+06	762695	Palisade North	Kansas Mesa	DS	Wasatch	7563	2305	7385	2251	178	54	1453	443	287	317	30	9	21	12	0.12	8.16	1477	9.87	Single			DM	28743	0.0287	171703	5.2348	0.000172	0.1717
132	39.1812	-107.968	4.34127e+06	761937	Palisade North	Kansas Mesa	DS	Wasatch	7082	2159	6946	2117	136	41	872	266	264	273	9	6	20	14	0.16	6.42	1553	10.7	Multiple			DY	31748	0.0317	194564	5.2891	0.000195	0.19456
133	39.1968	-107.998	4.34291e+06	759210	Palisade North	Kansas Mesa	DS	Wasatch	6501	1982	6369	1941	132	40	1079	329	269	280	11	5	17	12	0.12	8.18	1531	11.95	Multiple			DY	43663	0.0437	290442	5.4631	0.00029	0.29044
134	39.1991	-107.999	4.34316e+06	759172	Palisade North	Kansas Mesa	DS	Wasatch	6445	1964	6340	1932	105	32	485	148	283	274	9	2	15	13	0.22	4.62	1538	11.32	Single			DM	9996	0.01	45507	4.6581	4.6e-05	0.04551
135	39.2035	-107.998	4.34366e+06	759188	Palisade North	Kansas Mesa	DS	Wasatch	6454	1967	6304	1921	150	46	626	191	285	279	6	3	24	21	0.24	4.18	1527	14.73	Successive			DY	17702	0.0177	93353	4.9701	9.3e-05	0.09335
136	39.2133	-108.013	4.3447e+06	757897	Palisade North	Mormon Mesa	DS	Wasatch	6218	1895	6155	1876	63	19	364	111	67	73	6	5	13	8	0.17	5.78	1423	13.32	Single			DM	5184	0.0052	19933	4.2996	2e-05	0.01993
137	39.0955	-108.034	4.33156e+06	756551	Palisade North	Bull Basin	ES	Green River	9763	2976	8506	2593	1257	383	9522	2903	343	348	5	3	33	30	0.13	7.58	1686	11.44	Composite	Qefr	15729±107 and 29786±386	DY	422025	0.422	5031381	6.7017	0.005031	5.03138	Bull Creek Slide 14C dates are for the slump benches, not the landslide deposit. Likely the landslide occurred after the last bench slump initiated. Sometime after 15729±170
138	39.1037	-107.971	4.33263e+06	761975	Palisade North	Horse Mountain	EF	Goodenough	9545	2909	8920	2719	625	191	3132	955	288	316	28	6	25	19	0.2	5.01	1654	11.03	Successive			DM	96597	0.0966	788149	5.8966	0.000788	0.78815
139	39.1048	-107.957	4.33283e+06	763288	Palisade North	Horse Mountain	EF	Goodenough	9838	2999	9686	2952	152	46	2690	820	229	212	17	4	7	3	0.06	17.69	1807	7.13	Single			DM	38056	0.0381	244355	5.388	0.000244	0.24436
140	39.1238	-107.918	4.33504e+06	766457	Palisade North	Horse Mountain	EF	Green River	9712	2960	8859	2700	853	260	3608	1100	61	70	9	3	29	26	0.24	4.23	1768	10.09	Single			DM	290929	0.2909	3151988	6.4986	0.003152	3.15199
141	39.0906	-107.936	4.33127e+06	764949	Palisade North	Horse Mountain	EF	Goodenough	10418	3175	10071	3070	347	106	2017	615	285	280	5	6	20	14	0.17	5.81	1707	11.6	Single			DM	38337	0.0383	246627	5.392	0.000247	0.24663
142	39.0927	-107.937	4.33154e+06	764962	Palisade North	Horse Mountain	EF	Goodenough	10309	3142	10071	3070	238	73	1420	433	283	245	38	3	30	27	0.17	5.97	1844	10.68	Single			DM	19309	0.0193	104131	5.0176	0.000104	0.10413
143	38.9426	-108.083	4.31446e+06	752787	Flowing Park Southeast	Hells Kitchen	EF	Wasatch	9080	2768	8746	2666	334	102	2139	652	125	121	4	2	15	13	0.16	6.4	1763	10.41	Multiple			DM	182859	0.1829	1758105	6.245	0.001758	1.75811
144	38.9447	-108.077	4.3147e+06	753302	Flowing Park Southeast	Hells Kitchen	DS	Wasatch	8970	2734	8473	2583	497	151	4369	1332	112	114	2	5	13	8	0.11	8.79	1698	11.32	Successive			DM	201077	0.2011	1981061	6.2969	0.001981	1.98106
145	38.9425	-108.099	4.3144e+06	751401	Flowing Park Southeast	Hells Kitchen	RS	Basalt	9946	3032	9304	2836	642	196	2857	871	141	127	14	2	19	17	0.22	4.45	1798	10.24	Multiple			DY	63174	0.0632	462110	5.6647	0.000462	0.46211
146	38.9727	-108.07	4.31783e+06	753850	Flowing Park Southeast	Southeast Bench	EF	Green River	9918	3023	9208	2807	710	216	3857	1176	161	153	8	6	18	12	0.18	5.43	1733	9.18	Successive			DM	208085	0.2081	2068254	6.3156	0.002068	2.06825
147	38.9749	-108.051	4.31813e+06	755497	Flowing Park Southeast	Southeast Bench	EF	Green River	9164	2793	8834	2693	330	101	2368	722	151	138	13	18	32	14	0.14	7.18	1798	10.04	Complex			DR	91367	0.0914	734875	5.8662	0.000735	0.73488
148	38.9641	-108.034	4.31698e+06	756977	Flowing Park Southeast	Southeast Bench	DS	Wasatch	8530	2600	8358	2548	172	52	741	226	204	212	8	12	19	7	0.23	4.31	1794	11.48	Single			DM	7410	0.0074	31233	4.4946	3.1e-05	0.03123
149	38.8969	-107.977	4.30968e+06	762215	Flowing Park Southeast	Bluenose Mesa	ES	Mancos	5961	1817	5679	1731	282	86	827	252	242	252	10	5	30	25	0.34	2.93	1545	10.14	Successive			DY	12423	0.0124	59807	4.7768	6e-05	0.05981
150	38.8985	-107.978	4.30986e+06	762107	Flowing Park Southeast	Bluenose Mesa	ES	Mancos	5977	1822	5681	1732	296	90	751	229	204	219	15	3	30	27	0.39	2.54	1555	9.71	Successive			DY	44659	0.0447	298800	5.4754	0.000299	0.2988
151	38.9018	-107.98	4.31021e+06	761884	Flowing Park Southeast	Bluenose Mesa	ES	Mancos	6002	1829	5700	1737	302	92	686	209	257	259	2	2	40	38	0.44	2.27	1520	9.24	Successive			DY	44826	0.0448	300200	5.4774	0.0003	0.3002
152	38.9045	-107.981	4.31052e+06	761798	Flowing Park Southeast	Bluenose Mesa	ES	Mancos	6041	1841	5733	1747	308	94	813	248	255	251	4	3	20	17	0.38	2.64	1547	10.75	Successive			DY	44214	0.0442	295057	5.4699	0.000295	0.29506
153	38.9062	-107.981	4.3107e+06	761783	Flowing Park Southeast	Bluenose Mesa	ES	Mancos	6051	1844	5753	1754	298	91	748	228	257	265	8	3	20	17	0.4	2.51	1530	10.9	Successive			DY	27457	0.0275	162101	5.2098	0.000162	0.1621
154	38.9093	-107.981	4.31104e+06	761802	Flowing Park Southeast	Bluenose Mesa	ES	Mancos	6103	1860	5788	1764	315	96	932	284	241	254	13	6	24	18	0.34	2.96	1584	10.04	Composite			DY	21783	0.0218	121170	5.0834	0.000121	0.12117
155	38.9119	-107.981	4.31227e+06	762298	Flowing Park Southeast	Bluenose Mesa	ES	Mancos	6254	1906	6142	1872	112	34	469	143	73	72	1	8	21	13	0.24	4.19	1514	10.24	Single			DM	3584	0.0036	12534	4.0981	1.3e-05	0.01253
156	38.9202	-107.975	4.31232e+06	764003	Flowing Park Southeast	Happy Hollow Gulch	EF	Mancos	6262	1909	6090	1856	172	52	754	230	319	329	10	5	12	7	0.23	4.39	1476	11.57	Complex			DY	22711	0.0227	127697	5.1062	0.000128	0.1277
157	38.9201	-107.955	4.32307e+06	778624	Leon Peak South	Durkee Ridge	EF	Green River	10524	3208	10047	3062	477	145	2034	620	173	186	13	17	25	8	0.23	4.26	1918	9.46	Single			DM	16619	0.0166	86227	4.9356	8.6e-05	0.08623
158	39.0123	-107.782	4.32278e+06	778068	Leon Peak South	Durkee Ridge	EF	Green River	10164	3098	9816	2992	348	106	1699	518	199	226	27	15	23	8	0.2	4.88	1904	10.69	Single			DM	21942	0.0219	122285	5.0874	0.000122	0.12229
159	39.0099	-107.789	4.32273e+06	777732	Leon Peak South	Durkee Ridge	ES	Wasatch	9998	3047	9711	2960	287	87	1722	525	254	244	10	11	15	4	0.17	6	1817	9.85	Successive			DR	44017	0.044	293406	5.4675	0.000293	0.29341
160	39.0098	-107.792	4.32313e+06	778194	Leon Peak South	Durkee Ridge	ES	Green River	10462	3189	10185	3104	277	84	1200	366	236	233	3	16	32	16	0.23	4.33	1888	7.92	Single			DM	33807	0.0338	210565	5.3234	0.000211	0.21057
161	39.013	-107.787	4.32336e+06	778800	Leon Peak South	Durkee Ridge	DS	Goodenough	10571	3222	10217	3114	354	108	1840	561	116	114	2	12	19	7	0.19	5.2	1827	9.91	Successive			DM	68175	0.0682	508566	5.7063	0.000509	0.50857
162	39.0144	-107.78	4.32353e+06	777730	Leon Peak South	Durkee Ridge	RS	Green River	10472	3192	9787	2983	685	209	3168	966	254	256	2	11	18	7	0.22	4.63	1789	11.22	Successive			DM	223842	0.2238	2267037	6.3555	0.002267	2.26704
163	39.0178	-107.792	4.32411e+06	777753	Leon Peak South	Durkee Ridge	RS	Green River	10411	3173	9806	2989	605	184	2457	749	284	267	17	7	20	13	0.25	4.06	1721	10.36	Successive			DM	198540	0.1985	1949693	6.29	0.00195	1.94969
164	39.0222	-107.792	4.33632e+06	767427	Leon Peak North	Horse Mountain	EF	Green River	9772	2979	8740	2664	1032	315	5740	1750	232	209	23	4	11	7	0.18	5.56	1727	11.35	Multiple			DM	284148	0.2841	3059907	6.4857	0.00306	3.05991
165	39.1359	-107.91	4.33598e+06	762196	Palisade North	Kansas Mesa	EF	Green River	9477	2889	8255	2516	1222	372	3119	951	315	329	14	1	33	32	0.39	2.55	1569	8.03	Single			DM	77919	0.0779	601572	5.7793	0.000602	0.60157
166	39.1335	-107.967	4.3374e+06	755879	Palisade North	Bull Basin	ES	Wasatch	7003	2135	6928	2112	75	23	574	175	271	266	5	6	14	8	0.13	7.65	1546	11.9	Complex			DY	8968	0.009	39703	4.5988	4e-05	0.0397
167	39.1482	-108.039	4.33706e+06	756125	Palisade North	Bull Basin	ES	Wasatch	7138	2176	7024	2141	114	35	715	218	254	250	4	2	17	15	0.16	6.27	1555	12.66	Complex			DY	17210	0.0172	90100	4.9547	9e-05	0.0901
168	39.145	-108.036	4.33834e+06	755356	Palisade North	Georgia Mesa	ES	Wasatch	6774	2065	6544	1995	230	70	1692	516	302	294	8	4	10	6	0.14	7.36	1509	12.63	Multiple			DM	31581	0.0316	193280	5.2862	0.000193	0.19328
169	39.1568	-108.045	4.334e+06	761961	Palisade North	Horse Mountain	EF	Green River	9491	2893	8901	2713	590	180	2109	643	271	262	9	5	10	5	0.28	3.57	1634	10.68	Complex			DR	29344	0.0293	176226	5.2461	0.000176	0.17623
170	39.116	-107.971	4.33441e+06	761132	Palisade North	Horse Mountain	EF	Green River	8760	2670	8201	2500	559	170	2637	804	267	232	35	21	30	9	0.21	4.72	1585	11.64	Single			DR	54174	0.0542	380922	5.5808	0.000381	0.38092
171	39.1197	-107.98	4.3337e+06	761639	Palisade North	Horse Mountain	DS	Green River	9483	2890	8406	2562	1077	328	4503	1373	244	249	5	5	22	17	0.24	4.18	1804	10.39	Composite			DY	313987	0.314	3469202	6.5402	0.003469	3.4692
172	39.1132	-107.974	4.333e+06	762299	Palisade North	Horse Mountain	EF	Goodenough	9616	2931	8779	2676	837	255	4950	1509	264	282	18	6	26	20	0.17	5.91	1637	11.32	Complex			DM	200053	0.2001	1968395	6.2941	0.001968	1.9684
173	39.1064	-107.968	4.33335e+06	761902	Palisade North	Horse Mountain	EF	Green River	9459	2883	8661	2640	798	243	2663	812	289	272	17	12	16	4	0.3	3.34	1613	9.65	Single			DR	67850	0.0679	505518	5.7037	0.000506	0.50552
174	39.1097	-107.973	4.33235e+06	762010	Palisade North	Horse Mountain	EF	Goodenough	9428	2874	9013	2747	415	126	2027	618	312	292	20	9	26	17	0.2	4.88	1641	10.72	Composite			DM	56502	0.0565	401609	5.6038	0.000402	0.40161
175	39.101	-107.97	4.33173e+06	762245	Palisade North	Horse Mountain	EF	Goodenough	9732	2966	9159	2792	573	175	4592	1400	330	310	20	1	26	25	0.12	8.01	1652	11.19	Complex			DM	254652	0.2547	2666048	6.4259	0.002666	2.66605
176	39.0953	-107.968	4.32354e+06	777183	Leon Peak South	Durkee Ridge	RS	Wasatch	9903	3018	9534	2906	369	112	2509	765	256	273	17	7	32	25	0.15	6.8	1749	11.03	Successive			DM	354476	0.3545	4040653	6.6065	0.004041	4.04065
177	39.017	-107.799	4.32299e+06	776413	Leon Peak South	Durkee Ridge	ES	Wasatch	9468	2886	9294	2833	174	53	1640	500	244	265	21	4	7	3	0.11	9.43	1724	9.43	Single			DM	79050	0.0791	612572	5.7872	0.000613	0.61257
178	39.0123	-107.808	4.32294e+06	779568	Leon Peak South	Durkee Ridge	EF	Wasatch	10502	3201	9931	3027	571	174	6022	1836	269	280	11	4	17	13	0.09	10.55	1840	10.87	Successive			DM	711167	0.7112	9696397	6.9866	0.009696	9.6964
179	39.0099	-107.774	4.32253e+06	777029	Leon Peak South	Durkee Ridge	ES	Wasatch	9682	2951	9377	2858	305	93	2440	744	271	278	7	5	15	10	0.12	8	1704	10.49	Single			DM	100913	0.1009	832671	5.9205	0.000833	0.83267
180	39.0079	-107.801	4.32279e+06	776697	Leon Peak South	Durkee Ridge	ES	Wasatch	9532	2905	9363	2854	169	52	2145	654	255	235	20	6	7	1	0.08	12.69	1727	9.3	Single			DM	79637	0.0796	618293	5.7912	0.000618	0.61829
181	39.01	-107.806	4.31863e+06	769299	Leon Peak South	Happy Hollow Gulch	DS	Wasatch	8229	2508	7932	2418	297	91	1141	348	188	180	8	15	21	6	0.26	3.84	1798	11.48	Single			DY	19827	0.0198	107650	5.032	0.000108	0.10765
182	38.9753	-107.891	4.31967e+06	759732	Flowing Park Southeast	Southeast Bench	EF	Green River	9629	2935	9370	2856	259	79	1588	484	221	185	36	7	11	4	0.16	6.13	1788	10.04	Single			DM	34219	0.0342	213794	5.33	0.000214	0.21379
183	38.9875	-108.001	4.31971e+06	759563	Flowing Park Southeast	Southeast Bench	ES	Green River	9585	2922	9453	2881	132	40	886	270	226	200	26	6	11	5	0.15	6.71	1787	9.79	Successive			DM	18094	0.0181	95960	4.9821	9.6e-05	0.09596
184	38.9881	-108.004	4.31968e+06	759951	Flowing Park Southeast	Southeast Bench	ES	Green River	9605	2928	9381	2859	224	68	1532	467	147	151	4	8	11	3	0.15	6.84	1809	11.25	Single			DM	43077	0.0431	285556	5.4557	0.000286	0.28556
185	38.9876	-107.999	4.30805e+06	746011	Flowing Park Southeast	Alkali Basin	RS-DS	Mesaverde	9544	2909	8919	2719	625	191	3441	1049	174	184	10	9	31	22	0.18	5.51	1839	11.65	Composite			DY	686255	0.6863	9271312	6.9671	0.009271	9.27131
186	38.8869	-108.164	4.31241e+06	741360	Flowing Park Northwest	Indian Point	RS-EF	Mesaverde	8538	2602	6670	2033	1868	569	12431	3790	310	291	19	4	30	26	0.15	6.65	1522	9.56	Complex			DM	1055244	1.0552	15924677	7.2021	0.015925	15.9247
187	38.9277	-108.218	4.31119e+06	742879	Flowing Park Northwest	Indian Point	RS-EF	Wasatch	9428	2874	8066	2459	1362	415	7485	2282	293	304	11	1	33	32	0.18	5.5	1777	11.8	Composite			DM	936003	0.936	13696231	7.1366	0.013696	13.6962
188	38.916	-108.199	4.30721e+06	758819	Flowing Park Southeast	Hells Kitchen	ES	Mancos	5972	1820	5637	1718	335	102	771	235	225	238	13	6	28	22	0.43	2.3	1571	9.8	Single			DY	20203	0.0202	110227	5.0423	0.00011	0.11023
189	38.8756	-108.017	4.3066e+06	759498	Flowing Park Southeast	Hells Kitchen	ES	Mancos	5670	1728	5547	1691	123	37	364	111	246	253	7	4	27	23	0.34	2.96	1586	10.58	Single			DY	4832	0.0048	18246	4.2612	1.8e-05	0.01825
190	38.8699	-108.009	4.30806e+06	759496	Flowing Park Southeast	Hells Kitchen	ES	Mancos	5935	1809	5814	1772	121	37	351	107	68	69	1	5	24	19	0.34	2.9	1622	10.56	Single			DY	4915	0.0049	18642	4.2705	1.9e-05	0.01864
191	38.8831	-108.008	4.31142e+06	763922	Flowing Park Southeast	Happy Hollow Gulch	EF	Mancos	6198	1889	5953	1814	245	75	604	184	251	247	4	12	37	25	0.41	2.46	1550	9.43	Multiple			DY	12884	0.0129	62616	4.7967	6.3e-05	0.06262
192	38.912	-107.956	4.31882e+06	755523	Flowing Park Southeast	Southeast Bench	EF	Green River	9793	2985	9148	2788	645	197	2699	823	156	141	15	10	17	7	0.24	4.19	1792	9.02	Complex			DR	36318	0.0363	230410	5.3625	0.00023	0.23041
193	38.9803	-108.05	4.31886e+06	757731	Flowing Park Southeast	Southeast Bench	EF	Green River	9601	2926	9224	2811	377	115	1774	541	133	150	17	4	27	23	0.21	4.71	1773	9.85	Single			DM	23046	0.023	130069	5.1142	0.00013	0.13007
194	38.9808	-108.025	4.32025e+06	760296	Flowing Park Southeast	Southeast Bench	EF	Green River	9597	2925	9292	2832	305	93	1210	369	103	102	1	5	8	3	0.25	3.97	1717	8.19	Single			DR	14439	0.0144	72258	4.8589	7.2e-05	0.07226
195	38.9926	-107.995	4.30935e+06	762771	Flowing Park Southeast	Happy Hollow Gulch	ES	Mancos	5941	1811	5703	1738	238	73	525	160	301	305	4	2	23	21	0.45	2.21	1456	10.66	Single			DY	13024	0.013	63472	4.8026	6.3e-05	0.06347
196	38.8938	-107.97	4.30907e+06	762730	Flowing Park Southeast	Happy Hollow Gulch	ES	Mancos	5923	1805	5661	1725	262	80	771	235	297	292	5	3	25	22	0.34	2.94	1496	11.13	Successive			DY	41748	0.0417	274517	5.4386	0.000275	0.27452
197	38.8913	-107.971	4.30877e+06	762707	Flowing Park Southeast	Happy Hollow Gulch	EF	Mancos	5903	1799	5591	1704	312	95	997	304	278	243	35	1	28	27	0.31	3.2	1524	7.19	Single			DY	14969	0.015	75605	4.8786	7.6e-05	0.07561
198	38.8886	-107.971	4.30558e+06	753792	Flowing Park Southeast	Hells Kitchen	EF	Mancos	6559	1999	5941	1811	618	188	2194	669	155	178	23	8	32	24	0.28	3.55	1657	6.65	Single			DM	110640	0.1106	934803	5.9707	0.000935	0.9348
199	38.8625	-108.075	4.33753e+06	777145	Leon Peak North	The Flat Tops	EF	Green River	9975	3040	9496	2894	479	146	2985	910	300	283	17	3	12	9	0.16	6.23	1694	11.12	Complex			DY	131651	0.1317	1163193	6.0657	0.001163	1.16319
200	39.1435	-107.792	4.33619e+06	778289	Leon Peak North	The Flat Tops	EF	Green River	10085	3074	9668	2947	417	127	4021	1226	229	243	14	1	17	16	0.1	9.64	1705	11.69	Composite			DY	251999	0.252	2631178	6.4202	0.002631	2.63118
201	39.1304	-107.781	4.33495e+06	778535	Leon Peak North	The Flat Tops	EF	Green River	10101	3079	9824	2994	277	84	1735	529	283	247	36	7	18	11	0.16	6.26	1773	11.33	Single			DM	31804	0.0318	194999	5.29	0.000195	0.195
202	39.1192	-107.778	4.33511e+06	778358	Leon Peak North	The Flat Tops	EF	Green River	10087	3075	9743	2970	344	105	1715	523	280	286	6	4	14	10	0.2	4.99	1686	11.06	Single			DM	44910	0.0449	300911	5.4784	0.000301	0.30091
203	39.1207	-107.78	4.33286e+06	779116	Leon Peak North	The Flat Tops	ES	Goodenough	10242	3122	9842	3000	400	122	1948	594	245	279	34	7	28	21	0.21	4.87	1810	11	Composite			DM	151981	0.152	1393342	6.1441	0.001393	1.39334
204	39.1002	-107.772	4.3332e+06	778964	Leon Peak North	The Flat Tops	ES	Goodenough	10216	3114	9842	3000	374	114	1233	376	246	272	26	5	31	26	0.3	3.3	1745	10.57	Single			DM	39423	0.0394	255437	5.4073	0.000255	0.25544
205	39.1033	-107.774	4.33348e+06	779039	Leon Peak North	The Flat Tops	ES	Goodenough	10255	3126	9882	3012	373	114	2093	638	317	339	22	3	35	32	0.18	5.61	1713	11.47	Complex			DM	113704	0.1137	967461	5.9856	0.000967	0.96746
206	39.1059	-107.772	4.33495e+06	776358	Leon Peak North	The Flat Tops	EF	Goodenough	10035	3059	9545	2909	490	149	2535	773	118	89	29	2	22	20	0.19	5.17	1716	11.47	Single			DM	91684	0.0917	738082	5.8681	0.000738	0.73808
207	39.1201	-107.802	4.33552e+06	776210	Leon Peak North	The Flat Tops	ES	Goodenough	10062	3067	9553	2912	509	155	2575	785	26	51	25	3	22	19	0.2	5.06	1699	10.9	Single			DM	114616	0.1146	977226	5.99	0.000977	0.97723
208	39.1251	-107.805	4.33631e+06	775942	Leon Peak North	The Flat Tops	EF	Goodenough	9930	3027	9477	2889	453	138	2007	612	32	34	2	5	31	26	0.23	4.43	1714	11.51	Single			DM	38331	0.0383	246576	5.392	0.000247	0.24658
209	39.1322	-107.808	4.33714e+06	775844	Leon Peak North	The Flat Tops	EF	Goodenough	9812	2991	9407	2867	405	123	2230	680	91	81	10	8	16	8	0.18	5.51	1758	12.73	Successive			DY	35431	0.0354	223358	5.349	0.000223	0.22336
210	39.1395	-107.809	4.33662e+06	775936	Leon Peak North	The Flat Tops	EF	Goodenough	9935	3028	9253	2820	682	208	3847	1173	25	32	7	3	34	31	0.18	5.64	1720	12.18	Single			DM	113649	0.1136	966874	5.9854	0.000967	0.96687
211	39.1348	-107.808	4.33886e+06	777755	Leon Peak North	The Flat Tops	EF	Green River	10036	3059	9248	2819	788	240	4359	1329	302	291	11	2	14	12	0.18	5.53	1734	11.19	Successive			DM	79809	0.0798	619966	5.7924	0.00062	0.61997
212	39.1559	-107.788	4.34118e+06	779050	Leon Peak North	The Flat Tops	EF	Green River	10274	3132	9572	2918	702	214	6042	1842	305	335	30	2	13	11	0.12	8.61	1746	10	Composite			DM	462721	0.4627	5648735	6.752	0.005649	5.64874
213	39.1739	-107.769	4.33978e+06	778278	Leon Peak North	The Flat Tops	EF	Green River	10119	3084	9514	2900	605	184	4969	1515	298	322	24	1	7	6	0.12	8.21	1747	11.29	Composite			DM	373752	0.3738	4318799	6.6354	0.004319	4.3188
214	39.1627	-107.779	4.3393e+06	777747	Leon Peak North	The Flat Tops	EF	Green River	10056	3065	9318	2840	738	225	3172	967	294	300	6	2	13	11	0.23	4.3	1727	10.5	Successive			DM	220414	0.2204	2223473	6.347	0.002223	2.22347
215	39.1586	-107.786	4.32518e+06	777449	Leon Peak South	Durkee Ridge	EF	Wasatch	10070	3069	9673	2948	397	121	3952	1205	260	292	32	9	27	18	0.1	9.96	1753	8.8	Multiple			DM	272540	0.2725	2903585	6.4629	0.002904	2.90359
216	39.0322	-107.795	4.32611e+06	777451	Leon Peak South	Durkee Ridge	DS	Green River	10359	3157	10054	3064	305	93	1515	462	90	119	29	9	21	12	0.2	4.97	1706	12.33	Successive			DM	37012	0.037	235957	5.3728	0.000236	0.23596
217	39.04	-107.794	4.3296e+06	771970	Leon Peak South	The Flat Tops	DS	Goodenough	10563	3220	10364	3159	199	61	1296	395	220	206	14	7	25	18	0.15	6.51	1940	10.81	Single			DM	28690	0.0287	171305	5.2338	0.000171	0.17131
218	39.0732	-107.856	4.32935e+06	772812	Leon Peak South	The Flat Tops	ES	Goodenough	10583	3226	10480	3194	103	31	554	169	141	147	6	5	13	8	0.19	5.38	1837	12.64	Single			DM	9497	0.0095	42673	4.6302	4.3e-05	0.04267
219	39.0706	-107.847	4.32105e+06	777544	Leon Peak South	Durkee Ridge	ES	Wasatch	9564	2915	9202	2805	362	110	3024	922	282	296	14	4	14	10	0.12	8.35	1710	8.58	Single			DR	116080	0.1161	992940	5.9969	0.000993	0.99294
220	38.9944	-107.795	4.3261e+06	776867	Leon Peak South	Durkee Ridge	DS	Goodenough	10314	3144	9873	3009	441	134	1453	443	251	244	7	13	19	6	0.3	3.29	1807	8.61	Successive			DM	31182	0.0312	190215	5.2792	0.00019	0.19022
221	39.0399	-107.802	4.32595e+06	775764	Leon Peak South	Durkee Ridge	RS	Basalt	10290	3136	9830	2996	460	140	1774	541	148	126	22	2	22	20	0.26	3.86	1813	9.93	Complex			DM	88138	0.0881	702373	5.8466	0.000702	0.70237
222	39.0391	-107.814	4.32661e+06	775808	Leon Peak South	Durkee Ridge	DS	Goodenough	10128	3087	10050	3063	78	24	397	121	116	112	4	13	18	5	0.2	5.09	1765	12.2	Single			DM	3914	0.0039	14002	4.1462	1.4e-05	0.014
223	39.045	-107.813	4.33127e+06	778373	Leon Peak North	The Flat Tops	ES	Goodenough	10465	3190	9906	3019	559	170	2132	650	66	60	6	5	32	27	0.26	3.81	1821	11.57	Single			DM	222480	0.2225	2249704	6.3521	0.00225	2.2497
224	39.0861	-107.782	4.33151e+06	777870	Leon Peak North	The Flat Tops	ES	Goodenough	10309	3142	10026	3056	283	86	1269	387	36	51	15	5	34	29	0.22	4.49	1711	11.92	Single			DM	72080	0.0721	545449	5.7368	0.000545	0.54545
225	39.0884	-107.787	4.33238e+06	777224	Leon Peak North	The Flat Tops	EF	Goodenough	10040	3060	9805	2989	235	72	2276	694	129	141	12	15	22	7	0.1	9.69	1822	7.66	Single			DM	52384	0.0524	365162	5.5625	0.000365	0.36516
226	39.0965	-107.794	4.33231e+06	776890	Leon Peak North	The Flat Tops	ES	Goodenough	10081	3073	9928	3026	153	47	813	248	167	159	8	4	22	18	0.19	5.32	1869	10.5	Single			DM	43584	0.0436	289786	5.4621	0.00029	0.28979
227	39.096	-107.798	4.33221e+06	776720	Leon Peak North	The Flat Tops	ES	Goodenough	10101	3079	9943	3031	158	48	669	204	145	160	15	6	30	24	0.24	4.23	1883	13.1	Single			DM	9417	0.0094	42219	4.6255	4.2e-05	0.04222
228	39.0951	-107.8	4.33267e+06	777189	Leon Peak North	The Flat Tops	ES	Goodenough	10123	3085	9912	3021	211	64	810	247	161	144	17	9	20	11	0.26	3.84	1877	11.72	Single			DM	42695	0.0427	282371	5.4508	0.000282	0.28237
229	39.0991	-107.795	4.32252e+06	779628	Leon Peak South	The Flat Tops	EF	Green River	10507	3203	10045	3062	462	141	2152	656	82	63	19	7	17	10	0.21	4.66	1857	9.25	Single			DM	38861	0.0389	250869	5.3994	0.000251	0.25087
230	39.0058	-107.772	4.32952e+06	737878	Palisade North	The Blowout	RS-EF	Green River	9224	2811	6706	2044	2518	767	17932	5467	309	305	4	6	32	26	0.14	7.12	1343	12	Composite	Qefr	1232±76	DY	2529546	2.5296	47798774	7.6794	0.047799	47.7988	Palisade Slide, also called Thunderbird Landslide or Thunderbird Landslide Complex
231	39.0843	-108.25	4.32861e+06	737946	Palisade North	The Blowout	RS-EF	Goodenough	9015	2748	8039	2450	976	297	5507	1679	319	328	9	8	27	19	0.18	5.64	1217	11.8	Single	Qefi		DM	396925	0.3969	4658084	6.6682	0.004658	4.65808
232	39.0742	-108.249	4.33168e+06	739480	Palisade North	The Blowout	EF	Green River	8918	2718	8079	2462	839	256	4339	1323	13	22	9	11	20	9	0.19	5.17	1461	11.61	Single	Qefr		DY	179963	0.18	1723164	6.2363	0.001723	1.72316
233	39.1	-108.23	4.33305e+06	740779	Palisade North	West Bench	EF	Green River	8089	2466	7105	2166	984	300	12205	3721	10	6	4	6	18	12	0.08	12.4	1461	9.33	Composite	Qefi		DM	1253743	1.2537	19777851	7.2962	0.019778	19.7779
234	39.1134	-108.215	4.33269e+06	741891	Palisade North	West Bench	EF	Green River	8123	2476	7070	2155	1053	321	12753	3888	54	40	14	3	16	13	0.08	12.11	1535	10.14	Composite	Qefi		DM	1790579	1.7906	30958141	7.4908	0.030958	30.9581
235	39.1098	-108.202	4.33092e+06	741140	Palisade North	West Bench	RS	Goodenough	9101	2774	8866	2702	235	72	584	178	21	26	5	24	35	11	0.4	2.48	1181	9.62	Single	Qefr		DY	4129	0.0041	14975	4.1754	1.5e-05	0.01498
236	39.0941	-108.212	4.33004e+06	741975	Palisade North	West Bench	RS	Goodenough	9660	2944	8921	2719	739	225	2381	726	59	50	9	5	18	13	0.31	3.22	1479	10.23	Complex	Qefr		DY	60417	0.0604	436903	5.6404	0.000437	0.4369
237	39.0862	-108.202	4.33014e+06	741736	Palisade North	West Bench	RS-EF	Goodenough	9625	2934	8271	2521	1354	413	4418	1347	45	47	2	2	22	20	0.31	3.26	1637	10.75	Complex	Qefr		DY	109963	0.11	927614	5.9674	0.000928	0.92761
238	39.0883	-108.203	4.3297e+06	742383	Palisade North	West Bench	RS	Green River	9508	2898	9012	2747	496	151	1561	476	71	80	9	18	21	3	0.32	3.15	1438	10.2	Single	Qefr		DY	17338	0.0173	90946	4.9588	9.1e-05	0.09095
239	39.0828	-108.198	4.33001e+06	742479	Palisade North	West Bench	RS	Green River	9221	2811	8883	2708	338	103	1371	418	22	30	8	19	23	4	0.25	4.06	1429	12.04	Single	Qefr		DY	34701	0.0347	217588	5.3376	0.000218	0.21759
240	39.0856	-108.197	4.33718e+06	741518	Palisade North	Windger Flats	EF	Green River	7611	2320	6251	1905	1360	415	16233	4949	357	349	8	2	17	15	0.08	11.94	1398	7.93	Single			DM	1386924	1.3869	22454336	7.3513	0.022454	22.4543
241	39.1504	-108.205	4.3352e+06	742413	Palisade North	Windger Flats	ES	Wasatch	7668	2337	6843	2086	825	251	8298	2530	109	89	20	8	17	9	0.1	10.06	1650	8.24	Composite			DM	2890025	2.89	56514116	7.7522	0.056514	56.5141	Chalk Mountain Slide
242	39.1323	-108.196	4.34209e+06	742868	Palisade North	Windger Flats	RS	Mesaverde	5413	1650	5052	1540	361	110	876	267	25	36	11	25	37	12	0.41	2.43	1089	10.98	Single			DY	23199	0.0232	131156	5.1178	0.000131	0.13116
243	39.1941	-108.188	4.34201e+06	743435	Palisade North	Windger Flats	RS	Mesaverde	5336	1626	5058	1542	278	85	918	280	1	5	4	22	52	30	0.3	3.3	749	13.04	Single			DY	23126	0.0231	130637	5.1161	0.000131	0.13064
244	39.1933	-108.181	4.34194e+06	743829	Palisade North	Windger Flats	DS	Mesaverde	5391	1643	5283	1610	108	33	367	112	36	28	8	19	31	12	0.29	3.4	1216	13.6	Single			DY	3464	0.0035	12007	4.0794	1.2e-05	0.01201
245	39.1925	-108.177	4.34206e+06	743564	Palisade North	Windger Flats	RS	Mesaverde	5234	1595	5082	1549	152	46	492	150	358	356	2	32	37	5	0.31	3.24	926	13.6	Single			DY	7583	0.0076	32157	4.5073	3.2e-05	0.03216
246	39.1937	-108.18	4.34251e+06	742002	Palisade North	Windger Flats	RS	Mesaverde	5254	1601	5026	1532	228	69	544	166	8	12	4	26	37	11	0.42	2.39	992	12.63	Single			DY	17608	0.0176	92732	4.9672	9.3e-05	0.09273
247	39.198	-108.198	4.3427e+06	756120	Palisade North	Mormon Mesa	EF	Wasatch	6421	1957	5763	1757	658	201	2722	830	332	316	16	9	28	19	0.24	4.14	1406	13.36	Composite			DY	88631	0.0886	707324	5.8496	0.000707	0.70732
248	39.1963	-108.036	4.34374e+06	756155	Palisade North	Mormon Mesa	EF	Wasatch	6143	1872	5978	1822	165	50	781	238	347	340	7	11	25	14	0.21	4.73	1344	12.23	Complex			DY	6032	0.006	24115	4.3823	2.4e-05	0.02412
249	39.2052	-108.033	4.34289e+06	755937	Palisade North	Mormon Mesa	EF	Wasatch	6409	1953	5707	1739	702	214	3195	974	290	297	7	8	28	20	0.22	4.55	1481	12.58	Composite			DY	30906	0.0309	188105	5.2744	0.000188	0.18811
250	39.1978	-108.036	4.34306e+06	755941	Palisade North	Mormon Mesa	ES	Wasatch	6268	1910	5870	1789	398	121	1076	328	323	326	3	10	33	23	0.37	2.7	1350	10.44	Single			DY	21301	0.0213	117810	5.0712	0.000118	0.11781
251	39.1992	-108.036	4.34319e+06	756054	Palisade North	Mormon Mesa	EF	Wasatch	6411	1954	5697	1736	714	218	3086	941	296	287	9	8	33	25	0.23	4.32	1452	12.27	Composite			DY	113257	0.1133	962676	5.9835	0.000963	0.96268
252	39.2003	-108.035	4.34272e+06	771209	Leon Peak North	Vega	ES	Green River	7928	2416	7752	2363	176	54	499	152	300	305	5	18	27	9	0.35	2.83	1380	11.3	Single			DY	4893	0.0049	18539	4.2681	1.9e-05	0.01854
253	39.1914	-107.86	4.34282e+06	771078	Leon Peak North	Vega	ES	Green River	7707	2349	7597	2316	110	34	469	143	279	282	3	21	26	5	0.23	4.26	1446	13.27	Single			DY	4408	0.0044	16255	4.211	1.6e-05	0.01626
254	39.1924	-107.861	4.34288e+06	771132	Leon Peak North	Vega	ES	Green River	7817	2383	7600	2316	217	66	672	205	286	288	2	6	10	4	0.32	3.1	1556	10.75	Single			DY	4978	0.005	18942	4.2774	1.9e-05	0.01894
255	39.1929	-107.861	4.34296e+06	771084	Leon Peak North	Vega	ES	Green River	7693	2345	7571	2308	122	37	420	128	277	271	6	23	27	4	0.29	3.44	1494	13.02	Single			DY	3735	0.0037	13202	4.1206	1.3e-05	0.0132
256	39.1936	-107.861	4.32328e+06	789716	Leon Peak South	Duke Basin	EF	Green River	10758	3279	10471	3192	287	87	1456	444	185	203	18	3	13	10	0.2	5.07	1881	11.54	Composite			DY	55427	0.0554	392026	5.5933	0.000392	0.39203
257	39.0099	-107.655	4.32322e+06	790219	Leon Peak South	Duke Basin	ES	Green River	10671	3253	10438	3182	233	71	1456	444	141	145	4	2	27	25	0.16	6.25	1836	11.55	Successive			DY	85514	0.0855	676188	5.8301	0.000676	0.67619
258	39.0099	-107.648	4.32306e+06	789940	Leon Peak South	Duke Basin	ES	Green River	10645	3245	10436	3181	209	64	1397	426	186	175	11	12	20	8	0.15	6.69	1906	9.34	Successive			DM	50726	0.0507	350696	5.5449	0.000351	0.3507
259	39.0085	-107.652	4.32332e+06	789495	Leon Peak South	Duke Basin	EF	Green River	10689	3258	10427	3178	262	80	1558	475	244	232	12	2	12	10	0.17	5.95	1805	9.52	Successive			DM	32047	0.032	196875	5.2942	0.000197	0.19688
260	39.0099	-107.657	4.32282e+06	739317	Palisade South	Whitewater Basin	RS-DS	Green River	9308	2837	8171	2491	1137	347	4238	1292	302	301	1	5	48	43	0.27	3.73	1798	12.5	Composite			DM	386276	0.3863	4501516	6.6534	0.004502	4.50152
261	39.0217	-108.236	4.32319e+06	738894	Palisade South	Whitewater Basin	DS	Wasatch	8448	2575	8214	2504	234	71	600	183	273	281	8	10	28	18	0.39	2.57	1636	12.43	Single			DY	7057	0.0071	29374	4.468	2.9e-05	0.02937
262	39.0251	-108.24	4.32304e+06	739872	Palisade South	Whitewater Basin	RS-DS	Green River	9488	2892	8478	2584	1010	308	3287	1002	265	283	18	21	35	14	0.31	3.25	1625	11.9	Successive			DM	108570	0.1086	912864	5.9604	0.000913	0.91286
263	39.0234	-108.232	4.32289e+06	738654	Palisade South	Whitewater Basin	DS	Wasatch	8374	2552	8179	2493	195	59	692	211	21	9	12	5	36	31	0.28	3.55	1408	14.27	Single			DY	17826	0.0178	94177	4.9739	9.4e-05	0.09418
264	39.0225	-108.243	4.3234e+06	739523	Palisade South	Whitewater Basin	DS	Green River	9138	2785	8393	2558	745	227	2804	855	289	287	2	4	28	24	0.27	3.76	1759	12.41	Complex			DY	111904	0.1119	948242	5.9769	0.000948	0.94824
265	39.0267	-108.234	4.32342e+06	738702	Palisade South	Whitewater Basin	DS	Green River	8668	2642	7929	2417	739	225	5333	1626	275	276	1	5	25	20	0.14	7.22	1668	11.8	Successive			DY	271156	0.2712	2885058	6.4602	0.002885	2.88506
266	39.0276	-108.238	4.32361e+06	739049	Palisade South	Whitewater Basin	DS	Green River	8816	2687	8263	2519	553	169	2421	738	266	272	6	12	21	9	0.23	4.38	1716	11.24	Multiple			DM	74576	0.0746	569305	5.7553	0.000569	0.56931
267	39.0289	-108.238	4.32372e+06	738840	Palisade South	Whitewater Basin	DS	Green River	8479	2584	8220	2505	259	79	1050	320	338	340	2	17	21	4	0.25	4.05	1409	11.46	Single			DM	13402	0.0134	65794	4.8182	6.6e-05	0.06579
268	39.0299	-108.241	4.3243e+06	739269	Palisade South	Whitewater Basin	DS	Green River	9044	2757	8649	2636	395	120	1515	462	211	218	7	5	27	22	0.26	3.84	1801	11.78	Single			DM	73062	0.0731	554813	5.7441	0.000555	0.55481
269	39.035	-108.236	4.32431e+06	739503	Palisade South	Whitewater Basin	DS	Green River	9010	2746	8654	2638	356	109	1922	586	215	236	21	19	34	15	0.19	5.4	1805	11.69	Single			DM	41922	0.0419	275956	5.4408	0.000276	0.27596
270	39.0345	-108.234	4.32393e+06	738660	Palisade South	Whitewater Basin	DS	Wasatch	8555	2608	8082	2463	473	144	1781	543	235	235	0	15	20	5	0.27	3.77	1768	10.32	Single			DM	54750	0.0547	386016	5.5866	0.000386	0.38602
271	39.0319	-108.243	4.32401e+06	738890	Palisade South	Whitewater Basin	DS	Wasatch	8807	2684	8217	2505	590	180	2447	746	210	228	18	8	13	5	0.24	4.15	1770	10.39	Single			DM	64513	0.0645	474461	5.6762	0.000474	0.47446
272	39.0325	-108.24	4.32444e+06	738683	Palisade South	Whitewater Basin	DS	Green River	9213	2808	8233	2509	980	299	3359	1024	204	196	8	30	45	15	0.29	3.43	1811	12.38	Complex			DY	193104	0.1931	1882820	6.2748	0.001883	1.88282	Whitewater Basin Slide
273	39.0364	-108.242	4.32465e+06	738493	Palisade South	Whitewater Basin	DS	Green River	9220	2810	8311	2533	909	277	3106	947	225	245	20	18	35	17	0.29	3.42	1742	10.18	Multiple			DM	112148	0.1121	950842	5.9781	0.000951	0.95084
274	39.0384	-108.245	4.32478e+06	737927	Palisade South	Whitewater Basin	DS	Green River	9254	2821	8297	2529	957	292	3979	1213	164	159	5	32	54	22	0.24	4.16	1839	12.59	Composite			DY	584005	0.584	7569209	6.8791	0.007569	7.56921
275	39.0397	-108.251	4.32536e+06	737031	Palisade South	The Blowout	RS	Green River	8881	2707	8348	2544	533	162	3552	1083	247	260	13	11	23	12	0.15	6.66	1708	11.96	Composite			DM	113348	0.1133	963658	5.9839	0.000964	0.96366
276	39.045	-108.263	4.32618e+06	736379	Palisade South	The Blowout	DS	Wasatch	8720	2658	8407	2562	313	95	2526	770	288	292	4	11	10	-1	0.12	8.07	1645	11.37	Multiple			DY	57529	0.0575	410808	5.6136	0.000411	0.41081
277	39.0528	-108.268	4.3262e+06	736932	Palisade South	The Blowout	DS	Green River	9082	2768	8733	2662	349	106	1984	605	262	271	9	15	30	15	0.18	5.69	1656	13.17	Composite			DM	38508	0.0385	248005	5.3945	0.000248	0.24801
278	39.0527	-108.262	4.32585e+06	736394	Palisade South	The Blowout	EF	Wasatch	8736	2663	8190	2496	546	166	2522	769	282	266	16	2	14	12	0.22	4.62	1640	10.18	Complex			DM	25931	0.0259	150854	5.1786	0.000151	0.15085	Tower Slide
279	39.0497	-108.268	4.32666e+06	736657	Palisade South	The Blowout	RS	Green River	8895	2711	8740	2664	155	47	938	286	309	314	5	7	16	9	0.17	6.05	1514	11.89	Single			DM	15461	0.0155	78746	4.8962	7.9e-05	0.07875
280	39.0569	-108.265	4.32635e+06	736667	Palisade North	The Blowout	RS	Green River	9052	2759	8541	2603	511	156	3359	1024	274	265	9	4	23	19	0.15	6.57	1650	12.06	Composite			DM	91112	0.0911	732304	5.8647	0.000732	0.7323
281	39.0542	-108.265	4.32373e+06	738355	Palisade South	Whitewater Basin	EF	Wasatch	8306	2532	7843	2391	463	141	1807	551	210	196	14	12	23	11	0.26	3.9	1795	9.89	Single			DR	24759	0.0248	142332	5.1533	0.000142	0.14233
282	39.0305	-108.246	4.32392e+06	737534	Palisade South	Whitewater Basin	DS	Wasatch	8768	2672	7362	2244	1406	429	4015	1224	133	160	27	10	24	14	0.35	2.86	1797	10.34	Composite			DY	296581	0.2966	3229166	6.5091	0.003229	3.22917
283	39.0321	-108.256	4.32396e+06	737895	Palisade South	Whitewater Basin	DS	Wasatch	8355	2547	7927	2416	428	130	2024	617	205	284	79	1	5	4	0.21	4.73	1655	11.33	Single			DY	148150	0.1482	1349328	6.1301	0.001349	1.34933
284	39.0323	-108.252	4.3244e+06	737095	Palisade South	Whitewater Basin	EF	Wasatch	8766	2672	8191	2497	575	175	3267	996	216	207	9	11	23	12	0.18	5.68	1783	9.36	Single			DM	82419	0.0824	645562	5.8099	0.000646	0.64556
285	39.0365	-108.261	4.32234e+06	740530	Palisade South	Coal Creek Basin	RS	Green River	9410	2868	8741	2664	669	204	3477	1060	215	220	5	7	33	26	0.19	5.2	1718	11.28	Multiple			DM	335875	0.3359	3775918	6.577	0.003776	3.77592
286	39.017	-108.222	4.32186e+06	740461	Palisade South	Coal Creek Basin	RS	Green River	9391	2862	8383	2555	1008	307	4841	1476	251	273	22	10	28	18	0.21	4.8	1797	11.52	Multiple			DM	310702	0.3107	3423629	6.5345	0.003424	3.42363
287	39.0127	-108.223	4.32151e+06	740493	Palisade South	Coal Creek Basin	RS	Green River	9426	2873	8288	2526	1138	347	5369	1637	252	280	28	6	26	20	0.21	4.72	1684	11.84	Complex			DM	337422	0.3374	3797791	6.5795	0.003798	3.79779
288	39.0093	-108.222	4.32096e+06	740903	Palisade South	Coal Creek Basin	RS	Green River	9378	2858	8471	2582	907	276	4405	1343	276	274	2	27	33	6	0.21	4.86	1516	12.95	Composite			DY	281543	0.2815	3024674	6.4807	0.003025	3.02467
289	39.0045	-108.218	4.32123e+06	740800	Palisade South	Coal Creek Basin	RS	Wasatch	9157	2791	8632	2631	525	160	2142	653	266	286	20	5	22	17	0.25	4.08	1713	11.09	Successive			DY	111951	0.112	948748	5.9772	0.000949	0.94875
290	39.0069	-108.219	4.32127e+06	741242	Palisade South	Coal Creek Basin	RS	Green River	9359	2853	8996	2742	363	111	1886	575	251	239	12	19	35	16	0.19	5.2	1748	13.16	Successive			DM	89763	0.0898	718701	5.8565	0.000719	0.7187
291	39.0072	-108.214	4.31924e+06	741163	Palisade South	Kannah Creek Basin	EF	Wasatch	8936	2724	8209	2502	727	222	2929	893	201	191	10	9	20	11	0.25	4.03	1811	9.93	Single			DR	62673	0.0627	457508	5.6604	0.000458	0.45751
292	38.9902	-108.215	4.32028e+06	742168	Palisade South	Kannah Creek Basin	EF	Wasatch	9122	2780	8563	2610	559	170	2611	796	176	150	26	3	23	20	0.21	4.67	1799	12.41	Complex			DY	55991	0.056	397048	5.5988	0.000397	0.39705
293	38.9975	-108.203	4.31955e+06	742412	Palisade South	Kannah Creek Basin	EF	Wasatch	8813	2686	8091	2466	722	220	2358	719	115	140	25	7	36	29	0.31	3.27	1727	11.42	Composite			DY	49205	0.0492	337529	5.5283	0.000338	0.33753
294	38.9928	-108.201	4.32004e+06	742723	Palisade South	Kannah Creek Basin	DS	Green River	9016	2748	8394	2558	622	190	3014	919	181	192	11	12	20	8	0.21	4.85	1831	12.5	Composite			DY	91642	0.0916	737663	5.8679	0.000738	0.73766
295	38.9968	-108.198	4.31973e+06	742613	Palisade South	Kannah Creek Basin	DS	Green River	8628	2630	8224	2507	404	123	1299	396	202	194	8	14	30	16	0.31	3.22	1825	10.51	Successive			DY	31961	0.032	196210	5.2927	0.000196	0.19621
296	38.993	-108.199	4.31932e+06	742682	Palisade South	Kannah Creek Basin	ES	Green River	8574	2613	7593	2314	981	299	4438	1353	228	239	11	4	31	27	0.22	4.52	1821	11.24	Composite			DM	221457	0.2215	2236704	6.3496	0.002237	2.2367
297	38.9892	-108.198	4.32061e+06	742305	Palisade South	Kannah Creek Basin	DS	Green River	9089	2770	8953	2729	136	41	581	177	207	188	19	6	24	18	0.23	4.27	1780	14.2	Successive			DY	11869	0.0119	56475	4.7519	5.6e-05	0.05648
298	39.001	-108.202	4.32047e+06	742284	Palisade South	Kannah Creek Basin	EF	Wasatch	9064	2763	8319	2536	745	227	3224	983	176	166	10	12	17	5	0.23	4.33	1790	12.74	Complex			DM	95030	0.095	772113	5.8877	0.000772	0.77211
299	38.997	-108.201	4.32038e+06	743015	Palisade South	Kannah Creek Basin	RS	Green River	9133	2784	8708	2654	425	130	1738	530	251	220	31	5	40	35	0.24	4.09	1784	14.49	Complex			DY	38825	0.0388	250576	5.3989	0.000251	0.25058
300	38.9987	-108.194	4.32036e+06	743566	Palisade South	Kannah Creek Basin	DS	Green River	9356	2852	9017	2748	339	103	741	226	223	233	10	29	39	10	0.46	2.19	1715	13.61	Single			DY	14846	0.0148	74824	4.874	7.5e-05	0.07482
301	38.9983	-108.188	4.32013e+06	743219	Palisade South	Kannah Creek Basin	DS	Green River	9127	2782	8561	2609	566	173	2280	695	220	201	19	9	39	30	0.25	4.03	1840	13.83	Complex			DY	179690	0.1797	1719884	6.2355	0.00172	1.71988
302	38.9964	-108.192	4.32007e+06	743539	Palisade South	Kannah Creek Basin	DS	Wasatch	9131	2783	8896	2712	235	72	991	302	253	265	12	13	23	10	0.24	4.22	1748	13.88	Single			DY	21300	0.0213	117801	5.0711	0.000118	0.1178
303	38.9958	-108.188	4.31927e+06	747510	Palisade South	Kannah Creek Basin	EF	Green River	9756	2974	8161	2487	1595	486	9847	3002	203	210	7	16	35	19	0.16	6.17	1860	12.18	Composite			DM	568311	0.5683	7314367	6.8642	0.007314	7.31437
304	38.9875	-108.142	4.31932e+06	748187	Palisade South	Kannah Creek Basin	EF	Green River	9770	2978	8566	2611	1204	367	6075	1852	192	193	1	3	19	16	0.2	5.05	1781	12.04	Composite			DY	130088	0.1301	1145855	6.0591	0.001146	1.14586
305	38.9877	-108.135	4.31948e+06	748473	Palisade South	Kannah Creek Basin	RS	Wasatch	9568	2916	9155	2790	413	126	1666	508	256	256	0	7	18	11	0.25	4.03	1769	10.92	Single			DM	14727	0.0147	74076	4.8697	7.4e-05	0.07408
306	38.989	-108.131	4.31994e+06	744578	Palisade South	Kannah Creek Basin	RS	Green River	9652	2942	8625	2629	1027	313	8364	2550	229	214	15	17	37	20	0.12	8.14	1888	13.29	Composite			DY	340799	0.3408	3845639	6.585	0.003846	3.84564
307	38.9933	-108.174	4.31959e+06	745171	Palisade South	Kannah Creek Basin	EF	Wasatch	9127	2782	8491	2588	636	194	3756	1145	227	210	17	2	39	37	0.17	5.91	1866	13.44	Complex			DY	131994	0.132	1166999	6.0671	0.001167	1.167
308	38.991	-108.169	4.31956e+06	748633	Palisade South	Kannah Creek Basin	ES	Wasatch	9648	2941	9252	2820	396	121	1686	514	219	207	12	3	14	11	0.23	4.26	1810	10.14	Single			DM	29102	0.0291	174405	5.2416	0.000174	0.17441
309	38.9897	-108.129	4.31964e+06	749075	Palisade South	Kannah Creek Basin	RS	Green River	9820	2993	9172	2796	648	198	3854	1175	235	202	33	2	28	26	0.17	5.95	1832	12.25	Composite			DY	163929	0.1639	1532421	6.1854	0.001532	1.53242
310	38.9904	-108.124	4.31926e+06	749264	Flowing Park Northwest	Kannah Creek Basin	RS	Green River	9715	2961	9268	2825	447	136	1824	556	311	298	13	15	26	11	0.25	4.08	1563	11.3	Complex			DY	58335	0.0583	418059	5.6212	0.000418	0.41806
311	38.9868	-108.122	4.31822e+06	748123	Flowing Park Northwest	Kannah Creek Basin	DS	Wasatch	9161	2792	8584	2616	577	176	3759	1146	295	306	11	5	26	21	0.15	6.51	1587	11.35	Successive			DM	153096	0.1531	1406207	6.148	0.001406	1.40621
312	38.977	-108.135	4.31831e+06	748739	Flowing Park Northwest	Kannah Creek Basin	RS	Green River	9726	2964	8964	2732	762	232	2965	904	295	298	3	5	22	17	0.26	3.89	1726	10.66	Complex			DY	59980	0.06	432935	5.6364	0.000433	0.43294
313	38.9785	-108.129	4.31787e+06	748753	Flowing Park Northwest	Kannah Creek Basin	RS	Green River	9708	2959	9095	2772	613	187	3044	928	289	301	12	5	14	9	0.2	4.97	1637	10.85	Complex			DY	77039	0.077	593045	5.7731	0.000593	0.59305
314	38.9745	-108.129	4.31753e+06	748088	Flowing Park Northwest	Kannah Creek Basin	RS	Green River	9718	2962	8701	2652	1017	310	5373	1638	279	289	10	3	18	15	0.19	5.28	1748	11.91	Composite			DY	209266	0.2093	2083020	6.3187	0.002083	2.08302
315	38.9712	-108.134	4.31695e+06	747244	Flowing Park Northwest	Kannah Creek Basin	RS	Green River	9567	2916	7745	2361	1822	555	13645	4160	305	313	8	2	33	31	0.13	7.49	1757	12.43	Composite			DM	2763820	2.7638	53429067	7.7278	0.053429	53.4291	Kannah Creek Slide
316	38.9666	-108.146	4.316e+06	746301	Flowing Park Northwest	Kannah Creek Basin	RS	Green River	9697	2956	8178	2493	1519	463	11198	3414	351	321	30	3	25	22	0.14	7.37	1625	11.71	Composite			DY	944224	0.9442	13847635	7.1414	0.013848	13.8476
317	38.9555	-108.153	4.31554e+06	744123	Flowing Park Northwest	Kannah Creek Basin	EF	Mesaverde	8680	2646	7485	2281	1195	364	8148	2484	322	336	14	2	19	17	0.15	6.82	1575	12.46	Successive			DM	442714	0.4427	5343406	6.7278	0.005343	5.34341
318	38.9548	-108.183	4.30882e+06	743738	Flowing Park Northwest	Indian Point	RS	Mesaverde	9497	2895	8395	2559	1102	336	4185	1276	280	264	16	12	32	20	0.26	3.8	1770	11.58	Successive			DY	103640	0.1036	861060	5.935	0.000861	0.86106
319	38.8945	-108.19	4.31091e+06	741312	Flowing Park Northwest	Indian Point	EF	Mesaverde	7972	2430	7329	2234	643	196	5524	1684	277	301	24	6	21	15	0.12	8.59	1598	9.94	Single			DM	340211	0.3402	3837298	6.584	0.003837	3.8373
320	38.9139	-108.217	4.30915e+06	743961	Flowing Park Northwest	Indian Point	RS	Mesaverde	9435	2876	8835	2693	600	183	1581	482	243	234	9	9	34	25	0.38	2.63	1806	9.99	Single			DY	50067	0.0501	344973	5.5378	0.000345	0.34497
321	38.8974	-108.187	4.30792e+06	742691	Flowing Park Northwest	Indian Point	EF	Mesaverde	8584	2616	7160	2182	1424	434	7029	2143	233	254	21	9	18	9	0.2	4.94	1670	6.91	Complex			DR	305732	0.3057	3354916	6.5257	0.003355	3.35492
322	38.8875	-108.2	4.30815e+06	743426	Flowing Park Northwest	Indian Point	EF	Mesaverde	9006	2745	8170	2490	836	255	3254	992	247	278	31	13	25	12	0.26	3.89	1704	7.63	Single			DR	65346	0.0653	482178	5.6832	0.000482	0.48218
323	38.8889	-108.193	4.3083e+06	744541	Flowing Park Northwest	Alkali Basin	RS	Mesaverde	9663	2945	8580	2615	1083	330	3792	1156	225	218	7	11	36	25	0.29	3.5	1855	9.64	Complex			DM	269498	0.2695	2862898	6.4568	0.002863	2.8629
324	38.8896	-108.181	4.30812e+06	744963	Flowing Park Northwest	Alkali Basin	EF	Mesaverde	9530	2905	8927	2721	603	184	2880	878	226	207	19	8	15	7	0.21	4.78	1793	11.09	Multiple			DM	55764	0.0558	395026	5.5966	0.000395	0.39503
325	38.8878	-108.176	4.30758e+06	744647	Flowing Park Northwest	Alkali Basin	DS	Mesaverde	9136	2785	8446	2574	690	210	2644	806	195	170	25	18	26	8	0.26	3.83	1798	10.68	Single			DM	43210	0.0432	286657	5.4574	0.000287	0.28666
326	38.883	-108.18	4.30781e+06	744514	Flowing Park Northwest	Alkali Basin	DS	Mesaverde	8919	2719	8440	2573	479	146	2860	872	256	273	17	15	18	3	0.17	5.97	1698	8.77	Multiple			DM	130438	0.1304	1149734	6.0606	0.00115	1.14973
327	38.8848	-108.182	4.30736e+06	743855	Flowing Park Northwest	Alkali Basin	DS	Mesaverde	8507	2593	7586	2312	921	281	4490	1369	276	231	45	6	23	17	0.21	4.88	1750	7.34	Single			DR	312223	0.3122	3444713	6.5372	0.003445	3.44471
328	38.8813	-108.189	4.3068e+06	744172	Flowing Park Northwest	Alkali Basin	DS	Mesaverde	8846	2696	7274	2217	1572	479	6048	1844	268	281	13	8	30	22	0.26	3.85	1657	6.34	Complex			DR	279194	0.2792	2992985	6.4761	0.002993	2.99299
329	38.8762	-108.185	4.30406e+06	747702	Flowing Park Southeast	Alkali Basin	EF	Mancos	8206	2501	6421	1957	1785	544	14708	4484	212	180	32	18	28	10	0.12	8.24	1748	7.47	Successive			DM	2336597	2.3366	43260858	7.6361	0.043261	43.2609	Alkali Basin Slide
330	38.8523	-108.146	4.30783e+06	747303	Flowing Park Southeast	Alkali Basin	RS-EF	Wasatch	9756	2974	8350	2545	1406	429	8308	2533	167	157	10	4	30	26	0.17	5.91	1880	9.12	Composite			DM	700617	0.7006	9515901	6.9784	0.009516	9.5159
331	38.8845	-108.149	4.30794e+06	747608	Flowing Park Southeast	Alkali Basin	RS-DS	Mesaverde	9445	2879	8846	2696	599	183	2394	730	261	251	10	3	29	26	0.25	4	1750	9.96	Complex			DY	69077	0.0691	517039	5.7135	0.000517	0.51704
332	38.8854	-108.145	4.30809e+06	747476	Flowing Park Southeast	Alkali Basin	DS	Mesaverde	9518	2901	9107	2776	411	125	2001	610	255	245	10	3	33	30	0.21	4.87	1731	8.76	Single			DY	45480	0.0455	305717	5.4853	0.000306	0.30572
333	38.8872	-108.146	4.30827e+06	747437	Flowing Park Southeast	Alkali Basin	DS	Mesaverde	9555	2912	9171	2795	384	117	1309	399	247	234	13	13	23	10	0.29	3.41	1863	9.93	Single			DY	17775	0.0178	93837	4.9724	9.4e-05	0.09384
334	38.8885	-108.147	4.30862e+06	748913	Flowing Park Southeast	Southeast Bench	DS	Wasatch	9467	2886	8735	2662	732	223	4189	1277	97	88	9	2	13	11	0.17	5.72	1751	10.85	Complex			DR	173390	0.1734	1644423	6.216	0.001644	1.64442
335	38.8912	-108.13	4.30818e+06	748695	Flowing Park Southeast	Southeast Bench	DS	Wasatch	9355	2851	8845	2696	510	155	4149	1265	98	122	24	3	9	6	0.12	8.14	1710	11.38	Multiple			DM	164883	0.1649	1543634	6.1885	0.001544	1.54363
336	38.8873	-108.133	4.30838e+06	748918	Flowing Park Southeast	Southeast Bench	DS	Wasatch	9282	2829	9033	2753	249	76	1197	365	131	122	9	5	8	3	0.21	4.81	1704	11.69	Single			DM	24299	0.0243	139018	5.1431	0.000139	0.13902
337	38.889	-108.13	4.31038e+06	750294	Flowing Park Southeast	Southeast Bench	DS	Wasatch	9517	2901	9026	2751	491	150	4690	1430	137	114	23	2	5	3	0.1	9.55	1721	11.63	Composite			DM	284510	0.2845	3064812	6.4864	0.003065	3.06481
338	38.9062	-108.114	4.3095e+06	748319	Flowing Park Southeast	Southeast Bench	RS-DS	Green River	9799	2987	9432	2875	367	112	4615	1407	170	160	10	5	36	31	0.08	12.57	1883	12.29	Composite			DY	394345	0.3943	4620050	6.6646	0.00462	4.62005
339	38.8993	-108.137	4.30688e+06	749922	Flowing Park Southeast	Alkali Basin	DS	Mesaverde	8137	2480	7803	2378	334	102	1250	381	170	187	17	11	16	5	0.27	3.74	1764	11.9	Multiple			DM	14815	0.0148	74632	4.8729	7.5e-05	0.07463
340	38.8752	-108.119	4.30685e+06	750094	Flowing Park Southeast	Alkali Basin	DS	Mesaverde	8062	2457	7809	2380	253	77	836	255	86	136	50	15	22	7	0.3	3.31	1780	9.81	Successive			DM	9600	0.0096	43256	4.636	4.3e-05	0.04326
341	38.8749	-108.117	4.31203e+06	752845	Flowing Park Southeast	Southeast Bench	EF	Wasatch	9164	2793	8000	2438	1164	355	12740	3884	135	137	2	11	42	31	0.09	10.94	1674	10.08	Complex			DM	1303241	1.3032	20764450	7.3173	0.020764	20.7645
342	38.9207	-108.084	4.31038e+06	754559	Flowing Park Southeast	Hells Kitchen	RS	Mesaverde	7277	2218	6799	2072	478	146	1315	401	90	96	6	4	36	32	0.36	2.75	1706	10.81	Complex			DM	54778	0.0548	386266	5.5869	0.000386	0.38627
343	38.9054	-108.064	4.31438e+06	752391	Flowing Park Southeast	Southeast Bench	DS	Wasatch	9129	2783	8913	2717	216	66	2348	716	94	95	1	5	9	4	0.09	10.87	1672	9.18	Single			DM	65137	0.0651	480235	5.6815	0.00048	0.48024
344	38.9421	-108.088	4.31484e+06	751711	Flowing Park Southeast	Southeast Bench	RS	Goodenough	9843	3000	9200	2804	643	196	2555	779	147	143	4	5	17	12	0.25	3.97	1809	10.88	Complex			DM	61379	0.0614	445664	5.649	0.000446	0.44566
345	38.9463	-108.096	4.31475e+06	751500	Flowing Park Southeast	Southeast Bench	RS-DS	Goodenough	9907	3020	9110	2777	797	243	3943	1202	134	146	12	17	21	4	0.2	4.95	1819	11.32	Complex			DM	72004	0.072	544730	5.7362	0.000545	0.54473
346	38.9451	-108.096	4.31478e+06	752073	Flowing Park Southeast	Southeast Bench	RS	Goodenough	9956	3035	9086	2769	870	265	3959	1207	165	152	13	14	27	13	0.22	4.55	1871	10.55	Complex			DM	67062	0.0671	498143	5.6974	0.000498	0.49814
347	38.9467	-108.093	4.3153e+06	752039	Flowing Park Southeast	Southeast Bench	RS	Goodenough	9809	2990	9222	2811	587	179	2073	632	131	136	5	7	30	23	0.28	3.53	1808	11.2	Multiple			DM	27590	0.0276	163091	5.2124	0.000163	0.16309
348	38.9505	-108.092	4.31543e+06	752102	Flowing Park Southeast	Southeast Bench	RS	Green River	9561	2914	9180	2798	381	116	1542	470	131	133	2	6	35	29	0.25	4.05	1737	11.82	Single			DM	24913	0.0249	143452	5.1567	0.000143	0.14345
349	38.9516	-108.091	4.31551e+06	752153	Flowing Park Southeast	Southeast Bench	RS	Green River	9761	2975	9191	2801	570	174	2037	621	82	89	7	17	31	14	0.28	3.57	1781	11.4	Multiple			DM	23106	0.0231	130494	5.1156	0.00013	0.13049
350	38.9523	-108.09	4.31568e+06	752154	Flowing Park Southeast	Southeast Bench	RS	Goodenough	9790	2984	9292	2832	498	152	1292	394	123	112	11	22	25	3	0.39	2.6	1786	8.55	Single			DM	10682	0.0107	49468	4.6943	4.9e-05	0.04947
351	38.9541	-108.09	4.315e+06	753029	Flowing Park Southeast	Southeast Bench	RS-EF	Wasatch	9297	2834	8265	2519	1032	315	9978	3042	111	107	4	8	13	5	0.1	9.67	1690	10.61	Composite			DM	848230	0.8482	12101494	7.0828	0.012101	12.1015
352	38.9474	-108.08	4.31519e+06	755401	Flowing Park Southeast	Southeast Bench	DS	Wasatch	8200	2499	8002	2439	198	60	902	275	86	93	7	6	18	12	0.22	4.56	1464	12.28	Multiple			DY	29083	0.0291	174261	5.2412	0.000174	0.17426
353	38.9485	-108.053	4.31585e+06	753656	Flowing Park Southeast	Southeast Bench	DS	Wasatch	9289	2831	8564	2610	725	221	5563	1696	162	130	32	11	27	16	0.13	7.67	1790	11.07	Complex			DM	415577	0.4156	4934915	6.6933	0.004935	4.93492
354	38.955	-108.073	4.31648e+06	752630	Flowing Park Southeast	Southeast Bench	RS	Basalt	9962	3036	9284	2830	678	207	1883	574	111	102	9	5	50	45	0.36	2.78	1762	10.88	Multiple			DY	153499	0.1535	1410861	6.1495	0.001411	1.41086
355	38.9609	-108.084	4.31617e+06	754124	Flowing Park Southeast	Southeast Bench	RS-DS	Wasatch	9316	2840	8161	2487	1155	352	7957	2426	80	113	33	11	20	9	0.15	6.89	1765	11.76	Composite			DM	754718	0.7547	10448705	7.0191	0.010449	10.4487
356	38.9577	-108.067	4.31549e+06	754848	Flowing Park Southeast	Southeast Bench	DS	Wasatch	8414	2565	8151	2484	263	80	954	291	207	177	30	2	25	23	0.28	3.63	1691	12.1	Multiple			DY	48626	0.0486	332542	5.5218	0.000333	0.33254
357	38.9514	-108.059	4.31737e+06	753232	Flowing Park Southeast	Southeast Bench	EF	Goodenough	9925	3025	9735	2967	190	58	1184	361	156	159	3	3	13	10	0.16	6.23	1840	9.78	Single			DM	23461	0.0235	133016	5.1239	0.000133	0.13302
358	38.9684	-108.077	4.31706e+06	753531	Flowing Park Southeast	Southeast Bench	DS	Green River	9770	2978	9216	2809	554	169	2119	646	192	186	6	8	18	10	0.26	3.82	1870	8.41	Complex			DM	51765	0.0518	359751	5.556	0.00036	0.35975
359	38.9658	-108.074	4.31753e+06	753574	Flowing Park Southeast	Southeast Bench	EF	Green River	9851	3003	9268	2825	583	178	3034	925	130	126	4	8	13	5	0.19	5.2	1781	10.09	Successive			DM	53788	0.0538	377511	5.5769	0.000378	0.37751
360	38.9693	-108.072	4.31706e+06	754318	Flowing Park Southeast	Southeast Bench	EF	Wasatch	9678	2950	8647	2636	1031	314	6075	1852	170	175	5	18	21	3	0.17	5.89	1873	8.97	Single			DR	258418	0.2584	2715713	6.4339	0.002716	2.71571
361	38.9656	-108.065	4.31823e+06	754145	Flowing Park Southeast	Southeast Bench	ES	Goodenough	9869	3008	9583	2921	286	87	1732	528	192	170	22	6	9	3	0.17	6.06	1802	10.34	Single			DM	75157	0.0752	574882	5.7596	0.000575	0.57488
362	38.9762	-108.066	4.31777e+06	756317	Flowing Park Southeast	Southeast Bench	ES	Wasatch	8863	2701	8507	2593	356	109	2414	736	231	214	17	9	22	13	0.15	6.78	1765	12.41	Single			DM	35432	0.0354	223362	5.349	0.000223	0.22336
363	38.9714	-108.041	4.318e+06	756374	Flowing Park Southeast	Southeast Bench	EF	Wasatch	8923	2720	8690	2649	233	71	1273	388	234	239	5	9	29	20	0.18	5.46	1797	12.11	Single			DM	16860	0.0169	87803	4.9435	8.8e-05	0.0878
364	38.9735	-108.041	4.31722e+06	756267	Flowing Park Southeast	Southeast Bench	EF	Wasatch	8641	2634	8267	2520	374	114	2211	674	246	239	7	8	11	3	0.17	5.91	1701	12.12	Single			DM	25359	0.0254	146683	5.1664	0.000147	0.14668
365	38.9669	-108.042	4.31943e+06	756248	Flowing Park Southeast	Southeast Bench	EF	Goodenough	10053	3064	9187	2800	866	264	5307	1618	148	184	42	9	33	24	0.16	6.13	1823	9.26	Complex	Qefi		DM	220713	0.2207	2227267	6.3478	0.002227	2.22727
366	38.9856	-108.042	4.31894e+06	756264	Flowing Park Southeast	Southeast Bench	ES	Green River	9676	2949	9168	2794	508	155	2286	697	239	244	5	6	7	1	0.22	4.5	1756	9.75	Multiple			DM	74433	0.0744	567926	5.7543	0.000568	0.56793
367	38.982	-108.042	4.31875e+06	756401	Flowing Park Southeast	Southeast Bench	DS	Green River	9546	2910	9199	2804	347	106	1230	375	239	225	14	19	26	7	0.28	3.54	1850	8.74	Single			DY	9075	0.0091	40300	4.6053	4e-05	0.0403
368	38.9801	-108.04	4.31856e+06	756405	Flowing Park Southeast	Southeast Bench	DS	Wasatch	9304	2836	9121	2780	183	56	686	209	194	190	4	14	23	9	0.27	3.75	1852	6.37	Single			DR	9983	0.01	45433	4.6574	4.5e-05	0.04543
369	38.9785	-108.04	4.31864e+06	756508	Flowing Park Southeast	Southeast Bench	DS	Green River	9448	2880	9229	2813	219	67	882	269	200	194	6	21	21	0	0.25	4.03	1875	7.52	Single			DR	11619	0.0116	54982	4.7402	5.5e-05	0.05498
370	38.9792	-108.039	4.31865e+06	756390	Flowing Park Southeast	Southeast Bench	DS	Green River	9465	2885	9117	2779	348	106	1456	444	214	209	5	22	26	4	0.24	4.18	1861	7.66	Single			DR	16547	0.0165	85759	4.9333	8.6e-05	0.08576
371	38.9793	-108.04	4.31886e+06	756559	Flowing Park Southeast	Southeast Bench	DS	Green River	9659	2944	9410	2868	249	76	761	232	281	256	25	3	24	21	0.33	3.06	1789	9.34	Single			DM	17046	0.017	89024	4.9495	8.9e-05	0.08902
372	38.9813	-108.039	4.31868e+06	757392	Flowing Park Southeast	Southeast Bench	DS	Green River	9458	2883	9138	2785	320	98	1004	306	188	163	25	22	27	5	0.32	3.14	1877	9.64	Single			DM	15312	0.0153	77795	4.891	7.8e-05	0.0778
373	38.9793	-108.029	4.31821e+06	756878	Flowing Park Southeast	Southeast Bench	DS	Green River	9620	2932	8713	2656	907	276	5176	1578	160	174	14	6	35	29	0.18	5.71	1880	9.09	Composite			DM	537576	0.5376	6820572	6.8338	0.006821	6.82057
374	38.9752	-108.035	4.31934e+06	758430	Flowing Park Southeast	Southeast Bench	EF	Green River	9628	2935	8742	2665	886	270	4474	1364	201	205	4	2	15	13	0.2	5.05	1745	10.23	Multiple	Qefi		DY	300974	0.301	3289416	6.5171	0.003289	3.28942
375	38.9823	-108.015	4.31857e+06	759094	Flowing Park Southeast	Southeast Bench	EF	Green River	9230	2813	8500	2591	730	223	6344	1934	160	150	10	1	13	12	0.12	8.69	1743	11.96	Complex	Qefr		DY	743457	0.7435	10253075	7.0109	0.010253	10.2531
376	38.9828	-108.011	4.3179e+06	759488	Flowing Park Southeast	Southeast Bench	EF	Green River	9806	2989	7995	2437	1811	552	10165	3099	187	167	20	7	17	10	0.18	5.61	1847	10.57	Complex	Qefr		DM	670404	0.6704	9002896	6.9544	0.009003	9.0029
377	38.9812	-108.004	4.31928e+06	760075	Flowing Park Southeast	Southeast Bench	DS	Green River	9278	2828	8849	2697	429	131	1155	352	192	210	18	9	11	2	0.37	2.69	1801	6.88	Single			DR	27585	0.0276	163051	5.2123	0.000163	0.16305
378	38.9839	-107.998	4.3188e+06	761268	Flowing Park Southeast	Southeast Bench	DS	Green River	9348	2849	7542	2299	1806	550	8472	2583	154	118	36	15	33	18	0.21	4.69	1849	11.5	Composite			DY	1833978	1.834	31904394	7.5039	0.031904	31.9044	Ward Creek Landslide Complex, Parts have reactived
379	38.9792	-107.984	4.31824e+06	760949	Flowing Park Southeast	Southeast Bench	DS	Wasatch	8369	2551	7932	2418	437	133	1358	414	54	71	17	1	23	22	0.32	3.11	1703	9.51	Single			DY	45776	0.0458	308226	5.4889	0.000308	0.30823
380	38.9743	-107.988	4.32055e+06	760311	Flowing Park Southeast	Southeast Bench	EF	Goodenough	9679	2950	8741	2664	938	286	4271	1302	106	110	4	5	10	5	0.22	4.55	1743	10.92	Complex			DM	253479	0.2535	2650620	6.4233	0.002651	2.65062
381	38.9939	-107.992	4.32079e+06	760402	Flowing Park Southeast	Southeast Bench	DS	Green River	9604	2927	9329	2843	275	84	1086	331	89	88	1	3	7	4	0.25	3.95	1701	9.81	Single			DM	26365	0.0264	154036	5.1876	0.000154	0.15404
382	38.9974	-107.993	4.32091e+06	760477	Flowing Park Southeast	Southeast Bench	DS	Green River	9570	2917	9131	2783	439	134	1450	442	127	125	2	6	9	3	0.3	3.3	1751	8.85	Single			DM	32235	0.0322	198323	5.2974	0.000198	0.19832
383	38.9981	-107.991	4.32114e+06	760573	Flowing Park Southeast	Southeast Bench	EF	Green River	9575	2918	9161	2792	414	126	1233	376	106	115	9	6	10	4	0.34	2.98	1729	9.6	Single			DM	8449	0.0084	36839	4.5663	3.7e-05	0.03684
384	39.0004	-107.99	4.32034e+06	761589	Flowing Park Southeast	Southeast Bench	RS-DS	Goodenough	9692	2954	8468	2581	1224	373	6061	1848	172	168	4	8	20	12	0.2	4.95	1818	10.23	Composite			DM	685829	0.6858	9264077	6.9668	0.009264	9.26408
385	38.9972	-107.977	4.32123e+06	763610	Flowing Park Southeast	Southeast Bench	EF	Green River	9285	2830	8889	2709	396	121	1565	477	90	102	12	6	11	5	0.25	3.95	1650	11.53	Single			DY	24917	0.0249	143480	5.1568	0.000143	0.14348
386	39.0006	-107.956	4.32293e+06	764722	Flowing Park Southeast	Southeast Bench	EF	Goodenough	9819	2993	7979	2432	1840	561	13792	4205	287	261	26	6	25	19	0.13	7.5	1910	9.7	Composite			DR	2310220	2.3102	42647799	7.6299	0.042648	42.6478	Kiser Creek Slide
387	39.0081	-107.94	4.32213e+06	765357	Flowing Park Southeast	Southeast Bench	EF	Green River	9294	2833	8835	2693	459	140	1230	375	213	220	7	26	44	18	0.37	2.68	1852	10.36	Single		2005 CE	AR	19298	0.0193	104055	5.0173	0.000104	0.10406	Andy Gump Slide--Eyewitness account in 2005
388	39.008	-107.936	4.32221e+06	766216	Flowing Park Southeast	Southeast Bench	EF	Green River	9335	2845	9041	2756	294	90	745	227	165	162	3	18	20	2	0.39	2.53	1860	11.61	Single			DY	10033	0.01	45722	4.6601	4.6e-05	0.04572
389	39.0085	-107.926	4.32233e+06	767055	Flowing Park Southeast	Hells Kitchen	EF	Goodenough	9707	2959	8990	2740	717	219	2135	651	252	250	2	6	19	13	0.34	2.98	1744	8.73	Complex			DR	66437	0.0664	492313	5.6922	0.000492	0.49231
390	39.0092	-107.916	4.32246e+06	766989	Flowing Park Southeast	Hells Kitchen	EF	Green River	9569	2917	9313	2839	256	78	787	240	266	243	23	8	10	2	0.33	3.08	1750	8.65	Single			DR	7487	0.0075	31644	4.5003	3.2e-05	0.03164
391	39.0107	-107.916	4.31919e+06	767894	Leon Peak South	Happy Hollow Gulch	EF	Wasatch	8635	2632	7994	2437	641	195	2332	711	215	212	3	7	31	24	0.27	3.64	1766	11.24	Single			DY	61063	0.0611	442781	5.6462	0.000443	0.44278
392	38.9808	-107.907	4.32101e+06	766866	Flowing Park Southeast	Happy Hollow Gulch	EF	Green River	9160	2792	8148	2484	1012	308	5796	1767	227	225	2	13	23	10	0.17	5.73	1772	8.32	Successive			DR	541374	0.5414	6881201	6.8377	0.006881	6.8812
393	38.9975	-107.919	4.31957e+06	774402	Leon Peak South	Happy Hollow Gulch	DS	Wasatch	8792	2680	8387	2556	405	123	2198	670	180	149	31	12	17	5	0.18	5.43	1792	10.45	Single			DM	72518	0.0725	549624	5.7401	0.00055	0.54962
394	38.9821	-107.832	4.32336e+06	770524	Leon Peak South	Happy Hollow Gulch	EF	Green River	9901	3018	9159	2792	742	226	2985	910	175	146	29	8	10	2	0.25	4.02	1791	8.32	Multiple			DR	73983	0.074	563613	5.751	0.000564	0.56361
395	39.0169	-107.874	4.32415e+06	771603	Leon Peak South	Happy Hollow Gulch	EF	Green River	9924	3025	9121	2780	803	245	4933	1504	92	105	13	3	16	13	0.16	6.14	1715	9.25	Complex			DM	397429	0.3974	4665531	6.6689	0.004666	4.66553
396	39.0257	-107.865	4.32588e+06	772966	Leon Peak South	Durkee Ridge	EF	Green River	10162	3097	9706	2958	456	139	2706	825	260	256	4	3	10	7	0.17	5.93	1681	9.74	Composite			DM	106096	0.1061	886792	5.9478	0.000887	0.88679
397	39.0391	-107.847	4.32544e+06	775423	Leon Peak South	Durkee Ridge	RS	Green River	10015	3053	9619	2932	396	121	1834	559	175	170	5	18	28	10	0.22	4.63	1919	9.51	Single			DM	45488	0.0455	305786	5.4854	0.000306	0.30579
398	39.0346	-107.818	4.32554e+06	775606	Leon Peak South	Durkee Ridge	RS	Green River	10049	3063	9720	2963	329	100	1266	386	161	166	5	18	27	9	0.26	3.85	1911	10.81	Single			DM	25683	0.0257	149046	5.1733	0.000149	0.14905
399	39.0355	-107.816	4.32545e+06	775153	Leon Peak South	Durkee Ridge	RS	Green River	10272	3131	9630	2935	642	196	2562	781	133	100	33	6	15	9	0.25	3.99	1784	7.6	Single			DR	59354	0.0594	427259	5.6307	0.000427	0.42726
400	39.0348	-107.821	4.32623e+06	776769	Leon Peak South	Durkee Ridge	DS	Green River	10280	3133	10016	3053	264	80	1043	318	268	265	3	8	21	13	0.25	3.95	1743	10.15	Single			DM	21479	0.0215	119051	5.0757	0.000119	0.11905
401	39.0413	-107.802	4.32659e+06	776766	Leon Peak South	Durkee Ridge	DS	Green River	10376	3163	9904	3019	472	144	2378	725	274	263	11	9	24	15	0.2	5.04	1745	10	Successive			DM	80075	0.0801	622570	5.7942	0.000623	0.62257
402	39.0445	-107.802	4.32569e+06	775407	Leon Peak South	Durkee Ridge	RS	Green River	10313	3143	9929	3026	384	117	1086	331	141	147	6	9	19	10	0.35	2.83	1899	8.62	Single			DM	34832	0.0348	218620	5.3397	0.000219	0.21862
403	39.0368	-107.818	4.32543e+06	773813	Leon Peak South	Durkee Ridge	RS	Green River	10222	3116	9533	2906	689	210	2076	633	174	181	7	4	19	15	0.33	3.01	1779	8.11	Single			DM	28841	0.0288	172443	5.2366	0.000172	0.17244
404	39.0351	-107.837	4.32538e+06	772756	Leon Peak South	Durkee Ridge	EF	Green River	10013	3052	9542	2908	471	144	2158	658	265	256	9	6	22	16	0.22	4.58	1674	7.21	Single			DR	19203	0.0192	103413	5.0146	0.000103	0.10341
405	39.0354	-107.848	4.32558e+06	772943	Leon Peak South	Durkee Ridge	EF	Green River	9980	3042	9758	2974	222	68	1076	328	250	264	14	8	11	3	0.21	4.85	1753	8.71	Single			DR	10280	0.0103	47142	4.6734	4.7e-05	0.04714
406	39.0367	-107.847	4.32567e+06	772929	Leon Peak South	Durkee Ridge	EF	Green River	10002	3049	9737	2968	265	81	1276	389	275	269	6	6	10	4	0.21	4.81	1754	9.9	Single			DR	17564	0.0176	92441	4.9659	9.2e-05	0.09244
407	39.0375	-107.847	4.32484e+06	771610	Leon Peak South	Happy Hollow Gulch	EF	Green River	9913	3021	9427	2873	486	148	1965	599	106	128	22	5	13	8	0.25	4.04	1755	8.51	Single			DM	65452	0.0655	483157	5.6841	0.000483	0.48316
408	39.0304	-107.862	4.31963e+06	767215	Leon Peak South	Happy Hollow Gulch	DS	Green River	9024	2751	7537	2297	1487	453	13035	3974	235	198	37	4	22	18	0.11	8.77	1748	8.02	Single			DR	1857754	1.8578	32425269	7.5109	0.032425	32.4253
409	38.9849	-107.915	4.31875e+06	768773	Flowing Park Southeast	Happy Hollow Gulch	EF	Green River	9612	2930	7071	2155	2541	774	23334	7114	193	232	39	5	19	14	0.11	9.18	1860	7.88	Multiple			DR	2772138	2.7721	53631294	7.7294	0.053631	53.6313	Horse Creek Slide
410	38.9784	-107.899	4.32602e+06	782620	Leon Peak South	Durkee Ridge	DS	Goodenough	10996	3352	10094	3077	902	275	4441	1354	218	240	22	7	26	19	0.2	4.92	1854	10.28	Complex			DM	270181	0.2702	2872024	6.4582	0.002872	2.87202
411	39.0376	-107.735	4.32628e+06	782353	Leon Peak South	Durkee Ridge	EF	Goodenough	10777	3285	10233	3119	544	166	2312	705	237	204	33	11	22	11	0.24	4.25	1920	9.8	Single			DM	61616	0.0616	447832	5.6511	0.000448	0.44783
412	39.04	-107.738	4.32511e+06	784122	Leon Peak South	Durkee Ridge	ES	Goodenough	10449	3185	9895	3016	554	169	2867	874	154	147	7	4	28	24	0.19	5.17	1885	9.38	Successive			DM	152875	0.1529	1403651	6.1473	0.001404	1.40365
413	39.0289	-107.718	4.31951e+06	782167	Leon Peak South	Duke Basin	ES	Wasatch	9525	2903	8786	2678	739	225	5051	1540	159	187	28	3	10	7	0.15	6.84	1860	9.73	Complex			DM	611000	0.611	8011653	6.9037	0.008012	8.01165
414	38.9792	-107.743	4.31836e+06	778608	Leon Peak South	Durkee Ridge	EF	Wasatch	8724	2659	7822	2384	902	275	5665	1727	238	227	11	7	13	6	0.16	6.28	1768	12.06	Complex			DM	393394	0.3934	4606053	6.6633	0.004606	4.60605
415	38.9732	-107.783	4.31995e+06	779074	Leon Peak South	Durkee Ridge	EF	Wasatch	9418	2871	8690	2649	728	222	4353	1327	191	169	22	9	13	4	0.17	5.98	1812	11.55	Composite			DM	147065	0.1471	1336914	6.1261	0.001337	1.33691
416	38.9841	-107.778	4.32042e+06	778628	Leon Peak South	Durkee Ridge	EF	Wasatch	9451	2881	9062	2762	389	119	2004	611	173	178	5	4	8	4	0.19	5.15	1802	10.3	Single			DM	28011	0.028	166224	5.2207	0.000166	0.16622
417	38.9879	-107.783	4.32037e+06	778936	Leon Peak South	Durkee Ridge	EF	Wasatch	9348	2849	9051	2759	297	91	1338	408	215	219	4	6	9	3	0.22	4.51	1782	12.26	Composite			DM	28179	0.0282	167475	5.2239	0.000167	0.16748
418	38.987	-107.779	4.32032e+06	778838	Leon Peak South	Durkee Ridge	EF	Wasatch	9339	2847	9094	2772	245	75	1027	313	176	169	7	4	9	5	0.24	4.19	1776	10.92	Single			DM	9088	0.0091	40371	4.6061	4e-05	0.04037
419	38.9871	-107.781	4.32055e+06	779077	Leon Peak South	Durkee Ridge	ES	Wasatch	9422	2872	9351	2850	71	22	561	171	168	171	3	8	9	1	0.13	7.9	1804	11.09	Single			DM	6760	0.0068	27830	4.4445	2.8e-05	0.02783
420	38.9895	-107.778	4.31667e+06	778672	Leon Peak South	Durkee Ridge	DS	Mesaverde	8694	2650	7645	2330	1049	320	4723	1440	326	321	5	3	33	30	0.22	4.5	1716	10.41	Complex			DM	239005	0.239	2461755	6.3912	0.002462	2.46176
421	38.9564	-107.787	4.31648e+06	778493	Leon Peak South	Durkee Ridge	DS	Mesaverde	8601	2622	8211	2503	390	119	1614	492	297	291	6	4	17	13	0.24	4.14	1702	11.71	Multiple			DM	45258	0.0453	303847	5.4827	0.000304	0.30385
422	38.9531	-107.786	4.31815e+06	777590	Leon Peak South	Durkee Ridge	DS	Mesaverde	8624	2629	7992	2436	632	193	2453	748	143	165	22	6	11	5	0.26	3.88	1762	9.81	Successive			DM	121435	0.1214	1050869	6.0215	0.001051	1.05087
423	38.9683	-107.795	4.31813e+06	777975	Leon Peak South	Durkee Ridge	DS	Mesaverde	8348	2544	8109	2472	239	73	561	171	165	154	11	15	19	4	0.43	2.35	1761	10.1	Single			DM	6004	0.006	23974	4.3797	2.4e-05	0.02397
424	38.9681	-107.792	4.31831e+06	777964	Leon Peak South	Durkee Ridge	DS	Mesaverde	8580	2615	8141	2481	439	134	1315	401	161	167	6	11	13	2	0.33	3	1780	9.47	Single			DM	33792	0.0338	210443	5.3231	0.00021	0.21044
425	38.9696	-107.792	4.31791e+06	776867	Leon Peak South	Durkee Ridge	ES	Mesaverde	8322	2537	8175	2492	147	45	485	148	194	196	2	9	11	2	0.3	3.3	1760	11.87	Single			DM	11245	0.0112	52770	4.7224	5.3e-05	0.05277
426	38.9665	-107.804	4.3176e+06	776710	Leon Peak South	Durkee Ridge	ES	Mesaverde	8197	2498	7889	2405	308	94	689	210	124	139	15	17	25	8	0.45	2.24	1731	9.54	Single			DM	6645	0.0066	27236	4.4351	2.7e-05	0.02724
427	38.9637	-107.806	4.31767e+06	776790	Leon Peak South	Durkee Ridge	ES	Mesaverde	8126	2477	7910	2411	216	66	686	209	159	172	13	15	26	11	0.32	3.17	1768	10.41	Single			DM	4996	0.005	19030	4.2794	1.9e-05	0.01903
428	38.9643	-107.805	4.31952e+06	778469	Leon Peak South	Durkee Ridge	DS	Wasatch	9026	2751	8701	2652	325	99	836	255	187	191	4	14	16	2	0.39	2.57	1819	10.61	Single			DM	18459	0.0185	98399	4.993	9.8e-05	0.0984
429	38.9804	-107.785	4.31994e+06	778732	Leon Peak South	Durkee Ridge	DS	Wasatch	9237	2815	8860	2701	377	115	1397	426	150	187	37	12	20	8	0.27	3.71	1812	13.32	Composite			DY	38337	0.0383	246628	5.392	0.000247	0.24663
430	38.9836	-107.782	4.32422e+06	787175	Leon Peak South	Duke Basin	EF	Wasatch	10580	3225	9747	2971	833	254	8872	2705	323	334	11	6	25	19	0.09	10.65	1880	9.9	Composite			DM	1049004	1.049	15806385	7.1988	0.015806	15.8064
431	39.0182	-107.685	4.32286e+06	786426	Leon Peak South	Duke Basin	EF	Wasatch	10324	3147	9414	2869	910	277	7095	2163	206	245	39	6	14	8	0.13	7.8	1785	9.34	Complex			DM	693407	0.6934	9392942	6.9728	0.009393	9.39294
432	39.0079	-107.692	4.32268e+06	787427	Leon Peak South	Duke Basin	EF	Wasatch	10648	3246	9550	2911	1098	335	7905	2410	247	259	12	2	25	23	0.14	7.2	1800	10.34	Composite			DM	1125818	1.1258	17274972	7.2374	0.017275	17.275
433	39.0059	-107.681	4.32352e+06	785710	Leon Peak South	Duke Basin	EF	Wasatch	9748	2971	9239	2816	509	155	11864	3617	275	306	31	4	16	12	0.04	23.31	1703	6.57	Successive			DR	969670	0.9697	14318423	7.1559	0.014318	14.3184
434	39.0051	-107.705	4.30071e+06	765006	Flowing Park Southeast	Antelope Hill	EF	Mancos	5743	1750	5478	1670	265	81	1223	373	149	159	10	4	24	20	0.22	4.62	1619	6.92	Single			DM	11942	0.0119	56915	4.7552	5.7e-05	0.05692
435	38.8157	-107.948	4.3011e+06	765438	Flowing Park Southeast	Antelope Hill	EF	Mancos	5637	1718	5573	1699	64	20	377	115	189	170	29	16	18	2	0.17	5.89	1635	7.84	Single			DY	3799	0.0038	13487	4.1299	1.3e-05	0.01349
436	38.8187	-107.943	4.30084e+06	765533	Flowing Park Southeast	Antelope Hill	EF	Mancos	5729	1746	5497	1675	232	71	807	246	242	233	9	18	20	2	0.29	3.48	1596	9.01	Successive			DY	6053	0.0061	24224	4.3842	2.4e-05	0.02422
437	38.8164	-107.942	4.30075e+06	765532	Flowing Park Southeast	Antelope Hill	ES	Mancos	5541	1689	5492	1674	49	15	358	109	225	230	5	13	14	1	0.14	7.3	1540	6.43	Single			DM	1466	0.0015	4073	3.6099	4e-06	0.00407
438	38.8155	-107.942	4.30247e+06	767153	Flowing Park Southeast	Antelope Hill	EF	Mancos	5637	1718	5436	1657	201	61	925	282	129	143	14	2	4	2	0.22	4.6	1515	10.45	Successive			DM	7485	0.0075	31635	4.5002	3.2e-05	0.03164
439	38.8308	-107.923	4.30771e+06	768717	Leon Peak South	Cedar Mesa	ES	Mancos	6318	1926	6042	1842	276	84	892	272	237	235	2	1	27	26	0.31	3.23	1587	13.15	Single			DY	44546	0.0445	297846	5.474	0.000298	0.29785
440	38.8772	-107.902	4.3075e+06	769467	Leon Peak South	Cedar Mesa	ES	Mancos	6186	1885	6100	1859	86	26	522	159	181	180	1	17	29	12	0.16	6.06	1702	13.15	Single			DY	7478	0.0075	31594	4.4996	3.2e-05	0.03159
441	38.8751	-107.894	4.30713e+06	769617	Leon Peak South	Cedar Mesa	ES	Mancos	6224	1897	6063	1848	161	49	768	234	239	252	13	3	24	21	0.21	4.77	1587	13.7	Single			DY	38103	0.0381	244730	5.3887	0.000245	0.24473
442	38.8717	-107.892	4.30651e+06	769893	Leon Peak South	Cedar Mesa	ES	Mancos	6156	1876	6047	1843	109	33	508	155	145	137	8	9	25	16	0.21	4.66	1616	12.64	Single			DY	10117	0.0101	46203	4.6647	4.6e-05	0.0462
443	38.8661	-107.889	4.30621e+06	769876	Leon Peak South	Cedar Mesa	EF	Mancos	6180	1884	5974	1821	206	63	813	248	284	292	8	5	27	22	0.25	3.95	1337	13	Single			DY	14976	0.015	75651	4.8788	7.6e-05	0.07565
444	38.8633	-107.89	4.30641e+06	771514	Leon Peak South	Cedar Mesa	ES	Mancos	6095	1858	5940	1811	155	47	410	125	155	134	21	15	27	12	0.38	2.65	1637	10.2	Single			DY	8033	0.008	34571	4.5387	3.5e-05	0.03457
445	38.8646	-107.871	4.30662e+06	771713	Leon Peak South	Cedar Mesa	ES	Mancos	6136	1870	5953	1814	183	56	895	273	154	134	20	3	27	24	0.2	4.89	1603	13.62	Single			DY	17239	0.0172	90293	4.9557	9e-05	0.09029
446	38.8664	-107.868	4.3077e+06	772672	Leon Peak South	Cedar Mesa	ES	Mancos	6224	1897	6083	1854	141	43	361	110	165	151	14	13	27	14	0.39	2.56	1646	11.06	Single			DY	9244	0.0092	41246	4.6154	4.1e-05	0.04125
447	38.8759	-107.857	4.30801e+06	772939	Leon Peak South	Cedar Mesa	ES	Mancos	6232	1900	6113	1863	119	36	390	119	144	158	14	16	17	1	0.3	3.28	1633	10.7	Single			DY	8245	0.0082	35724	4.553	3.6e-05	0.03572
448	38.8786	-107.854	4.31586e+06	777942	Leon Peak South	Durkee Ridge	EF	Mesaverde	8010	2441	7697	2346	313	95	708	216	323	340	17	1	16	15	0.44	2.26	1730	9.85	Single			DR	14864	0.0149	74942	4.8747	7.5e-05	0.07494
449	38.9476	-107.793	4.31963e+06	779629	Leon Peak South	Durkee Ridge	EF	Wasatch	9297	2834	8815	2687	482	147	2535	773	222	206	16	12	14	2	0.19	5.26	1812	10.4	Single			DM	60128	0.0601	434280	5.6378	0.000434	0.43428
450	38.981	-107.772	4.31937e+06	779398	Leon Peak South	Durkee Ridge	ES	Wasatch	9023	2750	8770	2673	253	77	807	246	205	192	13	15	21	6	0.31	3.19	1825	11.79	Single			DY	15696	0.0157	80250	4.9044	8e-05	0.08025
451	38.9788	-107.775	4.31641e+06	780903	Leon Peak South	Duke Basin	ES	Mesaverde	8265	2519	7879	2402	386	118	892	272	157	140	17	19	29	10	0.43	2.31	1752	8.98	Single			DM	29496	0.0295	177375	5.2489	0.000177	0.17738
452	38.9517	-107.759	4.31682e+06	780622	Leon Peak South	Duke Basin	EF	Mesaverde	8561	2609	8339	2542	222	68	853	260	106	108	2	14	27	13	0.26	3.84	1638	9.95	Single			DM	10450	0.0105	48124	4.6824	4.8e-05	0.04812
453	38.9556	-107.761	4.31701e+06	780668	Leon Peak South	Duke Basin	ES	Mesaverde	8490	2588	8313	2534	177	54	656	200	80	84	4	10	16	6	0.27	3.71	1626	10.99	Successive			DM	19946	0.0199	108462	5.0353	0.000108	0.10846
454	38.9572	-107.761	4.31692e+06	781001	Leon Peak South	Duke Basin	ES	Mesaverde	8299	2530	8108	2471	191	58	843	257	77	91	14	6	8	2	0.23	4.41	1582	8.47	Successive			DM	22758	0.0228	128029	5.1073	0.000128	0.12803
455	38.9562	-107.757	4.32197e+06	783496	Leon Peak South	Duke Basin	EF	Wasatch	9510	2899	9238	2816	272	83	2414	736	202	226	24	17	24	7	0.11	8.88	1859	9.27	Complex			DM	74300	0.0743	566655	5.7533	0.000567	0.56666
456	39.0008	-107.726	4.32219e+06	783019	Leon Peak South	Duke Basin	ES	Wasatch	9721	2963	9389	2862	332	101	1797	548	250	210	40	5	24	19	0.18	5.41	1884	9.2	Successive			DM	112658	0.1127	956280	5.9806	0.000956	0.95628
457	39.003	-107.732	4.3247e+06	791815	Leon Peak South	Hubbard Park	RS-EF	Green River	10920	3328	9410	2868	1510	460	16436	5011	112	88	24	17	41	24	0.09	10.88	1826	10.93	Composite			DM	4957175	4.9572	111367914	8.0468	0.111368	111.368	West Hubbard Creek Slide
458	39.0223	-107.633	4.32685e+06	791872	Leon Peak South	Hubbard Park	ES	Green River	10430	3179	9799	2987	631	192	2670	814	82	78	4	16	33	17	0.24	4.23	1367	10.92	Multiple			DM	169346	0.1693	1596343	6.2031	0.001596	1.59634
459	39.0416	-107.628	4.3266e+06	792474	Leon Peak South	Hubbard Park	EF	Green River	9963	3037	9578	2919	385	117	2168	661	80	59	21	3	20	17	0.18	5.63	1597	10.03	Multiple			DM	147870	0.1479	1346128	6.1291	0.001346	1.34613
460	39.0395	-107.621	4.32641e+06	792692	Leon Peak South	Hubbard Park	ES	Green River	9928	3026	9686	2952	242	74	1230	375	61	73	12	5	21	16	0.2	5.08	1731	8.39	Single			DM	66759	0.0668	495322	5.6949	0.000495	0.49532
461	39.0377	-107.618	4.32697e+06	784721	Leon Peak South	Hubbard Park	ES	Green River	10215	3114	10074	3071	141	43	754	230	231	232	1	9	21	12	0.19	5.35	1865	10.28	Single			DY	13500	0.0135	66400	4.8222	6.6e-05	0.0664
462	39.0454	-107.71	4.3271e+06	784622	Leon Peak South	Hubbard Park	ES	Green River	10301	3140	10085	3074	216	66	1332	406	234	217	17	11	23	12	0.16	6.17	1828	10.45	Single			DY	32292	0.0323	198768	5.2983	0.000199	0.19877
463	39.0466	-107.711	4.32729e+06	784546	Leon Peak South	Hubbard Park	ES	Green River	10372	3161	10117	3084	255	78	1699	518	210	211	1	6	13	7	0.15	6.66	1817	10.78	Single			DY	55493	0.0555	392617	5.594	0.000393	0.39262
464	39.0483	-107.712	4.32735e+06	784381	Leon Peak South	Hubbard Park	ES	Green River	10441	3182	10148	3093	293	89	1542	470	185	195	10	6	10	4	0.19	5.26	1841	8.43	Single			DM	30731	0.0307	186764	5.2713	0.000187	0.18676
465	39.0489	-107.714	4.33118e+06	785836	Leon Peak South	Hubbard Park	ES	Basalt	10844	3305	10418	3175	426	130	2152	656	210	188	22	1	15	14	0.2	5.05	1765	9.72	Single			DM	70670	0.0707	532070	5.726	0.000532	0.53207
466	39.0829	-107.696	4.33113e+06	786038	Leon Peak South	Hubbard Park	ES	Goodenough	10828	3300	10446	3184	382	116	1332	406	169	166	3	2	28	26	0.29	3.49	1895	9.61	Single			DM	16899	0.0169	88061	4.9448	8.8e-05	0.08806
467	39.0825	-107.693	4.33216e+06	788047	Leon Peak North	Hubbard Park	ES	Green River	10437	3181	10112	3082	325	99	1289	393	68	56	12	18	36	18	0.25	3.97	1282	11.87	Complex			DM	70122	0.0701	526888	5.7217	0.000527	0.52689
468	39.091	-107.67	4.33193e+06	788191	Leon Peak North	Hubbard Park	ES	Green River	10417	3175	10194	3107	223	68	548	167	34	55	21	26	38	12	0.41	2.46	1305	11.27	Complex			DM	9199	0.0092	40997	4.6128	4.1e-05	0.041
469	39.0889	-107.668	4.33708e+06	784125	Leon Peak North	The Flat Tops	EF	Green River	10592	3228	10036	3059	556	169	3569	1088	96	86	10	5	10	5	0.16	6.42	1724	11.66	Multiple			DM	77176	0.0772	594369	5.7741	0.000594	0.59437
470	39.1366	-107.713	4.33889e+06	784031	Leon Peak North	The Flat Tops	DS	Green River	10408	3172	9778	2980	630	192	2696	822	43	56	13	16	33	17	0.23	4.28	1423	11.16	Complex			DM	234439	0.2344	2402776	6.3807	0.002403	2.40278
471	39.1529	-107.713	4.33855e+06	783938	Leon Peak North	The Flat Tops	EF	Green River	10570	3222	10041	3060	529	161	1909	582	26	38	12	14	28	14	0.28	3.61	1428	10.98	Complex			DM	36398	0.0364	231044	5.3637	0.000231	0.23104
472	39.1499	-107.714	4.34059e+06	783665	Leon Peak North	The Flat Tops	DS	Green River	10590	3228	9456	2882	1134	346	6107	1862	34	54	20	1	17	16	0.19	5.39	1777	11.35	Composite			DM	421654	0.4217	5025810	6.7012	0.005026	5.02581
473	39.1661	-107.719	4.34036e+06	783196	Leon Peak North	The Flat Tops	DS	Green River	10095	3077	9884	3013	211	64	850	259	60	70	10	16	24	8	0.25	4.03	1519	11.7	Single			DM	13152	0.0132	64254	4.8079	6.4e-05	0.06425
474	39.1664	-107.722	4.34014e+06	782874	Leon Peak North	The Flat Tops	DS	Green River	10579	3224	10043	3061	536	163	2201	671	32	42	10	6	27	21	0.24	4.11	1734	10.82	Successive			DM	97760	0.0978	800091	5.9031	0.0008	0.80009
475	39.1645	-107.725	4.34088e+06	782885	Leon Peak North	The Flat Tops	EF	Green River	9891	3015	9715	2961	176	54	1161	354	23	40	17	16	25	9	0.15	6.6	1402	11.5	Single			DM	17520	0.0175	92147	4.9645	9.2e-05	0.09215
476	39.1711	-107.726	4.34031e+06	782680	Leon Peak North	The Flat Tops	EF	Green River	10551	3216	10144	3092	407	124	1574	480	15	27	12	3	23	20	0.26	3.87	1729	12.21	Single			DM	31093	0.0311	189531	5.2777	0.00019	0.18953
477	39.1661	-107.728	4.34023e+06	782531	Leon Peak North	The Flat Tops	EF	Green River	10519	3206	10065	3068	454	138	1975	602	2	12	10	2	14	12	0.23	4.35	1672	11.24	Single			DM	28360	0.0284	168828	5.2274	0.000169	0.16883
478	39.1664	-107.73	4.34113e+06	782662	Leon Peak North	The Flat Tops	ES	Green River	9868	3008	9523	2903	345	105	1991	607	24	37	13	14	21	7	0.17	5.77	1483	11.94	Successive			DM	61174	0.0612	443798	5.6472	0.000444	0.4438
479	39.1735	-107.728	4.34188e+06	781687	Leon Peak North	The Flat Tops	ES	Green River	9810	2990	9439	2877	371	113	3165	965	12	4	8	8	13	5	0.12	8.53	1579	10.69	Successive			DM	169108	0.1691	1593526	6.2024	0.001594	1.59353
480	39.1797	-107.739	4.34062e+06	780925	Leon Peak North	The Flat Tops	ES	Green River	10431	3179	9923	3025	508	155	3414	1041	300	305	5	3	10	7	0.15	6.72	1768	11.99	Successive			DM	218226	0.2182	2195761	6.3416	0.002196	2.19576
481	39.1695	-107.748	4.34056e+06	780568	Leon Peak North	The Flat Tops	ES	Green River	10387	3166	9904	3019	483	147	2942	897	346	331	15	5	10	5	0.16	6.09	1672	10.94	Successive			DM	131612	0.1316	1162757	6.0655	0.001163	1.16276
482	39.169	-107.752	4.34069e+06	780266	Leon Peak North	The Flat Tops	ES	Green River	10325	3147	9890	3014	435	133	2339	713	360	350	10	2	17	15	0.19	5.38	1641	11.71	Successive			DM	64876	0.0649	477817	5.6793	0.000478	0.47782
483	39.1703	-107.756	4.34145e+06	780590	Leon Peak North	The Flat Tops	ES	Green River	9885	3013	9357	2852	528	161	3296	1005	353	337	16	12	26	14	0.16	6.24	1542	11.5	Composite			DM	409043	0.409	4837574	6.6846	0.004838	4.83757
484	39.1771	-107.752	4.34304e+06	780517	Leon Peak North	Vega	ES	Green River	9075	2766	8631	2631	444	135	2460	750	330	329	1	13	31	18	0.18	5.54	1727	12.53	Single			DM	104507	0.1045	870119	5.9396	0.00087	0.87012
485	39.1914	-107.752	4.3431e+06	776257	Leon Peak North	Vega	EF	Green River	8865	2702	8575	2614	290	88	1302	397	241	235	6	9	23	14	0.22	4.49	1741	11.78	Single			DM	9657	0.0097	43578	4.6393	4.4e-05	0.04358
486	39.1934	-107.801	4.34559e+06	776845	Leon Peak North	Vega	ES	Green River	8372	2552	7982	2433	390	119	2316	706	315	317	2	12	36	24	0.17	5.94	1508	11.43	Single			DM	77848	0.0778	600880	5.7788	0.000601	0.60088
487	39.2155	-107.793	4.34545e+06	776651	Leon Peak North	Vega	EF	Green River	8274	2522	7992	2436	282	86	1971	601	307	311	4	6	31	25	0.14	6.99	1325	12.21	Complex			DM	22660	0.0227	127332	5.1049	0.000127	0.12733
488	39.2142	-107.796	4.33982e+06	775408	Leon Peak North	The Flat Tops	EF	Green River	9529	2904	9039	2755	490	149	1719	524	71	55	16	18	24	6	0.29	3.51	1524	11.66	Single			DM	23454	0.0235	132967	5.1237	0.000133	0.13297
489	39.164	-107.812	4.33965e+06	775478	Leon Peak North	The Flat Tops	EF	Green River	9351	2850	9066	2763	285	87	823	251	89	91	2	16	23	7	0.35	2.89	1641	11.03	Single			DM	9208	0.0092	41044	4.6132	4.1e-05	0.04104
490	39.1625	-107.812	4.34023e+06	775252	Leon Peak North	The Flat Tops	EF	Green River	9811	2990	9095	2772	716	218	2460	750	100	92	8	12	19	7	0.29	3.44	1659	10.3	Single			DM	28188	0.0282	167542	5.2241	0.000168	0.16754
491	39.1678	-107.816	4.33807e+06	774948	Leon Peak North	The Flat Tops	EF	Goodenough	9830	2996	9299	2834	531	162	3431	1046	77	33	44	3	20	17	0.15	6.46	1558	11.77	Single			DM	119827	0.1198	1033403	6.0143	0.001033	1.0334
492	39.1491	-107.817	4.33798e+06	775332	Leon Peak North	The Flat Tops	DS	Goodenough	9785	2982	9460	2883	325	99	1250	381	42	61	19	12	20	8	0.26	3.85	1472	10.59	Single			DM	22012	0.022	122773	5.0891	0.000123	0.12277
493	39.1475	-107.814	4.33781e+06	775361	Leon Peak North	The Flat Tops	DS	Goodenough	9859	3005	9527	2904	332	101	1263	385	59	74	15	5	13	8	0.26	3.8	1604	10.97	Single			DM	23023	0.023	129903	5.1136	0.00013	0.1299
494	39.1459	-107.814	4.32411e+06	778599	Leon Peak South	Durkee Ridge	DS	Goodenough	10589	3228	10350	3155	239	73	2411	735	359	359	0	8	20	12	0.1	10.09	1651	10.21	Single			DM	98376	0.0984	806439	5.9066	0.000806	0.80644
495	39.0217	-107.782	4.32422e+06	778746	Leon Peak South	Durkee Ridge	DS	Goodenough	10564	3220	10307	3142	257	78	1873	571	343	340	3	6	28	22	0.14	7.29	1567	10.39	Single			DM	31397	0.0314	191865	5.283	0.000192	0.19187
496	39.0224	-107.78	4.32167e+06	778680	Leon Peak South	Durkee Ridge	EF	Wasatch	9904	3019	9755	2973	149	45	1102	336	318	332	14	5	21	16	0.14	7.4	1821	9.74	Successive			DM	95846	0.0958	780457	5.8923	0.00078	0.78046
497	38.9997	-107.782	4.32048e+06	762622	Leon Peak South	Hells Kitchen	EF	Green River	9232	2814	8656	2638	576	176	1961	598	199	235	36	25	30	5	0.29	3.41	1841	8.28	Single			DR	18144	0.0181	96291	4.9836	9.6e-05	0.09629
498	38.9951	-107.967	4.35021e+06	771317	Leon Peak North	Vega	EF	Wasatch	7562	2305	7035	2144	527	161	1525	465	14	23	9	17	32	15	0.35	2.89	1590	12.29	Single			DM	42128	0.0421	277665	5.4435	0.000278	0.27767
499	39.2588	-107.856	4.35024e+06	771167	Leon Peak North	Vega	DS	Wasatch	7486	2282	7015	2138	471	144	1050	320	4	18	14	16	43	27	0.45	2.23	1553	12.13	Single			DY	23913	0.0239	136247	5.1343	0.000136	0.13625
500	39.2592	-107.857	4.35025e+06	770975	Leon Peak North	Vega	RS	Wasatch	7392	2253	6889	2100	503	153	1512	461	350	350	0	12	39	27	0.33	3.01	1212	13.03	Complex			DY	19849	0.0198	107804	5.0326	0.000108	0.1078
501	39.2593	-107.859	4.34596e+06	768701	Leon Peak North	Vega	ES	Wasatch	7149	2179	6949	2118	200	61	725	221	26	26	0	16	20	4	0.28	3.62	1327	15.07	Single			DM	8164	0.0082	35281	4.5475	3.5e-05	0.03528
502	39.2214	-107.888	4.3433e+06	759173	Palisade North	Kansas Mesa	ES	Wasatch	6444	1964	6325	1928	119	36	761	232	276	264	12	4	13	9	0.16	6.39	1532	11.43	Single			DM	15012	0.015	75879	4.8801	7.6e-05	0.07588
503	39.2003	-107.999	4.34251e+06	759785	Palisade North	Kansas Mesa	ES	Wasatch	6641	2024	6590	2009	51	16	246	75	200	197	3	2	25	23	0.21	4.82	1666	14.56	Multiple			DM	35518	0.0355	224044	5.3503	0.000224	0.22404
504	39.1929	-107.992	4.34276e+06	759439	Palisade North	Kansas Mesa	ES	Wasatch	6590	2009	6496	1980	94	29	485	148	301	310	9	2	21	19	0.19	5.16	1479	14.15	Multiple			DM	37834	0.0378	242567	5.3848	0.000243	0.24257
505	39.1954	-107.996	4.34088e+06	759008	Palisade North	Mormon Mesa	ES	Wasatch	6813	2077	6713	2046	100	30	466	142	112	115	3	3	25	22	0.21	4.66	1547	13.13	Complex			DY	18661	0.0187	99753	4.9989	0.0001	0.09975
506	39.1786	-108.002	4.33917e+06	762493	Palisade North	Kansas Mesa	EF	Green River	7779	2371	7172	2186	607	185	2142	653	310	304	6	3	30	27	0.28	3.53	1383	12.38	Successive			DY	54452	0.0545	383376	5.5836	0.000383	0.38338
507	39.1617	-107.961	4.33893e+06	762523	Palisade North	Kansas Mesa	EF	Green River	7800	2377	7114	2168	686	209	2532	772	300	293	7	4	21	17	0.27	3.69	1413	12.11	Successive			DY	70662	0.0707	531999	5.7259	0.000532	0.532
508	39.16	-107.962	4.33822e+06	762469	Palisade North	Kansas Mesa	EF	Green River	7809	2380	7373	2247	436	133	1666	508	312	316	4	13	42	29	0.26	3.82	1357	12.63	Single			DY	29194	0.0292	175094	5.2433	0.000175	0.17509
509	39.1536	-107.963	4.33837e+06	762471	Palisade North	Kansas Mesa	EF	Green River	7808	2380	7261	2213	547	167	1899	579	275	268	7	2	32	30	0.29	3.47	1451	12.33	Multiple			DY	68957	0.069	515910	5.7126	0.000516	0.51591
510	39.155	-107.963	4.33613e+06	763987	Palisade North	Horse Mountain	ES	Green River	9500	2896	9037	2754	463	141	1922	586	48	49	1	6	8	2	0.24	4.15	1709	10.02	Single			DM	63397	0.0634	464165	5.6667	0.000464	0.46417
511	39.1343	-107.946	4.33618e+06	763832	Palisade North	Horse Mountain	EF	Green River	9505	2897	9128	2782	377	115	1555	474	31	42	11	8	24	16	0.24	4.12	1651	10.93	Single			DM	15873	0.0159	81393	4.9106	8.1e-05	0.08139
512	39.1342	-107.948	4.33668e+06	763567	Palisade North	Horse Mountain	EF	Green River	8919	2719	8596	2620	323	98	1073	327	16	2	14	20	31	11	0.3	3.32	1368	10.45	Single			DM	19623	0.0196	106263	5.0264	0.000106	0.10626
513	39.1395	-107.951	4.33572e+06	763673	Palisade North	Horse Mountain	EF	Green River	9581	2920	8904	2714	677	206	3998	1219	354	338	16	3	13	10	0.17	5.91	1640	10.84	Single			DM	135296	0.1353	1203828	6.0806	0.001204	1.20383
514	39.134	-107.95	4.33336e+06	769194	Leon Peak North	Horse Mountain	ES	Green River	10039	3060	9877	3011	162	49	958	292	65	78	13	9	24	15	0.17	5.91	1434	11.82	Single			DM	26562	0.0266	155485	5.1917	0.000155	0.15549
515	39.1078	-107.887	4.33396e+06	766973	Leon Peak North	Horse Mountain	ES	Green River	9703	2957	9182	2799	521	159	1899	579	32	47	15	4	17	13	0.27	3.65	1636	10.25	Successive			DM	119946	0.1199	1034699	6.0148	0.001035	1.0347
516	39.1139	-107.912	4.34974e+06	779938	Leon Peak North	Vega	ES	Wasatch	7894	2406	7757	2364	137	42	518	158	176	163	13	2	32	30	0.26	3.78	1732	13.26	Single			DY	6408	0.0064	26018	4.4153	2.6e-05	0.02602
517	39.2518	-107.756	4.34965e+06	779900	Leon Peak North	Vega	ES	Wasatch	7922	2415	7700	2347	222	68	863	263	122	111	11	5	21	16	0.26	3.89	1636	13.21	Complex			DY	10245	0.0102	46941	4.6716	4.7e-05	0.04694
518	39.251	-107.756	4.34852e+06	781538	Leon Peak North	Vega	ES	Wasatch	7913	2412	7710	2350	203	62	863	263	101	94	7	11	22	11	0.24	4.25	1495	13	Multiple			DY	25525	0.0255	147896	5.17	0.000148	0.1479
519	39.2404	-107.738	4.34865e+06	781511	Leon Peak North	Vega	ES	Wasatch	7906	2410	7761	2366	145	44	525	160	115	131	16	5	22	17	0.28	3.62	1659	13.72	Single			DY	4566	0.0046	16993	4.2303	1.7e-05	0.01699
520	39.2415	-107.738	4.3487e+06	781574	Leon Peak North	Vega	ES	Wasatch	7819	2383	7732	2357	87	27	335	102	108	105	3	22	25	3	0.26	3.85	1596	14.15	Single			DY	2152	0.0022	6601	3.8196	7e-06	0.0066
521	39.2419	-107.737	4.34878e+06	781548	Leon Peak North	Vega	ES	Wasatch	7915	2412	7754	2363	161	49	505	154	116	110	6	1	22	21	0.32	3.14	1626	12.8	Single			DY	5781	0.0058	22861	4.3591	2.3e-05	0.02286
522	39.2427	-107.738	4.34892e+06	781129	Leon Peak North	Vega	EF	Wasatch	7924	2415	7603	2317	321	98	1394	425	307	311	4	2	14	12	0.23	4.34	1542	12.87	Single			DY	37879	0.0379	242923	5.3855	0.000243	0.24292
523	39.2442	-107.743	4.34837e+06	781429	Leon Peak North	Vega	ES	Wasatch	7978	2432	7805	2379	173	53	544	166	90	100	10	5	22	17	0.32	3.15	1600	11.29	Single			DM	5492	0.0055	21436	4.3311	2.1e-05	0.02144
524	39.239	-107.739	4.34471e+06	782158	Leon Peak North	Vega	ES	Green River	8689	2648	8354	2546	335	102	1335	407	84	96	12	13	23	10	0.25	3.98	1541	12.62	Single			DM	34170	0.0342	213408	5.3292	0.000213	0.21341
525	39.2058	-107.732	4.34456e+06	781941	Leon Peak North	Vega	EF	Wasatch	9164	2793	8396	2559	768	234	2381	726	128	124	4	9	30	21	0.32	3.1	1775	12.79	Single			DY	58012	0.058	415147	5.6182	0.000415	0.41515
526	39.2046	-107.735	4.33917e+06	783380	Leon Peak North	The Flat Tops	EF	Green River	10645	3245	9937	3029	708	216	3408	1039	98	73	25	1	17	16	0.21	4.81	1790	11.61	Complex			DM	161026	0.161	1498375	6.1756	0.001498	1.49838
527	39.1556	-107.721	4.33791e+06	783956	Leon Peak North	The Flat Tops	EF	Green River	10578	3224	10142	3091	436	133	2132	650	49	64	15	2	13	11	0.2	4.89	1769	10.42	Single			DY	45494	0.0455	305841	5.4855	0.000306	0.30584
528	39.1441	-107.714	4.33817e+06	783862	Leon Peak North	The Flat Tops	EF	Green River	10579	3224	10117	3084	462	141	1673	510	41	27	14	3	5	2	0.28	3.62	1678	10.69	Single			DY	11716	0.0117	55564	4.7448	5.6e-05	0.05556
529	39.1468	-107.715	4.33596e+06	784351	Leon Peak North	The Flat Tops	EF	Green River	10640	3243	10001	3048	639	195	4126	1258	36	37	1	4	14	10	0.15	6.46	1655	11.7	Complex			DM	90267	0.0903	723775	5.8596	0.000724	0.72378
530	39.1267	-107.71	4.32556e+06	782573	Leon Peak South	Durkee Ridge	ES	Green River	10410	3173	10055	3065	355	108	1460	445	243	219	24	16	21	5	0.24	4.11	1840	10.65	Complex			DM	28435	0.0284	169394	5.2289	0.000169	0.16939
531	39.0334	-107.736	4.32523e+06	783388	Leon Peak South	Durkee Ridge	ES	Green River	10540	3213	10062	3067	478	146	2125	648	214	204	10	10	27	17	0.22	4.45	1924	9.31	Successive			DM	93861	0.0939	760191	5.8809	0.00076	0.76019
532	39.0302	-107.726	4.32757e+06	784314	Leon Peak South	Hubbard Park	ES	Green River	10543	3214	10193	3107	350	107	1456	444	209	213	4	7	24	17	0.24	4.16	1850	8.7	Single			DR	46429	0.0464	313765	5.4966	0.000314	0.31377
533	39.051	-107.715	4.32847e+06	783691	Leon Peak South	Hubbard Park	RS	Basalt	10996	3352	10354	3156	642	196	3615	1102	269	275	6	6	21	15	0.18	5.63	1851	11.47	Composite			DY	229015	0.229	2333092	6.3679	0.002333	2.33309
534	39.0593	-107.721	4.34821e+06	779727	Leon Peak South	Vega	DS	Green River	8355	2547	8005	2440	350	107	876	267	98	118	20	4	30	26	0.4	2.5	1490	12.3	Successive			DY	20322	0.0203	111044	5.0455	0.000111	0.11104
535	39.2381	-107.759	4.34778e+06	779797	Leon Peak South	Vega	DS	Green River	8197	2498	7893	2406	304	93	1384	422	165	110	55	16	27	11	0.22	4.55	1770	12.84	Successive			DY	94835	0.0948	770121	5.8866	0.00077	0.77012
536	39.2343	-107.758	4.35026e+06	776424	Leon Peak North	Vega	EF	Wasatch	7781	2372	7480	2280	301	92	1476	450	65	72	7	8	34	26	0.2	4.9	1354	12.38	Complex			DM	30680	0.0307	186373	5.2704	0.000186	0.18637
537	39.2576	-107.796	4.31936e+06	744303	Palisade South	Kannah Creek Basin	EF	Wasatch	9151	2789	8512	2594	639	195	3096	944	141	167	26	7	30	23	0.21	4.85	1832	12.26	Single			DM	106615	0.1066	892249	5.9505	0.000892	0.89225
538	38.9903	-108.179	4.31406e+06	746189	Palisade South	Kannah Creek Basin	RS	Green River	9644	2939	8545	2605	1099	335	13645	4160	306	309	3	2	34	32	0.08	12.42	1623	13.4	Multiple			DY	3724825	3.7248	77750987	7.8907	0.077751	77.751	Cheever Creek Slide
539	38.9409	-108.16	4.31572e+06	744872	Flowing Park Northwest	Kannah Creek Basin	RS-DS	Mesaverde	8615	2626	7476	2279	1139	347	7682	2342	291	308	17	8	20	12	0.15	6.74	1507	10.59	Composite			DM	1209755	1.2098	18909438	7.2767	0.018909	18.9094
540	38.9588	-108.174	4.3172e+06	745360	Flowing Park Northwest	Kannah Creek Basin	EF	Mesaverde	8392	2558	7631	2326	761	232	7059	2152	351	339	12	6	14	8	0.11	9.28	1496	11.46	Single			DY	257380	0.2574	2702012	6.4317	0.002702	2.70201
541	38.9668	-108.168	4.31923e+06	744928	Palisade South	Kannah Creek Basin	ES	Wasatch	8768	2672	8550	2606	218	66	699	213	142	144	2	6	23	17	0.31	3.2	1780	14.39	Single			DY	8338	0.0083	36233	4.5591	3.6e-05	0.03623
542	38.9878	-108.172	4.31973e+06	743259	Palisade South	Kannah Creek Basin	DS	Wasatch	8884	2708	8496	2590	388	118	1617	493	267	220	47	18	21	3	0.24	4.17	1748	12.65	Successive			DY	22118	0.0221	123517	5.0917	0.000124	0.12352
543	38.993	-108.191	4.34257e+06	758063	Palisade North	Mormon Mesa	ES	Wasatch	6645	2025	6521	1988	124	38	813	248	92	83	9	2	19	17	0.15	6.56	1533	13.15	Single			DY	12336	0.0123	59281	4.7729	5.9e-05	0.05928
544	39.1941	-108.012	4.31236e+06	725342	Palisade South	The Hunting Grounds	ES	Mancos	4900	1494	4822	1470	78	24	410	125	14	5	9	2	13	11	0.19	5.26	1413	14.13	Single			DY	16594	0.0166	86066	4.9348	8.6e-05	0.08607
545	38.9312	-108.4	4.3015e+06	761494	Flowing Park Southeast	Happy Hollow Gulch	EF	Mancos	5364	1635	5200	1585	164	50	872	266	273	275	2	4	6	2	0.19	5.32	1477	11.43	Single			DY	22273	0.0223	124606	5.0955	0.000125	0.12461
546	38.8235	-107.989	4.30143e+06	761320	Flowing Park Southeast	Happy Hollow Gulch	EF	Mancos	5360	1634	5202	1586	158	48	840	256	292	307	15	3	4	1	0.19	5.31	1465	11.42	Single			DY	15814	0.0158	81012	4.9085	8.1e-05	0.08101
547	38.8228	-107.989	4.3016e+06	761359	Flowing Park Southeast	Happy Hollow Gulch	EF	Mancos	5339	1627	5167	1575	172	52	932	284	298	287	11	7	10	3	0.18	5.42	1458	13.18	Single			DY	9614	0.0096	43333	4.6368	4.3e-05	0.04333
548	38.8245	-107.989	4.3012e+06	761307	Flowing Park Southeast	Happy Hollow Gulch	EF	Mancos	5337	1627	5143	1568	194	59	892	272	303	299	4	2	11	9	0.22	4.6	1441	12.83	Single			DY	12558	0.0126	60629	4.7827	6.1e-05	0.06063
549	38.8208	-107.99	4.30111e+06	761233	Flowing Park Southeast	Happy Hollow Gulch	ES	Mancos	5339	1627	5143	1568	196	60	754	230	301	302	1	3	20	17	0.26	3.85	1449	13.2	Successive			DY	25306	0.0253	146303	5.1653	0.000146	0.1463
550	38.82	-107.991	4.30255e+06	761477	Flowing Park Southeast	Happy Hollow Gulch	EF	Mancos	5400	1646	5189	1582	211	64	764	233	227	259	32	2	12	10	0.28	3.62	1528	11.69	Single			DY	16027	0.016	82388	4.9159	8.2e-05	0.08239
551	38.833	-107.988	4.30261e+06	761446	Flowing Park Southeast	Happy Hollow Gulch	EF	Mancos	5401	1646	5192	1583	209	64	735	224	298	301	3	17	23	6	0.28	3.52	1356	11.65	Single			DY	6385	0.0064	25906	4.4134	2.6e-05	0.02591
552	38.8335	-107.988	4.33223e+06	757297	Palisade North	Bull Basin	EF	Green River	9659	2944	8513	2595	1146	349	8971	2735	323	344	21	2	31	29	0.13	7.83	1555	11.95	Composite	Qefr		DY	439669	0.4397	5297230	6.724	0.005297	5.29723
553	39.1013	-108.025	4.33352e+06	758034	Palisade North	Bull Basin	ES	Green River	9528	2904	8132	2479	1396	426	8321	2537	335	340	5	9	22	13	0.17	5.96	1443	10.41	Composite	Qefi		DY	557675	0.5577	7142689	6.8539	0.007143	7.14269
554	39.1126	-108.016	4.33403e+06	757362	Palisade North	Bull Basin	EF	Green River	8845	2696	7714	2351	1131	345	5051	1540	9	4	5	12	25	13	0.22	4.47	1437	9.9	Successive	Qefi		DM	211801	0.2118	2114789	6.3253	0.002115	2.11479
555	39.1175	-108.023	4.33881e+06	771265	Leon Peak North	Horse Mountain	EF	Goodenough	9797	2986	9033	2753	764	233	3805	1160	308	299	9	5	6	1	0.2	4.98	1645	10.94	Single			DM	58488	0.0585	419441	5.6227	0.000419	0.41944
556	39.157	-107.862	4.3411e+06	773503	Leon Peak North	Vega	EF	Green River	8907	2715	8705	2653	202	62	715	218	74	85	11	11	14	3	0.28	3.54	1505	10.75	Single			DM	3558	0.0036	12419	4.0941	1.2e-05	0.01242
557	39.1761	-107.834	4.33404e+06	776616	Leon Peak North	The Flat Tops	ES	Goodenough	10062	3067	9899	3017	163	50	876	267	31	37	6	8	21	13	0.19	5.37	1580	10.56	Single			DR	10350	0.0103	47542	4.6771	4.8e-05	0.04754
558	39.1116	-107.801	4.30503e+06	748488	Flowing Park Southeast	Alkali Basin	EF	Mancos	8070	2460	6604	2013	1466	447	7882	2403	217	181	36	6	36	30	0.19	5.38	1790	7.76	Single			DR	755966	0.756	10470437	7.02	0.01047	10.4704
559	38.859	-108.136	4.30563e+06	749622	Flowing Park Southeast	Alkali Basin	EF	Mesaverde	8057	2456	7010	2137	1047	319	5520	1683	132	147	15	16	29	13	0.19	5.27	1690	7.46	Single			DR	394186	0.3942	4617720	6.6644	0.004618	4.61772
560	38.8641	-108.123	4.30531e+06	746571	Flowing Park Southeast	Alkali Basin	EF	Mesaverde	8465	2580	6587	2008	1878	572	14160	4317	154	181	27	5	15	10	0.13	7.54	1737	6.78	Successive			DR	2504648	2.5047	47208037	7.674	0.047208	47.208	Alakai Creek Slide
561	38.8621	-108.158	4.30566e+06	744581	Flowing Park Southeast	Alkali Basin	EF	Mesaverde	9037	2754	6288	1917	2749	838	18555	5657	189	207	18	18	37	19	0.15	6.75	1846	7.19	Multiple			DR	1242435	1.2424	19553861	7.2912	0.019554	19.5539
562	38.8658	-108.181	4.30742e+06	745615	Flowing Park Southeast	Alkali Basin	DS	Mesaverde	8933	2723	8553	2607	380	116	1151	351	127	121	6	8	24	16	0.33	3.03	1737	8.59	Single			DM	20152	0.0202	109873	5.0409	0.00011	0.10987
563	38.8814	-108.168	4.3084e+06	746489	Flowing Park Southeast	Alkali Basin	RS	Wasatch	9560	2914	8978	2736	582	177	4907	1496	148	152	4	2	19	17	0.12	8.43	1787	13.11	Successive			DY	173461	0.1735	1645262	6.2162	0.001645	1.64526
564	38.889	-108.158	4.30732e+06	746821	Flowing Park Southeast	Alkali Basin	DS	Mesaverde	9013	2747	8427	2569	586	179	4025	1227	161	145	16	3	19	16	0.15	6.87	1659	10.87	Multiple			DY	644463	0.6445	8567131	6.9328	0.008567	8.56713
565	38.8801	-108.155	4.30768e+06	747894	Flowing Park Southeast	Alkali Basin	EF	Mesaverde	9014	2747	8756	2669	258	79	886	270	241	247	6	17	26	9	0.29	3.43	1744	8.72	Single			DM	2864	0.0029	9452	3.9755	9e-06	0.00945
566	38.883	-108.142	4.30787e+06	749041	Flowing Park Southeast	Southeast Bench	ES	Mesaverde	8899	2712	8607	2623	292	89	971	296	128	97	31	21	24	3	0.3	3.32	1682	9.76	Single			DM	13906	0.0139	68919	4.8383	6.9e-05	0.06892
567	38.8846	-108.129	4.30958e+06	749104	Flowing Park Southeast	Southeast Bench	RS-DS	Wasatch	9505	2897	9160	2792	345	105	2768	844	167	149	18	9	42	33	0.12	8.02	1864	12.14	Successive			DY	102018	0.102	844151	5.9264	0.000844	0.84415
568	38.8993	-108.127	4.3106e+06	753726	Flowing Park Southeast	Southeast Bench	RS	Wasatch	8850	2697	7296	2224	1554	474	6426	1959	121	113	8	11	40	29	0.24	4.13	1721	7.84	Successive			DR	430198	0.4302	5154180	6.7122	0.005154	5.15418
569	38.9076	-108.074	4.3112e+06	754201	Flowing Park Southeast	Southeast Bench	DS	Wasatch	8535	2601	7001	2134	1534	468	5100	1555	100	107	7	14	38	24	0.3	3.32	1753	10.61	Complex			DM	383927	0.3839	4467136	6.65	0.004467	4.46714
570	38.9129	-108.068	4.31104e+06	755634	Flowing Park Southeast	Hells Kitchen	DS	Mesaverde	7329	2234	6749	2057	580	177	1561	476	168	190	22	14	33	19	0.37	2.69	1744	9.21	Single			DM	111695	0.1117	946018	5.9759	0.000946	0.94602
571	38.9111	-108.052	4.3128e+06	750304	Flowing Park Southeast	Hells Kitchen	RS	Goodenough	9908	3020	9523	2903	385	117	1096	334	169	152	17	12	19	7	0.35	2.85	1870	11.83	Multiple			DM	22292	0.0223	124741	5.096	0.000125	0.12474
572	38.9284	-108.112	4.31299e+06	750498	Flowing Park Southeast	Hells Kitchen	RS	Goodenough	9932	3027	9497	2895	435	133	1289	393	110	129	19	10	16	6	0.34	2.96	1789	11.32	Successive			DM	59937	0.0599	432546	5.636	0.000433	0.43255
573	38.9301	-108.11	4.31851e+06	755189	Flowing Park Southeast	Southeast Bench	DS	Green River	9616	2931	9323	2842	293	89	1394	425	175	169	6	17	24	7	0.21	4.76	1882	9.69	Single			DM	13812	0.0138	68334	4.8346	6.8e-05	0.06833
574	38.9784	-108.054	4.31868e+06	754762	Flowing Park Southeast	Southeast Bench	DS	Green River	9736	2968	9554	2912	182	55	1220	372	170	164	6	6	25	19	0.15	6.7	1870	11.74	Single			DM	16682	0.0167	86640	4.9377	8.7e-05	0.08664
575	38.9798	-108.059	4.32101e+06	762988	Flowing Park Southeast	Hells Kitchen	EF	Green River	9496	2894	8708	2654	788	240	3775	1151	164	173	9	3	14	11	0.21	4.79	1809	9.3	Successive			DM	81438	0.0814	635923	5.8034	0.000636	0.63592
576	38.9986	-107.963	4.32066e+06	762395	Flowing Park Southeast	Hells Kitchen	ES	Green River	9185	2800	8698	2651	487	148	1269	387	171	179	8	15	35	20	0.38	2.61	1863	9.97	Composite			DM	26957	0.027	158397	5.1997	0.000158	0.1584
577	38.9957	-107.97	4.32085e+06	762680	Flowing Park Southeast	Hells Kitchen	ES	Green River	9191	2801	8970	2734	221	67	443	135	205	212	7	15	28	13	0.5	2	1832	7.84	Single			DR	2908	0.0029	9637	3.9839	1e-05	0.00964
578	38.9973	-107.967	4.3224e+06	764302	Flowing Park Southeast	Hells Kitchen	EF	Green River	9569	2917	9325	2842	244	74	613	187	132	134	2	14	16	2	0.4	2.51	1748	7.85	Single			DR	6374	0.0064	25846	4.4124	2.6e-05	0.02585
579	39.0107	-107.947	4.32197e+06	764281	Flowing Park Southeast	Hells Kitchen	EF	Green River	9556	2913	8877	2706	679	207	1696	517	152	145	7	17	21	4	0.4	2.5	1848	6.33	Complex			DR	49367	0.0494	338918	5.5301	0.000339	0.33892
580	39.0069	-107.948	4.32179e+06	764095	Flowing Park Southeast	Hells Kitchen	EF	Green River	9470	2886	8800	2682	670	204	2230	680	122	126	4	16	21	5	0.3	3.33	1837	7.15	Complex			DR	75222	0.0752	575510	5.7601	0.000576	0.57551
581	39.0053	-107.95	4.32217e+06	764191	Flowing Park Southeast	Hells Kitchen	ES	Green River	9555	2912	9241	2817	314	96	823	251	134	173	39	17	21	4	0.38	2.62	1835	9.29	Single			DM	11284	0.0113	52999	4.7243	5.3e-05	0.053
582	39.0087	-107.949	4.32227e+06	764306	Flowing Park Southeast	Hells Kitchen	ES	Green River	9522	2902	9086	2769	436	133	1089	332	159	146	13	15	21	6	0.4	2.5	1823	7.96	Multiple			DR	25410	0.0254	147058	5.1675	0.000147	0.14706
583	39.0092	-107.947	4.32351e+06	770955	Leon Peak South	Happy Hollow Gulch	EF	Green River	9884	3013	8998	2743	886	270	3300	1006	179	141	38	9	18	9	0.27	3.72	1848	7.84	Multiple			DR	112333	0.1123	952821	5.979	0.000953	0.95282
584	39.0187	-107.87	4.32288e+06	770029	Leon Peak South	Happy Hollow Gulch	EF	Green River	9862	3006	9383	2860	479	146	2296	700	183	184	1	2	11	9	0.21	4.79	1761	10.74	Multiple			DM	69862	0.0699	524431	5.7197	0.000524	0.52443
585	39.0143	-107.882	4.32378e+06	771101	Leon Peak South	Happy Hollow Gulch	EF	Green River	9946	3032	9100	2774	846	258	3073	937	127	128	1	6	16	10	0.28	3.63	1812	6.91	Successive			DR	66248	0.0662	490554	5.6907	0.000491	0.49055
586	39.0211	-107.869	4.33349e+06	760566	Palisade North	Bull Basin	EF	Green River	9422	2872	8148	2484	1274	388	5241	1598	12	15	3	3	22	19	0.24	4.11	1778	10.12	Successive			DM	427977	0.428	5120749	6.7093	0.005121	5.12075
587	39.1134	-107.987	4.32976e+06	790635	Leon Peak South	Hubbard Park	ES	Green River	10341	3152	9575	2918	766	233	11093	3382	55	65	10	3	15	12	0.07	14.48	1684	8.61	Composite			DM	1625840	1.6258	27420690	7.4381	0.027421	27.4207
588	39.0686	-107.641	4.3279e+06	792357	Leon Peak South	Hubbard Park	EF	Green River	10621	3237	8871	2704	1750	533	23724	7233	70	58	12	4	24	20	0.07	13.56	1460	9.22	Composite			DM	6389084	6.3891	153217706	8.1853	0.153218	153.218	Hubbard Creek Slide
589	39.0513	-107.622	4.32533e+06	790432	Leon Peak South	Hubbard Park	ES	Green River	10692	3259	10370	3161	322	98	4041	1232	149	132	17	1	18	17	0.08	12.55	1553	8.96	Complex			DR	171312	0.1713	1619682	6.2094	0.00162	1.61968
590	39.0288	-107.645	4.32558e+06	791419	Leon Peak South	Hubbard Park	ES	Green River	10643	3244	10133	3089	510	155	2703	824	172	176	4	4	33	29	0.19	5.3	1951	9.27	Single			DY	482019	0.482	5946485	6.7743	0.005946	5.94649
591	39.0307	-107.634	4.32296e+06	788679	Leon Peak South	Duke Basin	ES	Green River	10656	3248	10097	3078	559	170	4815	1468	154	167	13	1	39	38	0.12	8.61	1961	7.85	Single			DR	806960	0.807	11365956	7.0556	0.011366	11.366
592	39.008	-107.666	4.3234e+06	789148	Leon Peak South	Duke Basin	ES	Green River	10702	3262	10395	3168	307	94	1456	444	199	207	8	4	14	10	0.21	4.74	1839	11.03	Single			DM	132724	0.1327	1175123	6.0701	0.001175	1.17512
593	39.0118	-107.661	4.32444e+06	788489	Leon Peak South	Duke Basin	DS	Green River	11122	3390	10185	3104	937	286	6685	2038	233	273	40	8	31	23	0.14	7.13	1896	10.41	Complex			DM	1249727	1.2497	19698239	7.2944	0.019698	19.6982
594	39.0214	-107.668	4.32563e+06	786960	Leon Peak South	Duke Basin	DS	Green River	10857	3309	9691	2954	1166	355	13573	4138	262	251	11	7	28	21	0.09	11.64	1519	8.41	Composite			DR	4853738	4.8537	108454284	8.0352	0.108454	108.454	Crater Peak Slide
595	39.0327	-107.685	4.32804e+06	784764	Leon Peak South	Hubbard Park	DS	Green River	10952	3338	10497	3199	455	139	3539	1079	140	163	23	10	24	14	0.13	7.78	1851	11.2	Multiple			DM	71785	0.0718	542644	5.7345	0.000543	0.54264
596	39.055	-107.709	4.31492e+06	743083	Flowing Park Northwest	Kannah Creek Basin	EF	Mesaverde	8495	2589	6250	1905	2245	684	14622	4458	347	349	2	3	21	18	0.15	6.51	1430	10.6	Successive			DR	1204264	1.2043	18801608	7.2742	0.018802	18.8016
597	38.9535	-108.2	4.309e+06	768632	Leon Peak South	Cedar Mesa	ES	Mancos	6423	1958	6077	1852	346	105	951	290	234	254	20	16	22	6	0.36	2.75	1541	10.49	Single			DY	26073	0.0261	151894	5.1815	0.000152	0.15189
598	38.889	-107.903	4.30885e+06	768663	Leon Peak South	Cedar Mesa	ES	Mancos	6371	1942	6193	1888	178	54	741	226	247	246	1	8	23	15	0.24	4.16	1598	11.18	Single			DY	14509	0.0145	72697	4.8615	7.3e-05	0.0727
599	38.8875	-107.903	4.30539e+06	770477	Leon Peak South	Cedar Mesa	ES	Mancos	5954	1815	5824	1775	130	40	561	171	143	139	4	12	24	12	0.23	4.31	1591	9.05	Single			DM	7685	0.0077	32698	4.5145	3.3e-05	0.0327
600	38.8558	-107.883	4.33145e+06	789012	Leon Peak North	Hubbard Park	EF	Green River	10305	3141	9875	3010	430	131	5169	1576	158	148	10	7	26	19	0.08	12.02	1850	8.03	Single			DR	523515	0.5235	6597037	6.8193	0.006597	6.59704
601	39.0843	-107.659	4.33754e+06	785729	Leon Peak North	The Flat Tops	RS	Green River	10534	3211	10108	3081	426	130	2713	827	313	298	15	3	13	10	0.16	6.37	1732	13.01	Composite			DY	102222	0.1022	846272	5.9275	0.000846	0.84627
602	39.1396	-107.695	4.33841e+06	785128	Leon Peak North	The Flat Tops	EF	Green River	10498	3200	9768	2977	730	223	5022	1531	83	249	194	2	14	12	0.15	6.88	1738	11.02	Composite			DM	375367	0.3754	4342281	6.6377	0.004342	4.34228
603	39.1482	-107.701	4.33892e+06	784960	Leon Peak North	The Flat Tops	ES	Green River	10470	3191	9730	2966	740	226	3136	956	29	255	134	5	21	16	0.24	4.24	1716	10.73	Composite			DM	416433	0.4164	4947704	6.6944	0.004948	4.9477
604	39.1529	-107.702	4.33831e+06	786972	Leon Peak North	The Flat Tops	EF	Green River	10335	3150	9643	2939	692	211	3421	1043	272	67	155	7	33	26	0.2	4.94	1703	10.5	Successive			DM	211142	0.2111	2106532	6.3236	0.002107	2.10653
605	39.1467	-107.679	4.31222e+06	743654	Flowing Park Northwest	Indian Point	DS	Wasatch	9567	2916	8941	2725	626	191	5789	1765	329	321	8	5	24	19	0.11	9.25	1725	11.8	Successive			DM	335487	0.3355	3770425	6.5764	0.00377	3.77043
606	38.9253	-108.19	4.3219e+06	765799	Flowing Park Southeast	Hells Kitchen	EF	Wasatch	9306	2836	8745	2665	561	171	1765	538	182	157	25	18	39	21	0.32	3.15	1850	8.1	Composite			DR	51965	0.052	361498	5.5581	0.000361	0.3615
607	39.0067	-107.931	4.32094e+06	763441	Flowing Park Southeast	Hells Kitchen	EF	Green River	9462	2884	8743	2665	719	219	3221	982	130	143	13	5	11	6	0.22	4.48	1783	9.47	Composite			DM	225168	0.2252	2283930	6.3587	0.002284	2.28393
608	38.9978	-107.958	4.32193e+06	763464	Flowing Park Southeast	Hells Kitchen	RS-DS	Green River	9612	2930	8998	2743	614	187	2522	769	199	149	50	10	22	12	0.24	4.11	1797	10.16	Composite			DM	85632	0.0856	677368	5.8308	0.000677	0.67737
609	39.0051	-107.956	4.34977e+06	779088	Leon Peak North	Vega	EF	Green River	8167	2489	7682	2341	485	148	2611	796	329	334	5	4	31	27	0.19	5.38	1387	12.62	Single			DY	63562	0.0636	465680	5.6681	0.000466	0.46568
610	39.2524	-107.766	4.35019e+06	779210	Leon Peak North	Vega	ES	Wasatch	7887	2404	7646	2331	241	73	827	252	350	115	125	2	30	28	0.29	3.43	1616	12.84	Successive			DY	28896	0.0289	172852	5.2377	0.000173	0.17285
611	39.2561	-107.764	4.35015e+06	780432	Leon Peak North	Vega	ES	Wasatch	7846	2391	7678	2340	168	51	623	190	302	131	189	18	32	14	0.27	3.71	1738	12.52	Single			DY	9788	0.0098	44324	4.6466	4.4e-05	0.04432
612	39.2554	-107.75	4.34947e+06	772888	Leon Peak North	Vega	RS	Wasatch	7650	2332	7298	2224	352	107	925	282	270	252	18	10	18	8	0.38	2.63	1627	12.85	Single			DY	30194	0.0302	182668	5.2617	0.000183	0.18267
613	39.2517	-107.838	4.34978e+06	772758	Leon Peak North	Vega	RS	Wasatch	7654	2333	7273	2217	381	116	1197	365	241	259	18	3	15	12	0.32	3.14	1649	13.15	Single			DY	19747	0.0197	107109	5.0298	0.000107	0.10711
614	39.2544	-107.839	4.35023e+06	773792	Leon Peak North	Vega	EF	Wasatch	8046	2452	7337	2236	709	216	2965	904	327	330	3	6	41	35	0.24	4.18	1111	12.5	Complex			DY	89754	0.0898	718608	5.8565	0.000719	0.71861
615	39.2582	-107.827	4.35064e+06	774153	Leon Peak North	Vega	EF	Wasatch	7776	2370	7192	2192	584	178	2365	721	1	359	2	12	37	25	0.25	4.05	1021	12.79	Complex			DY	81522	0.0815	636744	5.804	0.000637	0.63674
616	39.2617	-107.823	4.35004e+06	776695	Leon Peak North	Vega	ES	Wasatch	7767	2367	7516	2291	251	77	984	300	49	70	21	9	39	30	0.26	3.92	1358	12.38	Successive			DM	35760	0.0358	225963	5.354	0.000226	0.22596
617	39.2554	-107.793	4.35055e+06	777743	Leon Peak North	Vega	ES	Wasatch	7868	2398	7352	2241	516	157	2116	645	297	330	33	7	34	27	0.24	4.1	1245	13.67	Successive			DY	102864	0.1029	852960	5.9309	0.000853	0.85296
618	39.2599	-107.781	4.35073e+06	778386	Leon Peak North	Vega	EF	Wasatch	7747	2361	7303	2226	444	135	2401	732	25	16	9	7	32	25	0.18	5.41	1092	12.95	Complex			DY	71001	0.071	535204	5.7285	0.000535	0.5352
619	39.2614	-107.774	4.35077e+06	778149	Leon Peak North	Vega	ES	Wasatch	7786	2373	7354	2241	432	132	1342	409	22	43	21	10	36	26	0.32	3.11	1019	12.41	Complex			DY	47470	0.0475	322634	5.5087	0.000323	0.32263
620	39.2615	-107.776	4.35141e+06	779154	Leon Peak North	Vega	ES	Wasatch	7565	2306	7272	2217	293	89	1040	317	332	347	15	3	38	35	0.28	3.55	1332	12.53	Single			DY	38924	0.0389	251383	5.4003	0.000251	0.25138
621	39.2674	-107.764	4.34899e+06	779127	Leon Peak North	Vega	ES	Green River	8320	2536	7917	2413	403	123	1627	496	305	16	71	16	36	20	0.25	4.04	1545	13.3	Single			DY	41314	0.0413	270940	5.4329	0.000271	0.27094
622	39.2453	-107.766	4.34881e+06	779243	Leon Peak North	Vega	ES	Green River	8365	2550	7891	2405	474	144	1492	455	298	92	154	6	31	25	0.32	3.15	1589	13.34	Successive			DY	56329	0.0563	400069	5.6021	0.0004	0.40007
623	39.2437	-107.764	4.3486e+06	779192	Leon Peak North	Vega	ES	Green River	8393	2558	7985	2434	408	124	1210	369	308	75	127	20	31	11	0.34	2.97	1460	12.39	Single			DY	26493	0.0265	154977	5.1903	0.000155	0.15498
624	39.2418	-107.765	4.34836e+06	778192	Leon Peak North	Vega	EF	Green River	8312	2533	7740	2359	572	174	2591	790	13	355	18	3	40	37	0.22	4.53	1808	12.93	Complex			DY	131933	0.1319	1166328	6.0668	0.001166	1.16633
625	39.24	-107.777	4.3486e+06	778597	Leon Peak North	Vega	ES	Green River	8255	2516	7790	2374	465	142	2096	639	351	331	20	6	48	42	0.22	4.51	1762	13.39	Composite			DY	138905	0.1389	1244333	6.0949	0.001244	1.24433
626	39.242	-107.772	4.34815e+06	777855	Leon Peak North	Vega	ES	Green River	8113	2473	7834	2388	279	85	1460	445	325	297	28	17	38	21	0.19	5.23	1240	12.01	Single			DY	26023	0.026	151533	5.1805	0.000152	0.15153
627	39.2382	-107.781	4.34827e+06	776997	Leon Peak North	Vega	EF	Green River	8219	2505	7647	2331	572	174	2201	671	72	55	17	8	37	29	0.26	3.85	1729	14.08	Complex			DY	64666	0.0647	475880	5.6775	0.000476	0.47588
628	39.2396	-107.791	4.34801e+06	777573	Leon Peak North	Vega	EF	Wasatch	8088	2465	7648	2331	440	134	2545	776	56	31	25	3	27	24	0.17	5.78	1632	13.45	Composite			DM	49116	0.0491	336757	5.5273	0.000337	0.33676
629	39.2385	-107.784	4.34875e+06	776740	Leon Peak North	Vega	EF	Wasatch	8041	2451	7666	2337	375	114	1538	469	118	113	5	10	29	19	0.24	4.1	1647	12.51	Composite			DY	30817	0.0308	187422	5.2728	0.000187	0.18742
630	39.2439	-107.793	4.34919e+06	776771	Leon Peak North	Vega	ES	Wasatch	7855	2394	7577	2309	278	85	954	291	4	358	6	16	34	18	0.29	3.43	1284	13.24	Complex			DY	16796	0.0168	87388	4.9415	8.7e-05	0.08739
631	39.2479	-107.793	4.34722e+06	774976	Leon Peak North	Vega	EF	Wasatch	8079	2462	7910	2411	169	52	640	195	251	249	2	30	35	5	0.26	3.78	1663	12.5	Single			DY	6934	0.0069	28733	4.4584	2.9e-05	0.02873
632	39.2308	-107.814	4.34744e+06	774739	Leon Peak North	Vega	EF	Wasatch	8140	2481	7886	2404	254	77	905	276	249	256	7	25	31	6	0.28	3.56	1640	13.5	Single			DY	10358	0.0104	47589	4.6775	4.8e-05	0.04759
633	39.233	-107.817	4.34825e+06	776437	Leon Peak North	Vega	EF	Green River	8221	2506	7939	2420	282	86	1066	325	298	290	8	16	22	6	0.26	3.78	1487	14.28	Single			DY	14199	0.0142	70751	4.8497	7.1e-05	0.07075
634	39.2394	-107.796	4.34791e+06	776077	Leon Peak North	Vega	EF	Green River	8338	2541	7805	2379	533	162	2355	718	49	40	9	18	36	18	0.23	4.42	1271	12.09	Complex			DY	26423	0.0264	154462	5.1888	0.000154	0.15446
635	39.237	-107.801	4.34139e+06	782149	Leon Peak North	The Flat Tops	ES	Green River	9997	3047	9373	2857	624	190	4008	1222	359	12	13	14	29	15	0.16	6.42	1545	10.78	Successive			DM	206803	0.2068	2052241	6.3122	0.002052	2.05224
636	39.176	-107.734	4.34072e+06	782123	Leon Peak North	The Flat Tops	ES	Green River	10143	3092	9935	3028	208	63	1296	395	62	75	13	5	26	21	0.16	6.23	1522	12.69	Single			DM	30968	0.031	188580	5.2755	0.000189	0.18858
637	39.17	-107.734	4.32792e+06	749384	Palisade North	West Bench	RS-EF	Green River	9460	2883	7925	2416	1535	468	8400	2561	2	360	2	3	30	27	0.18	5.47	1520	10.48	Complex	Qefr		DY	567010	0.567	7293331	6.8629	0.007293	7.29333
638	39.0675	-108.12	4.32865e+06	751791	Palisade North	West Bench	RS-EF	Goodenough	9795	2986	8117	2474	1678	511	11250	3430	339	336	3	3	21	18	0.15	6.7	1686	11.43	Successive			DY	1269015	1.269	20081209	7.3028	0.020081	20.0812
639	39.0743	-108.094	4.31774e+06	759179	Flowing Park Southeast	Southeast Bench	ES	Wasatch	8552	2607	8164	2488	388	118	3638	1109	145	162	17	6	11	5	0.11	9.38	1753	9.75	Single	Qefi		DM	345057	0.3451	3906145	6.5917	0.003906	3.90615
640	38.9703	-108.008	4.31959e+06	758151	Flowing Park Southeast	Southeast Bench	DS	Goodenough	9627	2934	8653	2637	974	297	6055	1846	183	151	32	4	19	15	0.16	6.22	1785	12.47	Successive	Qefr		DY	145507	0.1455	1319134	6.1203	0.001319	1.31913
641	38.9836	-108.018	4.31668e+06	759024	Flowing Park Southeast	Southeast Bench	EF	Wasatch	8182	2494	7029	2142	1153	351	7003	2135	190	160	30	4	13	9	0.16	6.07	1726	8.3	Single			DR	583445	0.5834	7560087	6.8785	0.00756	7.56009
642	38.9608	-108.011	4.31869e+06	757227	Flowing Park Southeast	Southeast Bench	DS	Green River	9674	2949	8962	2732	712	217	3024	922	340	333	7	11	26	15	0.24	4.25	1888	9.64	Single	Qefi		DM	122305	0.1223	1060344	6.0254	0.00106	1.06034
643	38.9794	-108.031	4.31868e+06	758187	Flowing Park Southeast	Southeast Bench	DS	Goodenough	9801	2987	8270	2521	1531	467	10198	3109	162	151	11	1	20	19	0.15	6.66	1688	10.56	Composite	Qefi		DM	1114116	1.1141	17049540	7.2317	0.01705	17.0495
644	38.9791	-108.02	4.31607e+06	758233	Flowing Park Southeast	Southeast Bench	DS	Green River	8738	2663	6706	2044	2032	619	16882	5147	193	174	19	9	13	4	0.12	8.31	1793	7.41	Successive	Qefi		DR	4608032	4.608	101597539	8.0069	0.101598	101.598	Grandby Ditch Slide
645	38.9556	-108.02	4.31536e+06	759708	Flowing Park Southeast	Southeast Bench	EF	Mesaverde	7245	2208	6708	2045	537	164	3355	1023	203	182	21	15	21	6	0.16	6.25	1744	7.37	Single			DR	137865	0.1379	1232627	6.0908	0.001233	1.23263
646	38.9487	-108.003	4.31227e+06	750839	Flowing Park Southeast	Hells Kitchen	DS	Wasatch	9486	2891	9098	2773	388	118	3113	949	127	131	4	15	23	8	0.12	8.02	1785	9.42	Successive			DR	395890	0.3959	4642823	6.6668	0.004643	4.64282
647	38.9235	-108.107	4.31144e+06	749802	Flowing Park Southeast	Hells Kitchen	RS	Wasatch	9680	2950	9503	2897	177	54	872	266	104	122	18	12	24	12	0.2	4.93	1754	12.46	Single			DY	21015	0.021	115821	5.0638	0.000116	0.11582
648	38.9164	-108.119	4.31153e+06	749916	Flowing Park Southeast	Hells Kitchen	RS	Wasatch	9638	2938	9419	2871	219	67	1266	386	115	134	19	11	23	12	0.17	5.78	1799	12.16	Single			DY	22154	0.0222	123772	5.0926	0.000124	0.12377
649	38.9171	-108.117	4.31164e+06	750127	Flowing Park Southeast	Hells Kitchen	RS	Wasatch	9700	2957	9342	2847	358	109	2673	815	153	134	19	5	24	19	0.13	7.47	1824	11.81	Complex			DY	57263	0.0573	408427	5.6111	0.000408	0.40843
650	38.918	-108.115	4.31148e+06	750211	Flowing Park Southeast	Hells Kitchen	DS	Wasatch	9478	2889	9327	2843	151	46	1509	460	131	156	25	2	5	3	0.1	9.99	1704	9.45	Single			DM	52951	0.053	370139	5.5684	0.00037	0.37014
651	38.9166	-108.114	4.31191e+06	750154	Flowing Park Southeast	Hells Kitchen	DS	Wasatch	9806	2989	9391	2862	415	126	2578	786	122	120	2	5	25	20	0.16	6.21	1746	12.06	Complex			DY	118363	0.1184	1017557	6.0076	0.001018	1.01756
652	38.9205	-108.115	4.31224e+06	750365	Flowing Park Southeast	Hells Kitchen	DS	Wasatch	9658	2944	9370	2856	288	88	1919	585	127	145	18	9	32	23	0.15	6.66	1828	10.53	Complex			DR	101398	0.1014	837709	5.9231	0.000838	0.83771
653	38.9234	-108.112	4.31126e+06	749779	Flowing Park Southeast	Hells Kitchen	RS	Wasatch	9768	2977	9436	2876	332	101	1489	454	112	113	1	10	18	8	0.22	4.49	1758	12.07	Successive			DY	38789	0.0388	250287	5.3984	0.00025	0.25029
654	38.9149	-108.12	4.31112e+06	749597	Flowing Park Southeast	Hells Kitchen	RS	Wasatch	9729	2965	9532	2905	197	60	1279	390	110	89	21	5	26	21	0.15	6.49	1727	11.92	Successive			DM	13023	0.013	63463	4.8025	6.3e-05	0.06346
655	38.9135	-108.121	4.31045e+06	750693	Flowing Park Southeast	Southeast Bench	DS	Wasatch	9386	2861	8969	2734	417	127	3821	1165	87	108	21	3	11	8	0.11	9.16	1713	11.63	Successive	Qefi		DM	245182	0.2452	2542012	6.4052	0.002542	2.54201
656	38.9072	-108.109	4.30946e+06	750114	Flowing Park Southeast	Southeast Bench	DS	Wasatch	9184	2799	9013	2747	171	52	925	282	173	169	4	11	25	14	0.18	5.41	1838	13.16	Single	Qefr		DY	26865	0.0269	157719	5.1979	0.000158	0.15772
657	38.8984	-108.116	4.30941e+06	749970	Flowing Park Southeast	Southeast Bench	DS	Wasatch	9163	2793	9030	2752	133	41	1253	382	186	171	15	12	24	12	0.11	9.42	1822	12.69	Single	Qefi		DM	39232	0.0392	253888	5.4046	0.000254	0.25389
658	38.8981	-108.118	4.30945e+06	749703	Flowing Park Southeast	Southeast Bench	DS	Wasatch	9386	2861	9074	2766	312	95	1528	466	181	193	12	9	22	13	0.2	4.9	1807	11.98	Successive	Qefr		DM	48578	0.0486	332128	5.5213	0.000332	0.33213
659	38.8985	-108.121	4.30937e+06	749632	Flowing Park Southeast	Southeast Bench	DS	Wasatch	9300	2835	9088	2770	212	65	833	254	170	178	8	12	17	5	0.25	3.93	1846	11.73	Single	Qefi		DM	6667	0.0067	27351	4.437	2.7e-05	0.02735
660	38.898	-108.121	4.30959e+06	749970	Flowing Park Southeast	Southeast Bench	DS	Wasatch	9344	2848	9099	2773	245	75	1351	412	137	175	38	9	27	18	0.18	5.52	1807	11.58	Successive	Qefi		DM	51813	0.0518	360169	5.5565	0.00036	0.36017
661	38.8996	-108.118	4.30942e+06	749503	Flowing Park Southeast	Southeast Bench	DS	Wasatch	9378	2858	9138	2785	240	73	1364	416	206	229	23	6	21	15	0.18	5.69	1797	10.67	Successive	Qefi		DM	28962	0.029	173346	5.2389	0.000173	0.17335
662	38.8982	-108.123	4.30978e+06	750412	Flowing Park Southeast	Southeast Bench	DS	Wasatch	9294	2833	9032	2753	262	80	1902	580	114	87	27	5	18	13	0.14	7.26	1678	11.73	Composite	Qefr		DY	138504	0.1385	1239823	6.0934	0.00124	1.23982
663	38.9012	-108.112	4.30998e+06	749626	Flowing Park Southeast	Southeast Bench	DS	Wasatch	9586	2922	9374	2857	212	65	1092	333	167	148	19	4	22	18	0.19	5.15	1783	12.12	Single	Qefi		DM	44450	0.0444	297037	5.4728	0.000297	0.29704
664	38.9032	-108.121	4.30988e+06	749510	Flowing Park Southeast	Southeast Bench	DS	Wasatch	9521	2902	9403	2866	118	36	574	175	124	134	10	11	11	0	0.21	4.86	1808	11.03	Single			DM	6767	0.0068	27869	4.4451	2.8e-05	0.02787
665	38.9024	-108.123	4.30981e+06	749419	Flowing Park Southeast	Southeast Bench	RS-DS	Wasatch	9598	2925	9375	2858	223	68	1348	411	187	176	11	9	11	2	0.17	6.05	1825	12.6	Multiple			DM	28815	0.0288	172244	5.2361	0.000172	0.17224
666	38.9018	-108.124	4.30977e+06	749211	Flowing Park Southeast	Southeast Bench	RS	Wasatch	9649	2941	9369	2856	280	85	2217	676	180	174	6	3	17	14	0.13	7.92	1758	11.19	Successive			DM	72590	0.0726	550305	5.7406	0.00055	0.55031
667	38.9015	-108.126	4.30895e+06	749726	Flowing Park Southeast	Southeast Bench	DS	Wasatch	9074	2766	8537	2602	537	164	2132	650	134	174	40	5	14	9	0.25	3.97	1807	9.48	Single	Qefr		DM	70510	0.0705	530556	5.7247	0.000531	0.53056
668	38.8935	-108.12	4.30849e+06	750081	Flowing Park Southeast	Southeast Bench	DS	Mesaverde	8686	2647	8127	2477	559	170	5487	1673	161	146	15	18	20	2	0.1	9.82	1831	7.86	Single	Qefi		DR	114053	0.1141	971197	5.9873	0.000971	0.9712
669	38.8897	-108.117	4.30906e+06	750098	Flowing Park Southeast	Southeast Bench	ES	Wasatch	9007	2745	8756	2669	251	77	725	221	188	156	32	5	10	5	0.35	2.89	1750	9.36	Single			DY	10577	0.0106	48856	4.6889	4.9e-05	0.04886
670	38.8948	-108.116	4.30877e+06	749650	Flowing Park Southeast	Southeast Bench	ES	Mesaverde	9029	2752	8695	2650	334	102	895	273	116	128	12	8	15	7	0.37	2.68	1748	6.28	Single	Qefr		DM	7830	0.0078	33475	4.5247	3.3e-05	0.03348
671	38.8924	-108.122	4.30891e+06	749416	Flowing Park Southeast	Southeast Bench	ES	Wasatch	9125	2781	8911	2716	214	65	1670	509	158	159	1	2	3	1	0.13	7.8	1706	9.62	Single	Qefi		DM	57351	0.0574	409217	5.612	0.000409	0.40922
672	38.8936	-108.124	4.30862e+06	749532	Flowing Park Southeast	Southeast Bench	ES	Mesaverde	8972	2735	8462	2579	510	155	2080	634	208	174	34	10	14	4	0.25	4.08	1777	8.81	Single			DR	52294	0.0523	364371	5.5615	0.000364	0.36437
673	38.8907	-108.123	4.30821e+06	749718	Flowing Park Southeast	Southeast Bench	ES	Mesaverde	8558	2608	8193	2497	365	111	1463	446	146	98	48	25	32	7	0.25	4.01	1716	10.72	Single			DM	32052	0.0321	196909	5.2943	0.000197	0.19691
674	38.8873	-108.121	4.30748e+06	752833	Flowing Park Southeast	Hells Kitchen	ES	Mancos	6817	2078	6695	2041	122	37	397	121	226	222	4	4	27	23	0.31	3.25	1675	10.12	Single			DM	7152	0.0072	29872	4.4753	3e-05	0.02987
675	38.8798	-108.085	4.30926e+06	754411	Flowing Park Southeast	Hells Kitchen	RS	Mesaverde	6937	2114	6733	2052	204	62	853	260	29	54	25	23	37	14	0.24	4.18	1444	14.56	Single			DY	24505	0.0245	140506	5.1477	0.000141	0.14051
676	38.8954	-108.067	4.30904e+06	753992	Flowing Park Southeast	Hells Kitchen	DS	Mesaverde	7411	2259	7123	2171	288	88	1351	412	166	161	5	11	26	15	0.21	4.69	1672	11.8	Single			DY	19637	0.0196	106356	5.0268	0.000106	0.10636
677	38.8935	-108.071	4.30896e+06	754048	Flowing Park Southeast	Hells Kitchen	DS	Mesaverde	7372	2247	6903	2104	469	143	1483	452	42	62	20	2	21	19	0.32	3.16	1436	9.65	Complex			DM	12521	0.0125	60401	4.781	6e-05	0.0604
678	38.8929	-108.07	4.30888e+06	754095	Flowing Park Southeast	Hells Kitchen	DS	Mesaverde	7347	2239	6889	2100	458	140	1296	395	105	121	16	3	7	4	0.35	2.83	1551	10.02	Complex			DM	54604	0.0546	384722	5.5851	0.000385	0.38472
679	38.8921	-108.07	4.30995e+06	755095	Flowing Park Southeast	Hells Kitchen	ES	Mancos	6573	2003	6460	1969	113	34	410	125	302	318	16	8	31	23	0.28	3.63	1265	5.24	Single			DR	4068	0.0041	14699	4.1673	1.5e-05	0.0147
680	38.9015	-108.058	4.31354e+06	751649	Flowing Park Southeast	Southeast Bench	DS	Goodenough	9692	2954	8850	2697	842	257	9712	2961	156	116	40	8	34	26	0.09	11.53	1799	10.04	Complex			DM	1208376	1.2084	18882339	7.2761	0.018882	18.8823
681	38.9347	-108.097	4.31609e+06	753022	Flowing Park Southeast	Southeast Bench	RS-DS	Green River	9299	2834	8958	2730	341	104	2952	900	147	136	11	17	26	9	0.12	8.66	1753	10.98	Single			DM	136025	0.136	1211981	6.0835	0.001212	1.21198
682	38.9572	-108.08	4.31546e+06	754596	Flowing Park Southeast	Hells Kitchen	ES	Green River	8405	2562	8148	2484	257	78	892	272	171	186	15	5	25	20	0.29	3.47	1811	9.73	Single			DR	16974	0.017	88553	4.9472	8.9e-05	0.08855
683	38.9512	-108.062	4.31517e+06	755930	Flowing Park Southeast	Hells Kitchen	DS	Wasatch	7854	2394	7602	2317	252	77	1305	398	90	102	12	20	34	14	0.19	5.18	1769	11.2	Single			DM	29207	0.0292	175199	5.2435	0.000175	0.1752
684	38.9482	-108.047	4.31489e+06	755167	Flowing Park Southeast	Hells Kitchen	DS	Wasatch	8257	2517	8046	2452	211	64	833	254	156	165	9	6	24	18	0.25	3.95	1783	8.82	Single			DR	9171	0.0092	40840	4.6111	4.1e-05	0.04084
685	38.9458	-108.056	4.31748e+06	754528	Flowing Park Southeast	Southeast Bench	DS	Green River	9385	2861	8822	2689	563	172	3021	921	156	184	18	9	26	17	0.19	5.37	1849	9.6	Single			DM	95226	0.0952	774115	5.8888	0.000774	0.77412
686	38.9694	-108.062	4.31862e+06	755010	Flowing Park Southeast	Southeast Bench	DS	Green River	9853	3003	9217	2809	636	194	3116	950	186	158	28	5	29	24	0.2	4.9	1823	9.66	Successive			DM	154636	0.1546	1424007	6.1535	0.001424	1.42401
687	38.9794	-108.056	4.31788e+06	755040	Flowing Park Southeast	Southeast Bench	DS	Green River	9301	2835	8949	2728	352	107	2326	709	171	162	9	10	15	5	0.15	6.61	1828	10.47	Single			DY	32264	0.0323	198550	5.2979	0.000199	0.19855
688	38.9728	-108.056	4.31851e+06	756230	Flowing Park Southeast	Southeast Bench	ES	Green River	9147	2788	8939	2725	208	63	738	225	244	245	1	19	26	7	0.28	3.55	1798	11.95	Single			DR	9800	0.0098	44388	4.6473	4.4e-05	0.04439
689	38.9781	-108.042	4.31838e+06	756332	Flowing Park Southeast	Southeast Bench	ES	Wasatch	9047	2758	8898	2712	149	45	574	175	221	223	2	4	28	24	0.26	3.85	1822	10.8	Single			DR	10229	0.0102	46844	4.6707	4.7e-05	0.04684
690	38.9769	-108.041	4.3193e+06	755712	Flowing Park Southeast	Southeast Bench	ES	Goodenough	9762	2975	9429	2874	333	101	1883	574	114	112	2	10	28	18	0.18	5.65	1757	10.31	Complex			DM	53703	0.0537	376759	5.5761	0.000377	0.37676
691	38.9854	-108.048	4.31875e+06	756284	Flowing Park Southeast	Southeast Bench	DS	Green River	9496	2894	9244	2818	252	77	954	291	219	214	5	17	23	6	0.26	3.79	1813	8.19	Single			DR	5324	0.0053	20611	4.3141	2.1e-05	0.02061
692	38.9807	-108.041	4.31883e+06	756421	Flowing Park Southeast	Southeast Bench	DS	Green River	9563	2915	9384	2860	179	55	440	134	222	206	16	18	22	4	0.41	2.46	1845	8.33	Single			DM	4393	0.0044	16188	4.2092	1.6e-05	0.01619
693	38.9809	-108.04	4.31165e+06	771073	Leon Peak South	Cedar Mesa	ES	Mancos	6823	2080	6485	1977	338	103	2266	691	147	71	76	3	11	8	0.15	6.71	1528	7.98	Single			DR	127340	0.1273	1115511	6.0475	0.001116	1.11551
694	38.9119	-107.874	4.3128e+06	776413	Leon Peak South	Durkee Ridge	DS	Mesaverde	7032	2143	6774	2065	258	79	997	304	280	266	14	17	29	12	0.26	3.86	1362	13.82	Single			DY	39495	0.0395	256029	5.4083	0.000256	0.25603
695	38.9205	-107.813	4.32159e+06	780704	Leon Peak South	Duke Basin	DS	Green River	10619	3237	9771	2978	848	258	2959	902	79	162	83	16	32	16	0.29	3.49	1878	10.26	Complex			DM	178579	0.1786	1706525	6.2321	0.001707	1.70653
696	38.9983	-107.759	4.32171e+06	779516	Leon Peak South	Duke Basin	ES	Wasatch	9987	3044	9806	2989	181	55	1164	355	221	228	7	2	8	6	0.16	6.43	1767	9.25	Single			DM	67182	0.0672	499266	5.6983	0.000499	0.49927
697	38.9998	-107.772	4.32151e+06	779596	Leon Peak South	Duke Basin	ES	Wasatch	9931	3027	9778	2980	153	47	813	248	198	224	26	4	17	13	0.19	5.32	1869	11.07	Single			DM	41086	0.0411	269061	5.4299	0.000269	0.26906
698	38.9979	-107.772	4.32213e+06	780332	Leon Peak South	Duke Basin	RS	Green River	10773	3284	10452	3186	321	98	1027	313	229	216	13	5	29	24	0.31	3.2	1687	7.94	Single			DR	20341	0.0203	111171	5.046	0.000111	0.11117
699	39.0035	-107.763	4.31824e+06	782120	Leon Peak South	Duke Basin	DS	Mesaverde	8616	2626	8422	2567	194	59	505	154	180	181	1	18	20	2	0.38	2.6	1820	9	Single			DY	7321	0.0073	30762	4.488	3.1e-05	0.03076
700	38.9677	-107.744	4.31778e+06	780553	Leon Peak South	Duke Basin	DS	Mesaverde	8497	2590	8353	2546	144	44	571	174	89	64	25	13	20	7	0.25	3.96	1363	10.49	Single			DM	5784	0.0058	22876	4.3594	2.3e-05	0.02288
701	38.9641	-107.762	4.32415e+06	781300	Leon Peak South	Duke Basin	EF	Green River	10323	3146	10053	3064	270	82	1138	347	119	116	3	17	25	8	0.24	4.22	1792	10.41	Complex			DM	12006	0.012	57296	4.7581	5.7e-05	0.0573
702	39.0212	-107.751	4.32528e+06	711715	Palisade South	Orchard Mesa	ES	Mancos	4627	1410	4578	1395	49	15	394	120	11	349	22	2	14	12	0.12	8.03	1388	13.73	Composite			DY	12860	0.0129	62466	4.7956	6.2e-05	0.06247
703	39.0509	-108.554	4.32511e+06	716314	Palisade South	Orchard Mesa	ES	Mancos	4675	1425	4594	1400	81	25	269	82	336	351	15	21	25	4	0.3	3.32	1306	14.47	Single			DY	1757	0.0018	5116	3.7089	5e-06	0.00512
704	39.0483	-108.5	4.31823e+06	726991	Flowing Park Northwest	The Hunting Grounds	ES	Mancos	5057	1541	4957	1511	100	30	328	100	217	206	11	18	34	16	0.3	3.28	1617	9.45	Single			DM	1869	0.0019	5530	3.7427	6e-06	0.00553
705	38.9836	-108.379	4.30055e+06	744410	Flowing Park Southeast	Alkali Basin	DS	Mancos	6023	1836	5544	1690	479	146	1158	353	182	160	338	2	35	33	0.41	2.42	1671	9.34	Single			DM	10015	0.01	45617	4.6591	4.6e-05	0.04562
706	38.8197	-108.185	4.32306e+06	770200	Leon Peak South	Happy Hollow Gulch	EF	Green River	9822	2994	9365	2854	457	139	2198	670	163	175	12	6	7	1	0.21	4.81	1671	9.13	Successive			DR	70953	0.071	534749	5.7281	0.000535	0.53475
707	39.0149	-107.879	4.32296e+06	770440	Leon Peak South	Happy Hollow Gulch	ES	Green River	9583	2921	9361	2853	222	68	531	162	166	177	11	21	31	10	0.42	2.39	1898	8.48	Successive			DR	15894	0.0159	81524	4.9113	8.2e-05	0.08152
708	39.0138	-107.877	4.32262e+06	769558	Leon Peak South	Happy Hollow Gulch	EF	Green River	9777	2980	9480	2890	297	91	843	257	186	202	16	9	25	16	0.35	2.84	1872	7.8	Single			DR	11318	0.0113	53199	4.7259	5.3e-05	0.0532
709	39.0111	-107.887	4.32064e+06	775805	Leon Peak South	Durkee Ridge	ES	Wasatch	9147	2788	8793	2680	354	108	3657	1115	318	186	132	1	13	12	0.1	10.33	1822	8.69	Complex			DR	255996	0.256	2683746	6.4287	0.002684	2.68375
710	38.9914	-107.816	4.31917e+06	763265	Flowing Park Southeast	Hells Kitchen	ES	Wasatch	8294	2528	7807	2380	487	148	3303	1007	217	222	5	5	15	10	0.15	6.78	1696	8.75	Single	Qefo		DR	324179	0.3242	3611352	6.5577	0.003611	3.61135
711	38.982	-107.961	4.33123e+06	738654	Palisade North	The Blowout	DS	Wasatch	8279	2523	8157	2486	122	37	712	217	294	326	32	7	27	20	0.17	5.83	1246	13.98	Single			DY	21211	0.0212	117180	5.0689	0.000117	0.11718
712	39.0975	-108.24	4.33136e+06	738399	Palisade North	The Blowout	DS	Wasatch	8102	2469	7944	2421	158	48	643	196	307	305	2	5	32	27	0.25	4.07	1509	13.26	Single			DY	8889	0.0089	39264	4.594	3.9e-05	0.03926
713	39.0988	-108.243	4.3316e+06	739736	Palisade North	The Blowout	EF	Green River	8740	2664	8403	2561	337	103	1328	405	335	340	5	21	25	4	0.25	3.94	1295	10.61	Single	Qefo		DR	18248	0.0182	96988	4.9867	9.7e-05	0.09699
714	39.1008	-108.227	4.33053e+06	741222	Palisade North	West Bench	RS-EF	Goodenough	9698	2956	8237	2511	1461	445	4120	1256	52	61	9	4	15	11	0.35	2.82	1611	9.46	Single	Qefr		DM	80993	0.081	631553	5.8004	0.000632	0.63155
715	39.0928	-108.21	4.33039e+06	741385	Palisade North	West Bench	RS-EF	Goodenough	9729	2965	8152	2485	1577	481	5114	1559	49	51	2	1	33	32	0.31	3.24	1457	9.91	Complex	Qefr		DM	232392	0.2324	2376431	6.3759	0.002376	2.37643
716	39.0917	-108.206	4.32819e+06	742744	Palisade North	West Bench	RS	Goodenough	9853	3003	9666	2946	187	57	1450	442	30	34	4	4	26	22	0.13	7.75	1590	13.68	Single	Qefr		DY	33298	0.0333	206582	5.3151	0.000207	0.20658
717	39.0691	-108.194	4.3286e+06	743545	Palisade North	West Bench	RS	Green River	9165	2793	8675	2644	490	149	1342	409	28	33	5	18	27	9	0.37	2.74	1264	9.05	Successive	Qlsu		DR	16246	0.0162	83806	4.9233	8.4e-05	0.08381
718	39.0731	-108.185	4.33267e+06	757558	Palisade North	Bull Basin	EF	Green River	9410	2868	8719	2658	691	211	3487	1063	350	14	24	3	19	16	0.2	5.05	1511	10.2	Single	Qefr		DM	91072	0.0911	731902	5.8645	0.000732	0.7319
719	39.1051	-108.021	4.33319e+06	757190	Palisade North	Bull Basin	EF	Green River	9441	2878	8455	2577	986	301	5606	1709	298	308	10	2	18	16	0.18	5.69	1619	10.83	Successive	Qefr		DM	123862	0.1239	1077339	6.0324	0.001077	1.07734
720	39.1079	-108.022	4.33307e+06	757658	Palisade North	Bull Basin	EF	Green River	9285	2830	8472	2582	813	248	2742	836	318	328	10	6	9	3	0.3	3.37	1589	10.78	Successive	Qefr		DM	43208	0.0432	286644	5.4573	0.000287	0.28664
721	39.1091	-108.021	4.34374e+06	756720	Palisade North	Mormon Mesa	EF	Wasatch	6508	1984	6274	1912	234	71	2453	748	337	355	18	2	7	5	0.1	10.48	1505	12.6	Complex			DY	58328	0.0583	417999	5.6212	0.000418	0.418
722	39.2039	-108.026	4.34374e+06	756873	Palisade North	Mormon Mesa	ES	Wasatch	6435	1961	6251	1905	184	56	1676	511	303	307	4	2	26	24	0.11	9.11	1531	13	Complex			DY	49560	0.0496	340592	5.5322	0.000341	0.34059
723	39.205	-108.025	4.34367e+06	756435	Palisade North	Mormon Mesa	EF	Wasatch	6460	1969	6096	1858	364	111	2280	695	292	315	23	8	30	22	0.16	6.26	1265	13.56	Complex			DY	53618	0.0536	376008	5.5752	0.000376	0.37601
724	39.2042	-108.03	4.34512e+06	757342	Palisade North	Mormon Mesa	EF	Wasatch	6301	1921	5840	1780	461	141	3303	1007	2	352	10	3	41	38	0.14	7.16	1457	10.92	Composite			DM	144604	0.1446	1308848	6.1169	0.001309	1.30885
725	39.2172	-108.019	4.34492e+06	756875	Palisade North	Mormon Mesa	EF	Wasatch	6080	1853	5794	1766	286	87	2139	652	312	330	18	3	21	18	0.13	7.48	1491	10.95	Composite			DM	93110	0.0931	752550	5.8765	0.000753	0.75255
726	39.2156	-108.025	4.3469e+06	762420	Palisade North	Kansas Mesa	DS	Wasatch	6186	1885	6036	1840	150	46	485	148	59	12	47	6	17	11	0.31	3.24	1460	10.55	Single			DM	50865	0.0509	351905	5.5464	0.000352	0.35191
727	39.2321	-107.96	4.34731e+06	762266	Palisade North	Kansas Mesa	DS	Wasatch	6114	1864	6010	1832	104	32	653	199	49	52	3	2	17	15	0.16	6.28	1502	15.16	Single			DY	8526	0.0085	37261	4.5713	3.7e-05	0.03726
728	39.2354	-107.961	4.34637e+06	763306	Palisade North	Kansas Mesa	DS	Wasatch	6215	1894	6136	1870	79	24	459	140	59	46	13	3	14	11	0.17	5.81	1510	14.01	Single			DY	12897	0.0129	62692	4.7972	6.3e-05	0.06269
729	39.2267	-107.95	4.33872e+06	762538	Palisade North	Kansas Mesa	ES	Green River	7628	2325	7217	2200	411	125	1492	455	316	303	13	4	29	25	0.28	3.63	1676	12.12	Complex			DY	59838	0.0598	431647	5.6351	0.000432	0.43165
730	39.1581	-107.962	4.33809e+06	762387	Palisade North	Kansas Mesa	ES	Green River	7789	2374	7351	2241	438	134	1807	551	299	303	4	20	31	11	0.24	4.13	1430	12.4	Complex			DY	74002	0.074	563796	5.7511	0.000564	0.5638
731	39.1525	-107.964	4.33784e+06	762145	Palisade North	Kansas Mesa	EF	Green River	7970	2429	7306	2227	664	202	3621	1104	320	311	9	14	39	25	0.18	5.45	1395	12.53	Composite			DY	112858	0.1129	958420	5.9816	0.000958	0.95842
732	39.1504	-107.966	4.33767e+06	761972	Palisade North	Kansas Mesa	ES	Green River	7586	2312	7412	2259	174	53	751	229	303	276	27	7	30	23	0.23	4.32	1407	14.03	Complex			DY	16161	0.0162	83255	4.9204	8.3e-05	0.08326
733	39.1488	-107.969	4.34005e+06	762442	Palisade North	Kansas Mesa	EF	Wasatch	7413	2259	7063	2153	350	107	1453	443	196	190	6	10	32	22	0.24	4.15	1686	10.8	Single			DY	19518	0.0195	105544	5.0234	0.000106	0.10554
734	39.1704	-107.962	4.30913e+06	735766	Flowing Park Northwest	Indian Point	ES	Mancos	6294	1918	5786	1764	508	155	4284	1306	307	303	4	5	32	27	0.12	8.43	1330	8.11	Complex			DR	398371	0.3984	4679432	6.6702	0.004679	4.67943
735	38.8994	-108.281	4.35076e+06	778667	Leon Peak North	Vega	ES	Wasatch	7846	2391	7605	2318	241	73	827	252	331	298	33	8	34	26	0.29	3.43	1354	12.63	Complex			DY	21579	0.0216	119744	5.0783	0.00012	0.11974
736	39.2614	-107.77	4.3509e+06	778568	Leon Peak North	Vega	ES	Wasatch	7601	2317	7262	2213	339	103	1171	357	352	322	30	11	25	14	0.29	3.45	1415	12.19	Single			DY	32646	0.0326	201508	5.3043	0.000202	0.20151
737	39.2631	-107.771	4.34844e+06	779489	Leon Peak North	Vega	ES	Green River	8318	2535	7941	2420	377	115	1886	575	284	250	34	3	34	31	0.2	5	1689	11.82	Single			DM	118165	0.1182	1015418	6.0066	0.001015	1.01542
738	39.2402	-107.762	4.34845e+06	779226	Leon Peak North	Vega	ES	Green River	8508	2593	7872	2399	636	194	2608	795	318	315	3	15	32	17	0.24	4.1	1758	10.6	Single			DM	64692	0.0647	476114	5.6777	0.000476	0.47611
739	39.2405	-107.765	4.3486e+06	779771	Leon Peak North	Vega	ES	Wasatch	8223	2506	7939	2420	284	87	1233	376	339	341	2	12	25	13	0.23	4.34	1555	13.02	Single			DM	32427	0.0324	199812	5.3006	0.0002	0.19981
740	39.2416	-107.758	4.34936e+06	778802	Leon Peak North	Vega	EF	Green River	8208	2502	7845	2391	363	111	1319	402	24	52	28	14	33	19	0.28	3.63	1567	13.04	Complex			DY	26241	0.0262	153125	5.185	0.000153	0.15313
741	39.2488	-107.769	4.34912e+06	778822	Leon Peak North	Vega	ES	Green River	8271	2521	7980	2432	291	89	686	209	47	23	24	10	28	18	0.42	2.36	1505	11.8	Single			DY	8854	0.0089	39070	4.5918	3.9e-05	0.03907
742	39.2466	-107.769	4.34922e+06	778818	Leon Peak North	Vega	ES	Green River	8236	2510	7975	2431	261	80	620	189	269	273	4	5	29	24	0.42	2.38	1539	12.03	Single			DY	10348	0.0103	47532	4.677	4.8e-05	0.04753
743	39.2475	-107.769	4.34801e+06	777785	Leon Peak North	Vega	DS	Wasatch	8206	2501	7785	2373	421	128	1843	562	324	348	24	1	38	37	0.23	4.38	1554	13.8	Complex			DY	62888	0.0629	459489	5.6623	0.000459	0.45949
744	39.2369	-107.782	4.34832e+06	777784	Leon Peak North	Vega	EF	Wasatch	8122	2476	7765	2367	357	109	1237	377	303	297	6	8	28	20	0.29	3.46	1486	13.01	Successive			DY	24106	0.0241	137633	5.1387	0.000138	0.13763
745	39.2396	-107.781	4.34844e+06	777765	Leon Peak North	Vega	EF	Wasatch	8028	2447	7696	2346	332	101	1109	338	329	316	13	7	26	19	0.3	3.34	1496	11.96	Successive			DY	21846	0.0218	121613	5.085	0.000122	0.12161
746	39.2408	-107.782	4.34862e+06	777660	Leon Peak North	Vega	ES	Wasatch	7855	2394	7696	2346	159	48	446	136	249	252	3	6	27	21	0.36	2.81	1600	12.07	Single			DY	3996	0.004	14369	4.1574	1.4e-05	0.01437
747	39.2425	-107.783	4.34873e+06	777583	Leon Peak North	Vega	ES	Wasatch	7865	2397	7622	2323	243	74	715	218	292	285	7	6	27	21	0.34	2.94	1554	14.93	Single			DY	13212	0.0132	64622	4.8104	6.5e-05	0.06462
748	39.2435	-107.784	4.34844e+06	775506	Leon Peak North	Vega	EF	Green River	8043	2452	7711	2350	332	101	2306	703	2	9	7	13	43	30	0.14	6.95	1119	12.51	Complex			DY	39827	0.0398	258738	5.4129	0.000259	0.25874
749	39.2423	-107.808	4.34824e+06	775761	Leon Peak North	Vega	EF	Green River	8561	2609	7670	2338	891	272	3332	1016	17	2	15	5	16	11	0.27	3.74	1510	11.2	Composite			DM	81013	0.081	631751	5.8005	0.000632	0.63175
750	39.2397	-107.805	4.34905e+06	776515	Leon Peak North	Vega	EF	Wasatch	8026	2446	7628	2325	398	121	1512	461	55	60	5	4	39	35	0.26	3.8	1480	13.48	Complex			DY	37575	0.0376	240477	5.3811	0.00024	0.24048
751	39.2472	-107.795	4.34785e+06	773544	Leon Peak North	Vega	RS	Wasatch	7752	2363	7360	2243	392	119	1522	464	221	240	19	3	18	15	0.26	3.88	1667	11.83	Single			DY	51458	0.0515	357069	5.5528	0.000357	0.35707
752	39.2369	-107.831	4.34821e+06	773376	Leon Peak North	Vega	RS	Wasatch	7734	2357	7291	2222	443	135	1755	535	284	285	1	4	19	15	0.25	3.96	1587	13.03	Single			DY	80989	0.081	631514	5.8004	0.000632	0.63151
753	39.2402	-107.833	4.33686e+06	777193	Leon Peak North	The Flat Tops	ES	Goodenough	10005	3050	9344	2848	661	201	5353	1632	288	278	10	4	16	12	0.12	8.1	1785	10.29	Composite			DY	549886	0.5499	7017493	6.8462	0.007017	7.01749
754	39.1369	-107.793	4.33729e+06	777407	Leon Peak North	The Flat Tops	ES	Goodenough	10012	3052	9510	2899	502	153	3260	994	255	238	17	5	10	5	0.15	6.49	1740	11.24	Composite			DY	130660	0.1307	1152198	6.0615	0.001152	1.1522
755	39.1407	-107.79	4.33851e+06	777616	Leon Peak North	The Flat Tops	ES	Green River	9858	3005	9674	2949	184	56	1578	481	344	328	16	9	30	21	0.12	8.57	1809	10.92	Complex			DM	87218	0.0872	693177	5.8408	0.000693	0.69318
756	39.1515	-107.787	4.3388e+06	786829	Leon Peak North	The Flat Tops	ES	Green River	10173	3101	9543	2909	630	192	2558	780	26	52	26	10	37	27	0.25	4.06	1583	11.13	Complex			DM	346468	0.3465	3926236	6.594	0.003926	3.92624
757	39.1512	-107.681	4.33946e+06	786333	Leon Peak North	The Flat Tops	ES	Green River	9862	3006	9508	2898	354	108	1932	589	49	44	5	12	29	17	0.18	5.46	1429	10.83	Complex			DM	300293	0.3003	3280053	6.5159	0.00328	3.28005
758	39.1572	-107.686	4.33573e+06	787047	Leon Peak North	The Flat Tops	ES	Goodenough	10643	3244	10216	3114	427	130	1817	554	132	122	10	6	28	22	0.23	4.26	1811	10.96	Multiple			DM	132005	0.132	1167122	6.0671	0.001167	1.16712
759	39.1234	-107.68	4.33682e+06	787455	Leon Peak North	The Flat Tops	ES	Goodenough	10493	3198	10003	3049	490	149	2171	662	71	109	38	5	23	18	0.23	4.43	1716	11.29	Single			DM	66244	0.0662	490522	5.6907	0.000491	0.49052
760	39.1333	-107.675	4.33637e+06	787397	Leon Peak North	The Flat Tops	ES	Goodenough	10594	3229	10117	3084	477	145	2437	743	68	103	35	5	28	23	0.2	5.11	1763	9.93	Single			DM	217859	0.2179	2191122	6.3407	0.002191	2.19112
761	39.1291	-107.675	4.33774e+06	787396	Leon Peak North	The Flat Tops	ES	Green River	10392	3167	9643	2939	749	228	3982	1214	48	56	8	5	34	29	0.19	5.32	1673	9.47	Multiple			DM	704778	0.7048	9587001	6.9817	0.009587	9.587
762	39.1414	-107.675	4.3374e+06	785212	Leon Peak North	The Flat Tops	ES	Green River	10520	3206	9887	3014	633	193	3372	1028	200	224	24	4	31	27	0.19	5.33	1744	9.9	Composite			DR	183838	0.1838	1769942	6.248	0.00177	1.76994
763	39.1391	-107.7	4.31858e+06	748666	Flowing Park Northwest	Kannah Creek Basin	DS	Green River	9835	2998	8621	2628	1214	370	5861	1787	331	288	43	7	30	23	0.21	4.83	1625	11.53	Multiple			DY	173760	0.1738	1648830	6.2172	0.001649	1.64883
764	38.981	-108.129	4.31943e+06	749348	Flowing Park Northwest	Kannah Creek Basin	DS	Green River	9684	2952	9339	2847	345	105	2011	613	293	304	11	10	21	11	0.17	5.83	1653	12.98	Multiple	Qefr		DY	49990	0.05	344307	5.5369	0.000344	0.34431
765	38.9882	-108.121	4.31913e+06	748991	Flowing Park Northwest	Kannah Creek Basin	DS	Wasatch	9568	2916	9140	2786	428	130	1765	538	275	302	27	17	24	7	0.24	4.12	1519	10.03	Single	Qefr		DY	20915	0.0209	115132	5.0612	0.000115	0.11513
766	38.9858	-108.125	4.31947e+06	743456	Palisade South	Kannah Creek Basin	DS	Wasatch	8869	2703	8471	2582	398	121	1092	333	235	283	48	14	34	20	0.36	2.74	1554	13.02	Complex			DY	22569	0.0226	126695	5.1028	0.000127	0.1267
767	38.9904	-108.19	4.31961e+06	743367	Palisade South	Kannah Creek Basin	DS	Wasatch	8949	2728	8273	2522	676	206	2073	632	260	267	7	16	34	18	0.33	3.07	1645	11.67	Complex			DY	36965	0.037	235579	5.3721	0.000236	0.23558
768	38.9913	-108.191	4.31906e+06	743169	Palisade South	Kannah Creek Basin	DS	Mesaverde	8467	2581	8250	2515	217	66	417	127	298	301	3	5	40	35	0.52	1.92	1766	10.9	Single			DY	7374	0.0074	31043	4.492	3.1e-05	0.03104
769	38.9868	-108.193	4.31984e+06	744053	Palisade South	Kannah Creek Basin	EF	Wasatch	9200	2804	8587	2617	613	187	3103	946	173	180	7	5	17	12	0.2	5.06	1785	11.85	Complex			DM	125590	0.1256	1096265	6.0399	0.001096	1.09627
770	38.9925	-108.182	4.31737e+06	780334	Leon Peak South	Duke Basin	EF	Wasatch	8800	2682	8467	2581	333	101	1801	549	160	108	52	10	12	2	0.18	5.41	1648	10.47	Successive			DM	32106	0.0321	197332	5.2952	0.000197	0.19733
771	38.9605	-107.765	4.30701e+06	772150	Leon Peak South	Cedar Mesa	ES	Mancos	6222	1896	6017	1834	205	62	682	208	182	149	33	22	31	9	0.3	3.33	1667	11.29	Composite			DM	112285	0.1123	952308	5.9788	0.000952	0.95231
772	38.8698	-107.863	4.30224e+06	761586	Flowing Park Southeast	Happy Hollow Gulch	EF	Mancos	5399	1646	5217	1590	182	55	869	265	281	275	6	5	18	13	0.21	4.78	1460	10.47	Multiple			DM	13170	0.0132	64368	4.8087	6.4e-05	0.06437
773	38.8301	-107.987	4.30173e+06	761478	Flowing Park Southeast	Happy Hollow Gulch	EF	Mancos	5356	1633	5163	1574	193	59	728	222	283	276	7	4	16	12	0.27	3.77	1477	10.23	Single			DY	8939	0.0089	39543	4.5971	4e-05	0.03954
774	38.8256	-107.988	4.30057e+06	760962	Flowing Park Southeast	Happy Hollow Gulch	ES	Mancos	5308	1618	5127	1563	181	55	515	157	271	293	22	1	17	16	0.35	2.85	1479	9.45	Single			DM	21277	0.0213	117643	5.0706	0.000118	0.11764
775	38.8153	-107.994	4.30979e+06	751642	Flowing Park Southeast	Hells Kitchen	DS	Mesaverde	8952	2729	7257	2212	1695	517	7813	2382	173	133	40	4	18	14	0.22	4.61	1746	7.48	Composite			DR	1762505	1.7625	30349156	7.4821	0.030349	30.3492
776	38.8977	-108.092	4.30811e+06	751266	Flowing Park Southeast	Hells Kitchen	DS	Mesaverde	8147	2483	7491	2283	656	200	5901	1799	186	133	53	8	25	17	0.11	9	1693	8.38	Single			DR	1732668	1.7327	29704648	7.4728	0.029705	29.7047
777	38.886	-108.103	4.31191e+06	755254	Flowing Park Southeast	Hells Kitchen	EF	Wasatch	8142	2482	6916	2108	1226	374	7692	2345	93	80	13	11	15	4	0.16	6.27	1525	7.88	Successive			DR	854668	0.8547	12217082	7.087	0.012217	12.2171
778	38.919	-108.056	4.32251e+06	738997	Palisade South	Whitewater Basin	DS	Wasatch	8742	2665	8411	2564	331	101	994	303	55	31	24	17	46	29	0.33	3	1016	10.67	Single			DY	22597	0.0226	126888	5.1034	0.000127	0.12689
779	39.019	-108.239	4.34304e+06	776032	Leon Peak North	Vega	EF	Green River	8689	2648	8531	2600	158	48	843	257	236	222	14	14	27	13	0.19	5.34	1798	12.27	Single			DY	6854	0.0069	28316	4.452	2.8e-05	0.02832
780	39.193	-107.804	4.32813e+06	783917	Leon Peak North	Hubbard Park	RS-DS	Goodenough	10900	3322	10253	3125	647	197	3582	1092	266	265	1	4	8	4	0.18	5.54	1790	9.43	Complex			DM	197446	0.1974	1936196	6.2869	0.001936	1.9362
781	39.0555	-107.719	4.31213e+06	770684	Leon Peak South	Cedar Mesa	ES	Mancos	6881	2097	6560	1999	321	98	2703	824	218	70	148	5	16	11	0.12	8.42	1475	8.27	Single			DR	359281	0.3593	4109634	6.6138	0.00411	4.10963
